# Supplementary material
Source: MDPI journal article supplement (https://www.mdpi.com/1996-1073/15/9/3275)
Supplement: s1 [file s1]

## SUPPLEMENTARY MATERIAL

### "Teaching power sector models social and political awareness"

Anna Garcia-Teruel (DLR), Yvonne Scholz (DLR), Wolfgang Weimer-Jehle (ZIRIUS), Sigrid Prehofer (ZIRIUS), Karl-Kiên Cao (DLR), Dipl. Wi.-Ing. Frieder Borggreffe (DLR)

# Contents

|                                                         |           |
|---------------------------------------------------------|-----------|
| <b>A. Elements and Matrices for Scenario Definition</b> | <b>3</b>  |
| <b>B. REMix Model - Myopic vs Static Implementation</b> | <b>9</b>  |
| <b>C. Assumptions and Parametrisation</b>               | <b>11</b> |
| <b>D. Technical Parameters</b>                          | <b>25</b> |
| <b>E. Variable Factors: Literature Values</b>           | <b>35</b> |
| <b>F. Simulation Results</b>                            | <b>44</b> |
| F1. Static vs Myopic . . . . .                          | 45        |
| F2. Sensitivity Study with Static Approach . . . . .    | 57        |
| F3. Sensitivity Study with Myopic Approach . . . . .    | 61        |

# **A Elements and Matrices for Scenario Definition**

Table S1.: Social descriptors selected by ZIRIUS in [WJPH15]

| Descriptor Type                 | Descriptor                                                                        | ID     |
|---------------------------------|-----------------------------------------------------------------------------------|--------|
| System external descriptors     | A(I). Global development                                                          | A(I)   |
|                                 | A(II). World market prices for fossil fuels                                       | A(II)  |
|                                 | A(III). Interest rate development                                                 | A(III) |
|                                 | B. EU-integration                                                                 | B      |
|                                 | C. Population development                                                         | C      |
| System descriptors for economy  | D. GDP-development                                                                | D      |
|                                 | E. Labour market development                                                      | E      |
|                                 | F. Tertiariation of the economy                                                   | F      |
|                                 | G. Innovation capability of the national economy                                  | G      |
|                                 | H. Transnational trade flows                                                      | H      |
|                                 | I. International integration of the electricity grid                              | I      |
|                                 | J. Infrastructure development of the electricity grid                             | J      |
|                                 | K. Capacity development of renewable energies (Electricity)                       | K      |
|                                 | L. Tendency to centrality/de-centrality of the electricity generation and storage | L      |
| System descriptors for politics | M. Market organisation of the electricity market                                  | M      |
|                                 | N. Political stability in the energy field                                        | N      |
|                                 | O. Steering instruments in the energy field                                       | O      |
|                                 | P. Governance in infrastructure expansion                                         | P      |
|                                 | Q. Planning law/ Public infrastructure planning                                   | Q      |
|                                 | R. Governmental design objectives                                                 | R      |
| System descriptors for society  | S. Social-governmental development                                                | S      |
|                                 | T. Welfare development                                                            | T      |
|                                 | U. Technology acceptance for energy technologies                                  | U      |
|                                 | V. Individual energy consumption behavior                                         | V      |
| System descriptors for culture  | W. Educational development                                                        | W      |
|                                 | X. Attitude of the population towards the energy turnaround/ NIMBY                | X      |
|                                 | Y. Value orientation and objectives of the economy design                         | Y      |
| Passive descriptors             | Z. Media discourse                                                                | Z      |
|                                 | Efficiency development of household appliances                                    | a      |
|                                 | Efficiency development of automobiles (Electric)                                  | b      |
|                                 | Efficiency development of automobiles (Combustion engine)                         | c      |
|                                 | Efficiency development of private buildings                                       | d      |
|                                 | Efficiency development in industry                                                | e      |
|                                 | Efficiency development in whole sale field                                        | f      |
|                                 | Grid-connected heat supply - district heat potential                              | g      |
|                                 | Investments in new automobile concepts and infrastructure                         | h      |
|                                 | Living trends (I)                                                                 | i      |
|                                 | Investments in RE-expansion for heat                                              | j      |
|                                 | Rebound in the individual consumption                                             | k      |

Table S2.: Selected representative power system model parameters

| Parameter Type                     | Parameter                                                                                      | ID |
|------------------------------------|------------------------------------------------------------------------------------------------|----|
| <b>Power generation potentials</b> | Usable areas                                                                                   | 1  |
|                                    | Biomass imports allowed?                                                                       | 2  |
|                                    | Annually usable geothermal energy                                                              | 3  |
|                                    | National vs. European supply security: assured capacity                                        | 4  |
|                                    | National vs. European supply security: share of nationally generated in nationally used energy | 5  |
|                                    | Renewables Share                                                                               | 6  |
| <b>Technical Parameters</b>        | Efficiency                                                                                     | 7  |
|                                    | Life time                                                                                      | 8  |
|                                    | Availability                                                                                   | 9  |
|                                    | Emission factors                                                                               | 10 |
| <b>Costs</b>                       | Investment costs and fixed operation costs                                                     | 11 |
|                                    | Variable costs                                                                                 | 12 |
|                                    | Fuel prices                                                                                    | 13 |
|                                    | CO <sub>2</sub> certificate prices                                                             | 14 |
|                                    | Interest rate                                                                                  | 15 |
|                                    | Tear and wear costs                                                                            | 16 |
| <b>Scenario information</b>        | Annual conventional power demand                                                               | 17 |
|                                    | Annual power demand of additional consumers                                                    | 18 |
|                                    | Power generation: installed capacities                                                         | 19 |
|                                    | Power generation: max. installable capacities                                                  | 20 |
|                                    | Energy storage: installed capacities                                                           | 21 |
|                                    | Energy storage: max. installable capacities                                                    | 22 |
|                                    | Power transmission: installed capacities                                                       | 23 |
|                                    | Power transmission: max. installable capacities                                                | 24 |
|                                    | Annual heat demand covered with CHP and heat pumps                                             | 25 |
| <b>Other parameters</b>            | Regions                                                                                        | 26 |
|                                    | Electric load time series                                                                      | 27 |
|                                    | Heat load time series                                                                          | 28 |
|                                    | Load shifting characteristics of additional consumers                                          | 29 |

# Elements and Matrices for Scenario Definition

Table S3.: Descriptors-DSM

| ID   | AD | AD   | AD   | B | C    | D    | E    | F    | G    | H    | I    | J    | K    | L    | M    | N    | O    | P    | Q    | R    | S    | T | U | V    | W    | X    | Y    | Z    | a    | b | c    | d    | e    | f    | g    | h    | i    | j    | k    |      |   |
|------|----|------|------|---|------|------|------|------|------|------|------|------|------|------|------|------|------|------|------|------|------|---|---|------|------|------|------|------|------|---|------|------|------|------|------|------|------|------|------|------|---|
| A0   | 0  | 0.67 | 3.00 | 0 | 0.89 | 0.42 | 0.67 | 0.19 | 0.83 | 1.56 | 0    | 0    | 0    | 0    | 0    | 0.13 | 0.44 | 0    | 0    | 0.50 | 0.75 | 0 | 0 | 0    | 1.75 | 1.00 | 0.56 | 0.50 | 0    | 0 | 0    | 1.33 | 1.13 | 0    | 0    | 0    | 0    | 0    | 0    | 0    | 0 |
| A10  | 0  | 0    | 0    | 0 | 0    | 0.33 | 0    | 0.33 | 0.44 | 0.92 | 0    | 0    | 1.50 | 0.59 | 0    | 0.39 | 0    | 0    | 0.42 | 0.50 | 0    | 0 | 0 | 0    | 0    | 0.39 | 0    | 0    | 0    | 0 | 1.67 | 0    | 2.00 | 1.00 | 1.33 | 1.00 | 0    | 0.67 | 0.89 | 1.78 |   |
| A100 | 0  | 0    | 0    | 0 | 0    | 0    | 0    | 0.25 | 0    | 0    | 0    | 0    | 0.22 | 0.41 | 0    | 0    | 0    | 0    | 0    | 0    | 1.29 | 0 | 0 | 0    | 0    | 0    | 0    | 0    | 0    | 0 | 0    | 0    | 0    | 0.00 | 0    | 0    | 0    | 0    | 0    |      |   |
| B    | 0  | 0    | 0    | 0 | 0.63 | 0    | 0.22 | 1.00 | 0.96 | 1.96 | 2.04 | 0    | 0    | 0.48 | 0.30 | 0.44 | 0.85 | 0    | 0.88 | 0.58 | 1.06 | 0 | 0 | 0    | 1.44 | 0.17 | 0.75 | 0    | 0    | 0 | 0    | 0    | 0    | 0    | 0    | 0    | 0    | 0    | 0    | 0    |   |
| C    | 0  | 0    | 0    | 0 | 0    | 0.89 | 1.06 | 1.25 | 0.44 | 0    | 0    | 0    | 0    | 0    | 0    | 0    | 0    | 0    | 0    | 0.78 | 0    | 0 | 0 | 0.58 | 1.39 | 0    | 0    | 0.22 | 1.33 | 0 | 0    | 0    | 0    | 0    | 0    | 1.00 | 0.67 | 0.56 | 0    |      |   |
| D    | 0  | 0    | 0    | 0 | 0    | 0    | 1.39 | 1.25 | 0.44 | 0.92 | 0    | 0    | 0    | 0    | 0    | 0    | 0    | 0    | 0.67 | 0    | 0    | 0 | 0 | 0    | 1.17 | 0    | 0    | 0.72 | 0    | 0 | 0    | 0    | 0    | 0    | 1.50 | 1.33 | 0    | 2.00 | 0    | 0    |   |
| E    | 0  | 0    | 0    | 0 | 0    | 1.44 | 0.39 | 0    | 0    | 0.22 | 1.17 | 0    | 0    | 0    | 0    | 0    | 0    | 0    | 0.56 | 1.54 | 0.39 | 0 | 0 | 0    | 0    | 0.25 | 0.33 | 1.25 | 0    | 0 | 0    | 0    | 0    | 0.33 | 0    | 0    | 0.67 | 0    | 0    |      |   |
| F    | 0  | 0    | 0    | 0 | 0    | 0.22 | 0    | 0.17 | 0    | 0.44 | 0.94 | 0    | 0    | 0    | 0    | 0    | 0    | 0    | 0    | 0    | 0    | 0 | 0 | 0    | 0    | 0.39 | 0.78 | 0    | 0    | 0 | 0    | 0    | 0    | 0    | 0    | 0    | 0.67 | 0    | 0    |      |   |
| G    | 0  | 0    | 0    | 0 | 0    | 0.5  | 0    | 0    | 0    | 1.29 | 0    | 0    | 0    | 0.26 | 0    | 0    | 0    | 0    | 0    | 0    | 0    | 0 | 0 | 0    | 0    | 0    | 0    | 0    | 0    | 0 | 0    | 0    | 0    | 0    | 0    | 0    | 0    | 0    | 0    |      |   |
| H    | 0  | 0    | 0    | 0 | 0    | 0.79 | 0.50 | 1.31 | 0.47 | 0    | 0    | 0    | 0    | 0    | 0    | 0    | 0.42 | 0    | 0    | 0    | 0    | 0 | 0 | 0    | 0    | 0    | 0    | 0    | 0    | 0 | 0    | 0    | 0    | 0    | 0    | 0    | 0    | 0    | 0    |      |   |
| I    | 0  | 0    | 0    | 0 | 0    | 0    | 0    | 0.37 | 0    | 0    | 0    | 1.00 | 0.50 | 1.15 | 0.93 | 0    | 1.26 | 0    | 0.63 | 0.50 | 0    | 0 | 0 | 0    | 0    | 0    | 0    | 0    | 0    | 0 | 0    | 0    | 0    | 0    | 0    | 0    | 0    | 0    | 0    |      |   |
| J    | 0  | 0    | 0    | 0 | 0    | 0.11 | 0    | 0    | 0.44 | 0    | 0    | 1.19 | 0.61 | 1.48 | 0.70 | 0.11 | 0.89 | 0    | 1.17 | 0    | 0    | 0 | 0 | 0    | 0    | 0    | 0    | 0    | 0    | 0 | 0    | 0    | 0    | 0    | 0    | 0    | 0    | 0    | 0    |      |   |
| K    | 0  | 0    | 0    | 0 | 0    | 0    | 0    | 0    | 0.33 | 0    | 0    | 1.81 | 0.83 | 0    | 1.56 | 1.56 | 0.22 | 0.41 | 0    | 0.25 | 0.83 | 0 | 0 | 0    | 0    | 0    | 0    | 0    | 0    | 0 | 0    | 0    | 0    | 0    | 0    | 0    | 0    | 0    | 0    | 0    |   |
| L    | 0  | 0    | 0    | 0 | 0    | 0    | 0    | 0    | 0.33 | 0    | 0    | 1.30 | 0.78 | 1.11 | 0    | 0.44 | 0    | 0.37 | 0    | 0.33 | 0    | 0 | 0 | 0    | 0    | 0    | 0    | 0    | 0    | 0 | 0    | 0    | 0    | 0    | 0    | 0    | 0    | 0    | 0    | 0    |   |
| M    | 0  | 0    | 0    | 0 | 0    | 0    | 0    | 0    | 0.33 | 0    | 0    | 1.15 | 0    | 0.11 | 0.74 | 0    | 0    | 0.78 | 0    | 0    | 0    | 0 | 0 | 0    | 0    | 0    | 0    | 0    | 0    | 0 | 0    | 0    | 0    | 0    | 0    | 0    | 0    | 0    | 0    | 0    |   |
| N    | 0  | 0    | 0    | 0 | 0    | 0    | 0    | 0.25 | 0.74 | 0    | 0.33 | 1.78 | 1.22 | 0.52 | 0.67 | 0    | 0.22 | 0.67 | 0    | 0    | 0    | 0 | 0 | 0    | 0    | 0    | 0    | 0    | 0    | 0 | 0    | 0    | 0    | 1.50 | 2    | 0    | 1.33 | 2.22 | 0    |      |   |
| O    | 0  | 0    | 0    | 0 | 0    | 0    | 0    | 0    | 0.44 | 0.17 | 0.56 | 0    | 0    | 0.22 | 0.52 | 0    | 0    | 0.67 | 0    | 0    | 0    | 0 | 0 | 0    | 0    | 0    | 0    | 0    | 0    | 0 | 0    | 0    | 1.33 | 1.56 | 0    | 1.78 | 0.50 | 1.33 |      |      |   |
| P    | 0  | 0    | 0    | 0 | 0    | 0.33 | 0    | 0    | 0.22 | 0    | 0.89 | 2.17 | 0.67 | 1.28 | 0.22 | 0    | 0.67 | 0    | 0.38 | 0    | 0    | 0 | 0 | 0    | 0    | 0    | 0    | 0    | 0    | 0 | 0    | 0    | 0    | 0    | 0    | 0    | 0    | 0    | 0    |      |   |
| Q    | 0  | 0    | 0    | 0 | 0    | 0    | 0    | 0    | 0.22 | 0    | 1.75 | 1.29 | 0    | 0.67 | 0    | 0.14 | 0.63 | 0    | 0    | 0    | 0    | 0 | 0 | 0    | 0    | 0    | 0    | 0    | 0    | 0 | 0    | 0    | 0    | 0    | 0    | 0    | 0    | 0    | 0    | 0    |   |
| R    | 0  | 0    | 0    | 0 | 0    | 0.54 | 0    | 0    | 0.44 | 0    | 0    | 0.71 | 0.08 | 0    | 0.17 | 0.21 | 0.86 | 0.38 | 1.06 | 0    | 0.88 | 0 | 0 | 0    | 0    | 0    | 0    | 0    | 0    | 0 | 0    | 0    | 0    | 0    | 0    | 0    | 0    | 0    | 0    | 0    |   |
| S    | 0  | 0    | 0    | 0 | 0    | 1.52 | 0.33 | 1.00 | 0.08 | 0.52 | 1.5  | 0    | 0    | 0    | 0    | 0.15 | 0    | 0.11 | 0    | 0.75 | 0.75 | 0 | 0 | 0    | 0    | 0    | 0    | 0    | 0    | 0 | 0    | 0    | 0    | 0    | 0    | 0    | 0    | 0    | 0    | 0    |   |
| T    | 0  | 0    | 0    | 0 | 0    | 1.06 | 0    | 0.50 | 1.13 | 0.44 | 0.69 | 0    | 0    | 0.38 | 0.5  | 0    | 0.50 | 0    | 0    | 0    | 0    | 0 | 0 | 0    | 0    | 0    | 0    | 0    | 0    | 0 | 0    | 0    | 0    | 0    | 0    | 0    | 0    | 0    | 0    |      |   |
| U    | 0  | 0    | 0    | 0 | 0    | 0    | 0    | 0    | 0.44 | 0.41 | 0    | 0    | 0.46 | 1.28 | 0    | 0.33 | 0.75 | 0    | 0    | 0    | 0    | 0 | 0 | 0    | 0    | 0    | 0    | 0    | 0    | 0 | 0    | 0    | 0    | 0    | 0    | 0    | 0    | 0    | 0    |      |   |
| V    | 0  | 0    | 0    | 0 | 0    | 0    | 0    | 0    | 0.36 | 0    | 0    | 0    | 0.33 | 0.67 | 0    | 0    | 0    | 0    | 0    | 0    | 0    | 0 | 0 | 0    | 0    | 0    | 0    | 0    | 0    | 0 | 0    | 0    | 0    | 0    | 0    | 0    | 0    | 0    | 0    |      |   |
| W    | 0  | 0    | 0    | 0 | 0    | 1.04 | 0.67 | 0.94 | 0.67 | 0.85 | 0.54 | 0    | 0    | 0    | 0    | 0    | 0    | 0    | 0    | 0.22 | 1.83 | 0 | 0 | 0    | 0    | 0    | 0    | 0    | 0    | 0 | 0    | 0    | 0    | 0    | 0    | 0    | 0    | 0    | 0    |      |   |
| X    | 0  | 0    | 0    | 0 | 0    | 0    | 0    | 0    | 0.22 | 0    | 0.63 | 1.11 | 1.61 | 1.37 | 0    | 0.78 | 0.41 | 0    | 0.88 | 0.58 | 0    | 0 | 0 | 0    | 0    | 0    | 0    | 0    | 0    | 0 | 0    | 0    | 0    | 0    | 0    | 0    | 0    | 0    | 0    |      |   |
| Y    | 0  | 0    | 0    | 0 | 0    | 0.28 | 0    | 0    | 1.06 | 0.22 | 0    | 0    | 0.33 | 0    | 0    | 0    | 0    | 0    | 0.63 | 0    | 0    | 0 | 0 | 0    | 0    | 0    | 0    | 0    | 0    | 0 | 0    | 0    | 0    | 0    | 0    | 0    | 0    | 0    | 0    |      |   |
| Z    | 0  | 0    | 0    | 0 | 0    | 0    | 0    | 0    | 0    | 0    | 0    | 0    | 0    | 0    | 0    | 0.56 | 0    | 0    | 0.96 | 0    | 0    | 0 | 0 | 0    | 0    | 0    | 0    | 0    | 0    | 0 | 0    | 0    | 0    | 0    | 0    | 0    | 0    | 0    |      |      |   |
| a    | 0  | 0    | 0    | 0 | 0    | 0    | 0    | 0    | 0    | 0    | 0    | 0    | 0    | 0    | 0    | 0    | 0    | 0    | 0    | 0    | 0    | 0 | 0 | 0    | 0    | 0    | 0    | 0    | 0    | 0 | 0    | 0    | 0    | 0    | 0    | 0    | 0    | 0    |      |      |   |
| b    | 0  | 0    | 0    | 0 | 0    | 0    | 0    | 0    | 0    | 0    | 0    | 0    | 0    | 0    | 0    | 0    | 0    | 0    | 0    | 0    | 0    | 0 | 0 | 0    | 0    | 0    | 0    | 0    | 0    | 0 | 0    | 0    | 0    | 0    | 0    | 0    | 0    | 0    |      |      |   |
| c    | 0  | 0    | 0    | 0 | 0    | 0    | 0    | 0    | 0    | 0    | 0    | 0    | 0    | 0    | 0    | 0    | 0    | 0    | 0    | 0    | 0    | 0 | 0 | 0    | 0    | 0    | 0    | 0    | 0    | 0 | 0    | 0    | 0    | 0    | 0    | 0    | 0    | 0    |      |      |   |
| d    | 0  | 0    | 0    | 0 | 0    | 0    | 0    | 0    | 0    | 0    | 0    | 0    | 0    | 0    | 0    | 0    | 0    | 0    | 0    | 0    | 0    | 0 | 0 | 0    | 0    | 0    | 0    | 0    | 0    | 0 | 0    | 0    | 0    | 0    | 0    | 0    | 0    | 0    |      |      |   |
| e    | 0  | 0    | 0    | 0 | 0    | 0    | 0    | 0    | 0    | 0    | 0    | 0    | 0    | 0    | 0    | 0    | 0    | 0    | 0    | 0    | 0    | 0 | 0 | 0    | 0    | 0    | 0    | 0    | 0    | 0 | 0    | 0    | 0    | 0    | 0    | 0    | 0    | 0    |      |      |   |
| f    | 0  | 0    | 0    | 0 | 0    | 0    | 0    | 0    | 0    | 0    | 0    | 0    | 0    | 0    | 0    | 0    | 0    | 0    | 0    | 0    | 0    | 0 | 0 | 0    | 0    | 0    | 0    | 0    | 0    | 0 | 0    | 0    | 0    | 0    | 0    | 0    | 0    | 0    |      |      |   |
| g    | 0  | 0    | 0    | 0 | 0    | 0    | 0    | 0    | 0    | 0    | 0    | 0    | 0    | 0    | 0    | 0    | 0    | 0    | 0    | 0    | 0    | 0 | 0 | 0    | 0    | 0    | 0    | 0    | 0    | 0 | 0    | 0    | 0    | 0    | 0    | 0    | 0    | 0    |      |      |   |
| h    | 0  | 0    | 0    | 0 | 0    | 0    | 0    | 0    | 0    | 0    | 0    | 0    | 0    | 0    | 0    | 0    | 0    | 0    | 0    | 0    | 0    | 0 | 0 | 0    | 0    | 0    | 0    | 0    | 0    | 0 | 0    | 0    | 0    | 0    | 0    | 0    | 0    | 0    |      |      |   |
| i    | 0  | 0    | 0    | 0 | 0    | 0    | 0    | 0    | 0    | 0    | 0    | 0    | 0    | 0    | 0    | 0    | 0    | 0    | 0    | 0    | 0    | 0 | 0 | 0    | 0    | 0    | 0    | 0    | 0    | 0 | 0    | 0    | 0    | 0    | 0    | 0    | 0    | 0    |      |      |   |
| j    | 0  | 0    | 0    | 0 | 0    | 0    | 0    | 0    | 0    | 0    | 0    | 0    | 0    | 0    | 0    | 0    | 0    | 0    | 0    | 0    | 0    | 0 | 0 | 0    | 0    | 0    | 0    | 0    | 0    | 0 | 0    | 0    | 0    | 0    | 0    | 0    | 0    | 0    |      |      |   |
| k    | 0  | 0    | 0    | 0 | 0    | 0    | 0    | 0    | 0    | 0    | 0    | 0    | 0    | 0    | 0    | 0    | 0    | 0    | 0    | 0    | 0    | 0 | 0 | 0    | 0    | 0    | 0    | 0    | 0    | 0 | 0    | 0    | 0    | 0    | 0    | 0    | 0    | 0    |      |      |   |

Table S4.: DMM: Descriptors to REMix parameters

| ID     | 1 | 2 | 3 | 4 | 5 | 6 | 7 | 8 | 9 | 10 | 11 | 12 | 13 | 14 | 15 | 16 | 17 | 18 | 19 | 20 | 21 | 22 | 23 | 24 | 25 | 26 | 27 | 28 | 29 |
|--------|---|---|---|---|---|---|---|---|---|----|----|----|----|----|----|----|----|----|----|----|----|----|----|----|----|----|----|----|----|
| A(I)   | 0 | 0 | 0 | 0 | 0 | 0 | 0 | 0 | 0 | 0  | 0  | 0  | 1  | 1  | 1  | 0  | 1  | 1  | 0  | 0  | 0  | 0  | 0  | 0  | 0  | 0  | 0  | 0  | 0  |
| A(II)  | 0 | 0 | 0 | 0 | 0 | 0 | 0 | 0 | 0 | 0  | 0  | 0  | 1  | 0  | 0  | 0  | 0  | 0  | 0  | 0  | 0  | 0  | 0  | 0  | 0  | 0  | 0  | 0  | 0  |
| A(III) | 0 | 0 | 0 | 0 | 0 | 0 | 0 | 0 | 0 | 0  | 0  | 0  | 0  | 0  | 1  | 0  | 0  | 0  | 0  | 0  | 0  | 0  | 0  | 0  | 0  | 0  | 0  | 0  | 0  |
| B      | 0 | 0 | 0 | 1 | 1 | 0 | 0 | 0 | 0 | 0  | 0  | 0  | 0  | 0  | 0  | 0  | 0  | 0  | 0  | 0  | 0  | 0  | 1  | 1  | 0  | 0  | 0  | 0  | 0  |
| C      | 0 | 0 | 0 | 0 | 0 | 0 | 0 | 0 | 0 | 0  | 0  | 0  | 0  | 0  | 0  | 0  | 1  | 1  | 0  | 0  | 0  | 0  | 0  | 0  | 0  | 0  | 0  | 0  | 0  |
| D      | 0 | 0 | 0 | 0 | 0 | 0 | 0 | 0 | 0 | 0  | 0  | 0  | 0  | 0  | 1  | 0  | 1  | 1  | 0  | 0  | 0  | 0  | 0  | 0  | 0  | 0  | 0  | 0  | 0  |
| E      | 0 | 0 | 0 | 0 | 0 | 0 | 0 | 0 | 0 | 0  | 0  | 0  | 0  | 0  | 0  | 0  | 1  | 0  | 0  | 0  | 0  | 0  | 0  | 0  | 0  | 0  | 0  | 0  | 0  |
| F      | 0 | 0 | 0 | 0 | 0 | 0 | 0 | 0 | 0 | 0  | 0  | 0  | 0  | 0  | 0  | 0  | 1  | 0  | 0  | 0  | 0  | 0  | 0  | 0  | 0  | 0  | 1  | 0  | 0  |
| G      | 0 | 0 | 0 | 0 | 0 | 1 | 1 | 0 | 0 | 1  | 0  | 0  | 0  | 0  | 0  | 0  | 1  | 1  | 0  | 0  | 0  | 0  | 0  | 0  | 0  | 0  | 0  | 0  | 0  |
| H      | 0 | 0 | 0 | 0 | 0 | 0 | 0 | 0 | 0 | 0  | 0  | 0  | 0  | 0  | 0  | 0  | 0  | 0  | 0  | 0  | 0  | 0  | 0  | 0  | 0  | 0  | 0  | 0  | 0  |
| I      | 0 | 0 | 0 | 0 | 0 | 0 | 0 | 0 | 0 | 0  | 0  | 0  | 0  | 0  | 0  | 0  | 0  | 0  | 0  | 0  | 0  | 0  | 1  | 1  | 0  | 0  | 0  | 0  | 0  |
| J      | 0 | 0 | 0 | 0 | 0 | 1 | 0 | 0 | 0 | 0  | 0  | 0  | 0  | 0  | 0  | 0  | 0  | 0  | 0  | 0  | 0  | 0  | 1  | 0  | 0  | 0  | 0  | 0  | 0  |
| K      | 0 | 0 | 0 | 0 | 0 | 1 | 0 | 0 | 0 | 0  | 0  | 0  | 0  | 0  | 0  | 0  | 0  | 0  | 0  | 0  | 0  | 0  | 0  | 0  | 0  | 0  | 0  | 0  | 0  |
| L      | 0 | 0 | 0 | 0 | 1 | 0 | 0 | 0 | 0 | 0  | 0  | 0  | 0  | 0  | 0  | 0  | 0  | 0  | 0  | 0  | 0  | 1  | 0  | 1  | 0  | 0  | 0  | 0  | 0  |
| M      | 0 | 0 | 0 | 0 | 0 | 0 | 0 | 0 | 0 | 0  | 0  | 0  | 0  | 0  | 0  | 0  | 0  | 0  | 0  | 0  | 0  | 0  | 0  | 0  | 0  | 0  | 0  | 0  | 0  |
| N      | 0 | 0 | 0 | 0 | 0 | 1 | 0 | 0 | 0 | 0  | 0  | 0  | 0  | 0  | 0  | 0  | 0  | 0  | 0  | 0  | 0  | 0  | 1  | 0  | 0  | 0  | 0  | 0  | 0  |
| O      | 0 | 0 | 0 | 0 | 0 | 1 | 0 | 0 | 0 | 0  | 0  | 0  | 0  | 1  | 0  | 0  | 1  | 0  | 0  | 0  | 0  | 0  | 0  | 0  | 0  | 0  | 0  | 0  | 0  |
| P      | 0 | 0 | 0 | 0 | 0 | 0 | 0 | 0 | 0 | 0  | 0  | 0  | 0  | 0  | 0  | 0  | 0  | 0  | 0  | 0  | 0  | 0  | 1  | 0  | 0  | 0  | 0  | 0  | 0  |
| Q      | 1 | 0 | 0 | 0 | 0 | 0 | 0 | 0 | 0 | 0  | 0  | 0  | 0  | 0  | 0  | 0  | 0  | 0  | 0  | 0  | 0  | 0  | 1  | 0  | 0  | 0  | 0  | 0  | 0  |
| R      | 0 | 0 | 0 | 0 | 0 | 0 | 0 | 0 | 0 | 0  | 0  | 0  | 0  | 0  | 0  | 0  | 0  | 0  | 0  | 0  | 0  | 0  | 0  | 0  | 0  | 0  | 0  | 0  | 0  |
| S      | 0 | 0 | 0 | 0 | 0 | 0 | 0 | 0 | 0 | 0  | 0  | 0  | 0  | 0  | 0  | 0  | 0  | 0  | 0  | 0  | 0  | 0  | 0  | 0  | 0  | 0  | 0  | 0  | 0  |
| T      | 0 | 0 | 0 | 0 | 0 | 0 | 0 | 0 | 0 | 0  | 0  | 0  | 0  | 0  | 0  | 0  | 1  | 1  | 0  | 0  | 0  | 0  | 0  | 0  | 0  | 0  | 0  | 0  | 0  |
| U      | 1 | 0 | 0 | 0 | 0 | 1 | 0 | 0 | 0 | 0  | 0  | 0  | 0  | 0  | 0  | 0  | 0  | 0  | 0  | 0  | 0  | 0  | 0  | 1  | 0  | 0  | 0  | 0  | 0  |
| V      | 0 | 0 | 0 | 0 | 0 | 0 | 0 | 0 | 0 | 0  | 0  | 0  | 0  | 0  | 0  | 0  | 1  | 1  | 0  | 0  | 0  | 0  | 0  | 0  | 0  | 0  | 1  | 1  | 1  |
| W      | 0 | 0 | 0 | 0 | 0 | 0 | 0 | 0 | 0 | 0  | 0  | 0  | 0  | 0  | 0  | 0  | 0  | 0  | 0  | 0  | 0  | 0  | 0  | 0  | 0  | 0  | 0  | 0  | 0  |
| X      | 1 | 0 | 0 | 0 | 0 | 1 | 0 | 0 | 0 | 0  | 0  | 0  | 0  | 0  | 0  | 0  | 0  | 0  | 0  | 0  | 0  | 0  | 0  | 1  | 0  | 0  | 0  | 0  | 0  |
| Y      | 0 | 0 | 0 | 0 | 0 | 0 | 0 | 0 | 0 | 0  | 0  | 0  | 0  | 0  | 0  | 0  | 1  | 1  | 0  | 0  | 0  | 0  | 0  | 0  | 0  | 0  | 0  | 0  | 0  |
| Z      | 0 | 0 | 0 | 0 | 0 | 0 | 0 | 0 | 0 | 0  | 0  | 0  | 0  | 0  | 0  | 0  | 0  | 0  | 0  | 0  | 0  | 0  | 0  | 0  | 0  | 0  | 0  | 0  | 0  |
| a      | 0 | 0 | 0 | 0 | 0 | 0 | 0 | 0 | 0 | 0  | 0  | 0  | 0  | 0  | 0  | 0  | 1  | 0  | 0  | 0  | 0  | 0  | 0  | 0  | 0  | 0  | 1  | 0  | 0  |
| b      | 0 | 0 | 0 | 0 | 0 | 0 | 0 | 0 | 0 | 0  | 0  | 0  | 0  | 0  | 0  | 0  | 0  | 1  | 0  | 0  | 0  | 0  | 0  | 0  | 0  | 0  | 0  | 0  | 0  |
| c      | 0 | 0 | 0 | 0 | 0 | 0 | 0 | 0 | 0 | 0  | 0  | 0  | 0  | 0  | 0  | 0  | 0  | 1  | 0  | 0  | 0  | 0  | 0  | 0  | 0  | 0  | 0  | 0  | 0  |
| d      | 0 | 0 | 0 | 0 | 0 | 0 | 0 | 0 | 0 | 0  | 0  | 0  | 0  | 0  | 0  | 0  | 1  | 0  | 0  | 0  | 0  | 0  | 0  | 0  | 0  | 0  | 1  | 1  | 0  |
| e      | 0 | 0 | 0 | 0 | 0 | 0 | 0 | 0 | 0 | 0  | 0  | 0  | 0  | 0  | 0  | 0  | 1  | 0  | 0  | 0  | 0  | 0  | 0  | 0  | 0  | 0  | 1  | 1  | 0  |
| f      | 0 | 0 | 0 | 0 | 0 | 0 | 0 | 0 | 0 | 0  | 0  | 0  | 0  | 0  | 0  | 0  | 1  | 0  | 0  | 0  | 0  | 0  | 0  | 0  | 0  | 0  | 1  | 1  | 0  |
| g      | 0 | 0 | 0 | 0 | 0 | 0 | 0 | 0 | 0 | 0  | 0  | 0  | 0  | 0  | 0  | 0  | 0  | 0  | 0  | 0  | 0  | 0  | 0  | 0  | 0  | 0  | 0  | 0  | 0  |
| h      | 0 | 0 | 0 | 0 | 0 | 0 | 0 | 0 | 0 | 0  | 0  | 0  | 0  | 0  | 0  | 0  | 0  | 1  | 0  | 0  | 0  | 0  | 0  | 0  | 0  | 0  | 0  | 0  | 0  |
| i      | 0 | 0 | 0 | 0 | 0 | 0 | 0 | 0 | 0 | 0  | 0  | 0  | 0  | 0  | 0  | 0  | 0  | 1  | 0  | 0  | 0  | 0  | 0  | 0  | 0  | 0  | 0  | 0  | 0  |
| j      | 0 | 0 | 0 | 0 | 0 | 0 | 0 | 0 | 0 | 0  | 0  | 0  | 0  | 0  | 0  | 0  | 0  | 0  | 0  | 0  | 0  | 0  | 0  | 0  | 0  | 0  | 0  | 0  | 0  |
| k      | 0 | 0 | 0 | 0 | 0 | 0 | 0 | 0 | 0 | 0  | 0  | 0  | 0  | 0  | 0  | 0  | 0  | 0  | 0  | 0  | 0  | 0  | 0  | 0  | 0  | 0  | 0  | 0  | 0  |

Table S5.: REMix Parameters-DSM: Indirect Influences

| ID | 1    | 2 | 3 | 4 | 5    | 6     | 7    | 8    | 9 | 10 | 11   | 12 | 13   | 14   | 15   | 16 | 17    | 18    | 19 | 20 | 21 | 22 | 23    | 24    | 25    | 26   | 27    | 28    | 29    |
|----|------|---|---|---|------|-------|------|------|---|----|------|----|------|------|------|----|-------|-------|----|----|----|----|-------|-------|-------|------|-------|-------|-------|
| 1  | 3.85 | 0 | 0 | 0 | 0    | 0     | 0    | 0    | 0 | 0  | 0    | 0  | 0    | 0    | 0    | 0  | 0     | 0     | 0  | 0  | 0  | 0  | 0     | 0     | 0     | 0    | 0     | 0     | 0     |
| 2  | 0    | 0 | 0 | 0 | 0    | 0     | 0    | 0    | 0 | 0  | 0    | 0  | 0    | 0    | 0    | 0  | 0     | 0     | 0  | 0  | 0  | 0  | 0     | 0     | 0     | 0    | 0     | 0     | 0     |
| 3  | 0    | 0 | 0 | 0 | 0    | 0     | 0    | 0    | 0 | 0  | 0    | 0  | 0    | 0    | 0    | 0  | 0     | 0     | 0  | 0  | 0  | 0  | 0     | 0     | 0     | 0    | 0     | 0     | 0     |
| 4  | 1.04 | 0 | 0 | 0 | 0    | 0.48  | 0.96 | 0.96 | 0 | 0  | 0.96 | 0  | 0    | 0.85 | 0    | 0  | 5.58  | 2.34  | 0  | 0  | 0  | 0  | 3.84  | 2.20  | 0.48  | 2.04 | 0     | 0     | 0     |
| 5  | 2.82 | 0 | 0 | 0 | 0.48 | 6.46  | 1.30 | 1.30 | 0 | 0  | 1.30 | 0  | 0    | 1.22 | 0    | 0  | 6.79  | 4.84  | 0  | 0  | 0  | 0  | 6.25  | 4.94  | 0.48  | 3.33 | 2.67  | 1.67  | 2.17  |
| 6  | 6.47 | 0 | 0 | 0 | 6.69 | 19.56 | 2.63 | 2.63 | 0 | 0  | 2.63 | 0  | 0    | 2.68 | 0.61 | 0  | 20.75 | 14.71 | 0  | 0  | 0  | 0  | 19.33 | 8.70  | 11.02 | 4.52 | 12.94 | 11.36 | 7.97  |
| 7  | 0.78 | 0 | 0 | 0 | 0.26 | 0.78  | 0    | 0    | 0 | 0  | 0    | 0  | 0    | 0    | 0.50 | 0  | 4.39  | 2.50  | 0  | 0  | 0  | 0  | 0.26  | 0.78  | 0.26  | 0    | 2     | 2     | 0     |
| 8  | 0.78 | 0 | 0 | 0 | 0.26 | 0.78  | 0    | 0    | 0 | 0  | 0    | 0  | 0    | 0    | 0.50 | 0  | 4.39  | 2.50  | 0  | 0  | 0  | 0  | 0.26  | 0.78  | 0.26  | 0    | 2     | 2     | 0     |
| 9  | 0    | 0 | 0 | 0 | 0    | 0     | 0    | 0    | 0 | 0  | 0    | 0  | 0    | 0    | 0    | 0  | 0     | 0     | 0  | 0  | 0  | 0  | 0     | 0     | 0     | 0    | 0     | 0     | 0     |
| 10 | 0    | 0 | 0 | 0 | 0    | 0     | 0    | 0    | 0 | 0  | 0    | 0  | 0    | 0    | 0    | 0  | 0     | 0     | 0  | 0  | 0  | 0  | 0     | 0     | 0     | 0    | 0     | 0     | 0     |
| 11 | 0.78 | 0 | 0 | 0 | 0.26 | 0.78  | 0    | 0    | 0 | 0  | 0    | 0  | 0    | 0    | 0.50 | 0  | 4.39  | 2.50  | 0  | 0  | 0  | 0  | 0.26  | 0.78  | 0.26  | 0    | 2     | 2     | 0     |
| 12 | 0    | 0 | 0 | 0 | 0    | 0     | 0    | 0    | 0 | 0  | 0    | 0  | 0    | 0    | 0    | 0  | 0     | 0     | 0  | 0  | 0  | 0  | 0     | 0     | 0     | 0    | 0     | 0     | 0     |
| 13 | 2.00 | 0 | 0 | 0 | 0.59 | 5.32  | 1.28 | 1.28 | 0 | 0  | 1.28 | 0  | 0.67 | 0.44 | 3.75 | 0  | 13.68 | 5.81  | 0  | 0  | 0  | 0  | 1.32  | 1.38  | 1.59  | 0    | 7.31  | 6.79  | 1.67  |
| 14 | 1.17 | 0 | 0 | 0 | 0.22 | 3.01  | 1.28 | 1.28 | 0 | 0  | 1.28 | 0  | 0.67 | 0.44 | 3.42 | 0  | 12.54 | 6.06  | 0  | 0  | 0  | 0  | 0.90  | 1.72  | 1.56  | 0.56 | 8.28  | 6.76  | 2.92  |
| 15 | 1.47 | 0 | 0 | 0 | 0.41 | 3.54  | 1.28 | 1.28 | 0 | 0  | 1.28 | 0  | 0.67 | 0.44 | 3.42 | 0  | 15.37 | 9.90  | 0  | 0  | 0  | 0  | 0.53  | 1.47  | 0.41  | 0    | 6.98  | 5.29  | 2.00  |
| 16 | 0    | 0 | 0 | 0 | 0    | 0     | 0    | 0    | 0 | 0  | 0    | 0  | 0    | 0    | 0    | 0  | 0     | 0     | 0  | 0  | 0  | 0  | 0     | 0     | 0     | 0    | 0     | 0     | 0     |
| 17 | 6.68 | 0 | 0 | 0 | 1.65 | 12.65 | 3.86 | 3.86 | 0 | 0  | 3.86 | 0  | 0.67 | 0.94 | 5.19 | 0  | 57.30 | 33.23 | 0  | 0  | 0  | 0  | 2.33  | 7.24  | 6.98  | 0.56 | 28.49 | 16.91 | 10.15 |
| 18 | 5.79 | 0 | 0 | 0 | 1.43 | 10.65 | 2.75 | 2.75 | 0 | 0  | 2.75 | 0  | 0.67 | 0.94 | 4.81 | 0  | 43.46 | 29.83 | 0  | 0  | 0  | 0  | 1.55  | 5.79  | 4.43  | 0.00 | 21.47 | 12.38 | 11.78 |
| 19 | 0    | 0 | 0 | 0 | 0    | 0     | 0    | 0    | 0 | 0  | 0    | 0  | 0    | 0    | 0    | 0  | 0     | 0     | 0  | 0  | 0  | 0  | 0     | 0     | 0     | 0    | 0     | 0     | 0     |
| 20 | 0    | 0 | 0 | 0 | 0    | 0     | 0    | 0    | 0 | 0  | 0    | 0  | 0    | 0    | 0    | 0  | 0     | 0     | 0  | 0  | 0  | 0  | 0     | 0     | 0     | 0    | 0     | 0     | 0     |
| 21 | 0    | 0 | 0 | 0 | 0    | 0     | 0    | 0    | 0 | 0  | 0    | 0  | 0    | 0    | 0    | 0  | 0     | 0     | 0  | 0  | 0  | 0  | 0     | 0     | 0     | 0    | 0     | 0     | 0     |
| 22 | 0    | 0 | 0 | 0 | 0    | 0     | 0    | 0    | 0 | 0  | 0    | 0  | 0    | 0    | 0    | 0  | 0     | 0     | 0  | 0  | 0  | 0  | 0     | 0     | 0     | 0    | 0     | 0     | 0     |
| 23 | 9.67 | 0 | 0 | 0 | 5.57 | 26.67 | 3.30 | 3.30 | 0 | 0  | 3.30 | 0  | 0    | 4.40 | 0.44 | 0  | 14.66 | 11.01 | 0  | 0  | 0  | 0  | 25.30 | 13.79 | 6.91  | 7.49 | 4.92  | 3.67  | 4.39  |
| 24 | 4.89 | 0 | 0 | 0 | 4.28 | 14.02 | 2.00 | 2.00 | 0 | 0  | 2.00 | 0  | 0    | 0.37 | 0    | 0  | 12.09 | 4.44  | 0  | 0  | 0  | 0  | 12.99 | 5.18  | 5.94  | 2.67 | 5.22  | 4.22  | 1.06  |
| 25 | 1.78 | 0 | 0 | 0 | 0    | 4.04  | 0.33 | 0.33 | 0 | 0  | 0.33 | 0  | 0    | 0.37 | 0    | 0  | 1.70  | 2.50  | 0  | 0  | 0  | 0  | 2.41  | 2.74  | 0     | 1.30 | 1.00  | 0     | 2.17  |
| 26 | 1.35 | 0 | 0 | 0 | 1.15 | 3.85  | 0.37 | 0.37 | 0 | 0  | 0.37 | 0  | 0    | 1.26 | 0    | 0  | 1.63  | 0.37  | 0  | 0  | 0  | 0  | 2.77  | 0.72  | 1.15  | 0    | 0     | 0     | 0     |
| 27 | 1.25 | 0 | 0 | 0 | 0.67 | 2.39  | 0.81 | 0.81 | 0 | 0  | 0.81 | 0  | 0    | 0    | 0    | 0  | 6.76  | 5.72  | 0  | 0  | 0  | 0  | 0.67  | 1.25  | 3.67  | 0    | 2.04  | 0.67  | 3.33  |
| 28 | 1.25 | 0 | 0 | 0 | 0.67 | 1.94  | 0.36 | 0.36 | 0 | 0  | 0.36 | 0  | 0    | 0    | 0    | 0  | 4.57  | 4.36  | 0  | 0  | 0  | 0  | 0.67  | 1.25  | 3.67  | 0    | 1.38  | 0     | 3.33  |
| 29 | 1.25 | 0 | 0 | 0 | 0.67 | 1.94  | 0.36 | 0.36 | 0 | 0  | 0.36 | 0  | 0    | 0    | 0    | 0  | 3.90  | 8.75  | 0  | 0  | 0  | 0  | 0.67  | 1.25  | 1.67  | 0    | 1.38  | 0     | 5.89  |



## B REMix Model - Myopic vs Static Implementation

### Objective Function

In the objective function (eq. B.1) costs of all used technologies (*Techs*) are summarised to overall system costs per optimisation year, which are constituted by investment ( $C_{Invest}$ ), operation ( $C_{Op}$ ), fuel ( $C_{Fuel}$ ), and pollution ( $C_{Pollution}$ ) costs, as well as penalties for not supplied power ( $C_{NotSupplPower}$ ). Investment costs of pre-installed capacities are not considered in the optimisation process; for newly added capacities these are considered by applying the method of equivalent annual cost over amortisation time. Operation costs contain fixed and variable costs - dependent on the added and utilised capacities respectively, as well as, tear and wear costs - proportional to the power change.

$$\min \left\{ \sum_{tech} \sum_{node} \left[ C_{Invest}^{tech,node,year} + \sum_{time} \left( C_{Op}^{tech,node,time,year} + C_{Fuel}^{tech,node,time,year} + C_{Pollution}^{tech,node,time,year} \right) \right] + C_{NotSupplPower} \right\} \quad (B.1)$$

$\forall year \in OptimisedYears$

### Model Enhancement: Myopic approach

Starting from the existing static model, the possibility of using added capacities from earlier simulations is introduced. For instance, capacities added in 2020 are part of the pre-installed capacities in 2030, as long as their lifetime has not expired. New capacities can be added in 2030, which are taken into account for 2050. The approach is thus based on the forwarding of added capacities from earlier simulations ( $P_{CapsAdded}^{year'}$ ), which together with the still available pre-installed capacities ( $P_{CapsInst}^{year}$ ) represent the total input capacities ( $P_{CapsTotal}^{year}$ ) for the optimised year (see eq. B.2 and Fig. S1). With this goal in mind, a technological lifetime per technology and age is defined.

$$P_{CapsTotal}^{tech,node,year} = P_{CapsInst}^{tech,node,year} + \sum_{year'} P_{CapsAdded}^{tech,node,year'} \mid year' + LifeTime > year \quad (B.2)$$

$\forall year \in OptimisedYears, \forall tech \in Techs, \forall node \in Node$

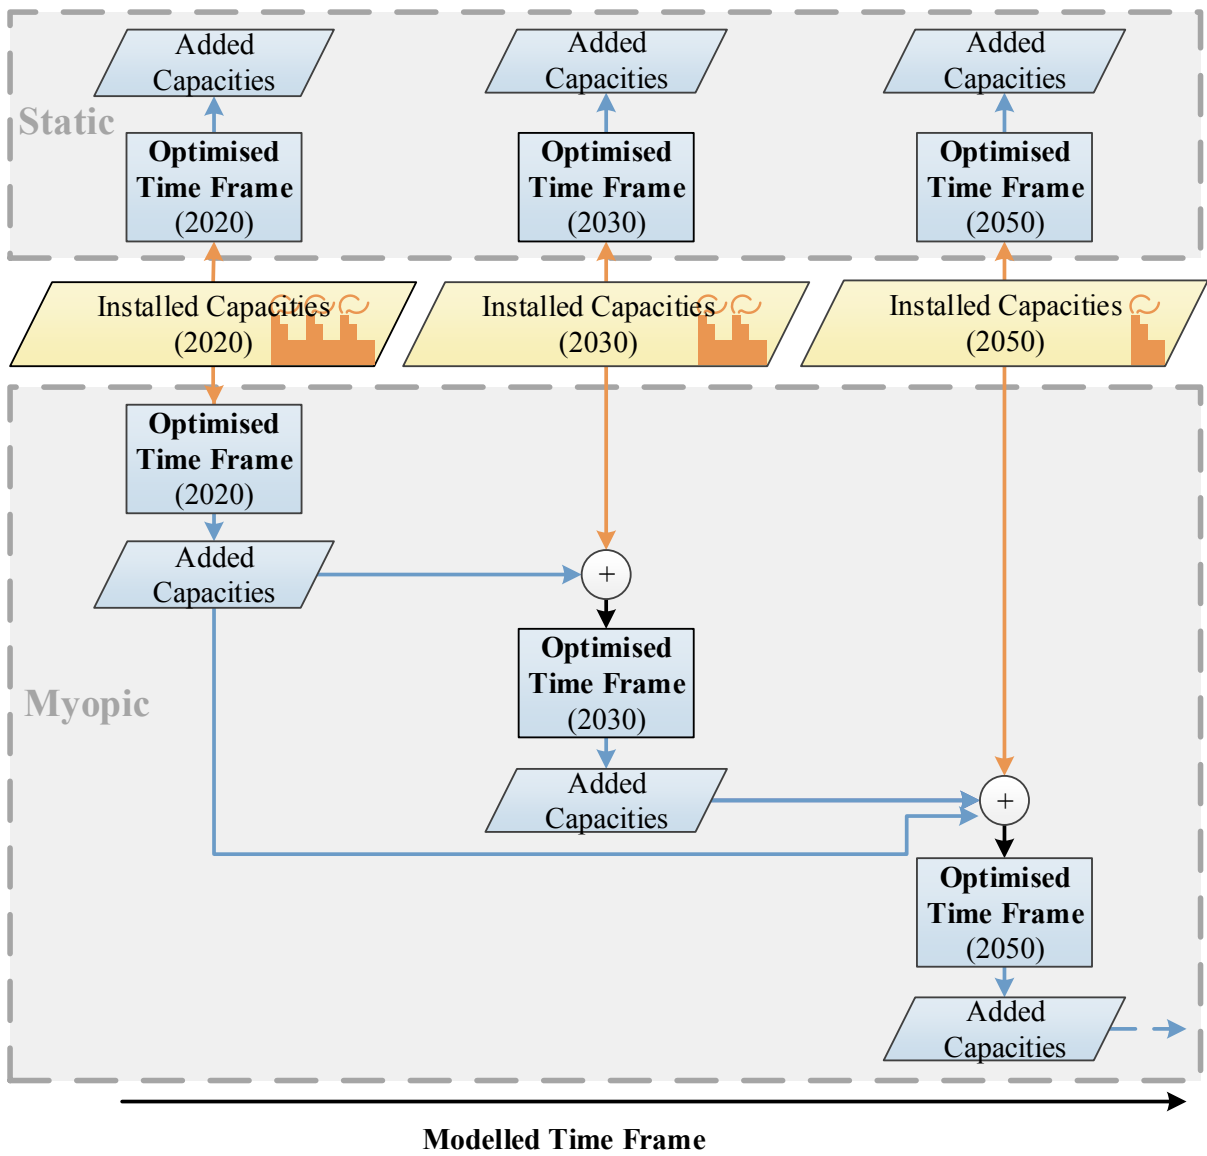

Figure S1.: Scheme of static and myopic optimisation procedures

## C Assumptions and Parametrisation

To limit the required computational time, some assumptions and simplifications were made. The influence of electric cars and demand side management was not taken into account endogenously. Heat production and demand, as well as CHP, and energy conversion from geothermal or wave and tidal applications were not considered. Moreover, non-European import or export was not modelled. Further assumptions are detailed in the following lines. All used numerical values that can be published can be found in the supplementary material.

### **RE-share**

The RE-share of final electricity consumption is assumed to at least reach the EU-climate targets, and is defined accordingly for each region. In the REMix module utilised to define the RE-share only the solar and wind generation capacity share could be set, so that the RE-share coming from biomass and hydraulic sources had to be taken into account separately. Based on the National Renewable Energy Action Plans (NREAP) [Eur11b], the regional RE-share for 2020 is defined. From the technology-specific energy production contained in the NREAPs, a European renewable energy share of 41.3% in 2020 is calculated, of which 18.5% originated in solar and wind. For 2030 and 2050 the EU-goals, as mentioned in the Roadmap 2050 for the scenario 'Diversified Supply Technologies' (European Commission 2011) - which best matches with the current assumptions-, are used to extrapolate the RE-share in each model region. The selected EU-goals correspond to 51.2% and 59.1% of RE-sources in final electricity generation. RE-shares in Switzerland and Austria are already high in 2020. Due to limited potentials, no scaling after 2020 is applied. Since these countries have a small share in the total European electricity consumption, and national RE-shares are set as minimum condition, no significant variation of the results is expected through this simplification.

### **Back-up Capacity**

Back-up capacity to ensure momentary load coverage in the EU is aimed to be reached in a global framework. Thus, peak loads are set to be covered within Europe, and not necessarily in single regions.

### **Transmission lines**

Existing transmission lines are assumed to persist during the studied time frame, without need for replacement. Alternating (AC) and direct current (DC) transmission lines are considered in REMix. Installed transmission capacities for both types are set according to the TYNDP [ENT14] for 2020 and 2030, and are maintained constant till 2050. Additionally, DC-

transmission capacity can be optimised from 2030 on, so that necessary infrastructure expansion can take place. Pricing and losses are differentiated for land and sea lines.

### **Technologies**

If not otherwise described for single technologies, power plant deployment paths were defined based on the Platts' data base from 2015 [pla15]. Power plants in operation or standby were aggregated in technology and age groups, and were assumed to retire at the end of their technological lifetime. Plants retiring before 2015 according to this assumption, were set to stop operating in 2020.

### **Conventional Power Plants**

These include: Internal-Combustion engine (IC), lignite and coal fired, nuclear, gas turbine, and Combined-Cycle Gas-Turbine (CCGT) power plants. An efficiency differentiation based on the year the plant entered operation is made. Age aggregations are done in nine-year steps, with plants built before 1970 summarised within a group. Planned nuclear phase-out was also considered on basis of country-specific policies as described in [Wor15].

### **Hydroelectric and Pumped-Storage Power Plants**

Hydroelectric and pumped-storage capacities - with very long lifetimes and limited potential, because of geographical limitations and high economical expenses - were assumed to be constant over the studied time frame. Hence, only historically installed capacities were considered and further construction was not allowed in the model. Installed capacities for conventional hydroelectric storage are extracted from [NPS<sup>+</sup>12].

### **Biomass**

This technology has a limited potential, and is increasingly applied as CHP-plant, which implies a decrease in the efficiency for electricity production. Therefore, even if capacities would increase, it would not directly derive into higher share in electricity production. Based on this, biomass capacity for electricity production is assumed to be replaced at the end of its lifetime, so that capacities are kept constant over the whole time frame.

### **Concentrating Solar Power (CSP)**

Three different CSP-technologies are defined according to their operational flexibility, as in [Sch12]: basic, medium and high. These translate into solar multiples of 1.5, 2.5 and 3.5, and storage size corresponding to a power-block operation-time of 8, 12 and 18 hours, respectively. CSP pre-installed capacities are assigned to the basic flexibility technology according to their characteristics. Optimisation is allowed for all CSP-technologies.

---

### **Fluctuating Renewable Energy**

Run-of-river existing applications are extracted from [NPS<sup>+</sup>12]. Optimisation is allowed for all fluctuating RE-technologies including photovoltaic, onshore and offshore wind. The used normalised time series for hourly-available potential-definition stem from 2006, which has been proven to be a representative reference year in [Tre15].

### **Storage Technologies**

Three storage technologies are defined for type differentiation in duration and frequency of the power supply. Pre-installed capacities are only given for pumped-storage applications (medium-term). For the other two technologies no capacities exist to date, however, capacity optimisation is allowed with no limitations for lithium-ion batteries (short to medium-term); and maximal potentials are provided for hydrogen storage (long-term) from [Sch12].

Table S6.: Maximum installable capacity of offshore wind [MW]

| Region         | Year | MaxInstallable |
|----------------|------|----------------|
| Austria        | 2020 | 0              |
| Belgium        | 2020 | 5579.64        |
| Czech Republic | 2020 | 0              |
| DAMP1          | 2020 | 0              |
| DAMP2          | 2020 | 0              |
| DAMP3          | 2020 | 0              |
| DAMP4          | 2020 | 0              |
| DAMP5          | 2020 | 0              |
| DAMP6          | 2020 | 0              |
| DEnBW1         | 2020 | 0              |
| DEnBW2         | 2020 | 0              |
| Denmark_E      | 2020 | 20937.14       |
| Denmark_W      | 2020 | 103018.93      |
| DTPS0          | 2020 | 57648.16       |
| DTPS1          | 2020 | 0              |
| DTPS2          | 2020 | 0              |
| DTPS3          | 2020 | 0              |
| DTPS4          | 2020 | 0              |
| DTPS5          | 2020 | 0              |
| DTPS6          | 2020 | 0              |
| DVET0          | 2020 | 14343.22       |
| DVET1          | 2020 | 0              |
| DVET2          | 2020 | 0              |
| DVET3          | 2020 | 0              |
| DVET4          | 2020 | 0              |
| Finland        | 2020 | 97748.75       |
| France         | 2020 | 252036.7       |
| Ireland        | 2020 | 222688.87      |
| Italy          | 2020 | 165640.98      |
| Liechtenstein  | 2020 | 0              |
| Luxembourg     | 2020 | 0              |
| Netherlands    | 2020 | 91851.66       |
| Norway         | 2020 | 387828.81      |
| Poland         | 2020 | 49796.13       |
| Portugal       | 2020 | 37778.21       |
| Slovakia       | 2020 | 0              |
| Spain          | 2020 | 101755.97      |
| Sweden         | 2020 | 220970.25      |
| Switzerland    | 2020 | 0              |
| UK             | 2020 | 830014.1       |
| Austria        | 2030 | 0              |
| Belgium        | 2030 | 5579.64        |
| Czech Republic | 2030 | 0              |
| DAMP1          | 2030 | 0              |
| DAMP2          | 2030 | 0              |
| DAMP3          | 2030 | 0              |
| DAMP4          | 2030 | 0              |
| DAMP5          | 2030 | 0              |
| DAMP6          | 2030 | 0              |
| DEnBW1         | 2030 | 0              |
| DEnBW2         | 2030 | 0              |
| Denmark_E      | 2030 | 20937.14       |
| Denmark_W      | 2030 | 103018.93      |
| DTPS0          | 2030 | 57648.16       |
| DTPS1          | 2030 | 0              |
| DTPS2          | 2030 | 0              |
| DTPS3          | 2030 | 0              |
| DTPS4          | 2030 | 0              |
| DTPS5          | 2030 | 0              |
| DTPS6          | 2030 | 0              |
| DVET0          | 2030 | 14343.22       |
| DVET1          | 2030 | 0              |
| DVET2          | 2030 | 0              |
| DVET3          | 2030 | 0              |
| DVET4          | 2030 | 0              |

Table S7.: Maximum installable capacity of offshore wind (continued) [MW]

| Region         | Year | MaxInstallable |
|----------------|------|----------------|
| Finland        | 2030 | 97748.75       |
| France         | 2030 | 252036.7       |
| Ireland        | 2030 | 222688.87      |
| Italy          | 2030 | 165640.98      |
| Liechtenstein  | 2030 | 0              |
| Luxembourg     | 2030 | 0              |
| Netherlands    | 2030 | 91851.66       |
| Norway         | 2030 | 387828.81      |
| Poland         | 2030 | 49796.13       |
| Portugal       | 2030 | 37778.21       |
| Slovakia       | 2030 | 0              |
| Spain          | 2030 | 101755.97      |
| Sweden         | 2030 | 220970.25      |
| Switzerland    | 2030 | 0              |
| UK             | 2030 | 830014.1       |
| Austria        | 2050 | 0              |
| Belgium        | 2050 | 5579.64        |
| Czech Republic | 2050 | 0              |
| DAMP1          | 2050 | 0              |
| DAMP2          | 2050 | 0              |
| DAMP3          | 2050 | 0              |
| DAMP4          | 2050 | 0              |
| DAMP5          | 2050 | 0              |
| DAMP6          | 2050 | 0              |
| DEnBW1         | 2050 | 0              |
| DEnBW2         | 2050 | 0              |
| Denmark_E      | 2050 | 20937.14       |
| Denmark_W      | 2050 | 103018.93      |
| DTPS0          | 2050 | 57648.16       |
| DTPS1          | 2050 | 0              |
| DTPS2          | 2050 | 0              |
| DTPS3          | 2050 | 0              |
| DTPS4          | 2050 | 0              |
| DTPS5          | 2050 | 0              |
| DTPS6          | 2050 | 0              |
| DVET0          | 2050 | 14343.22       |
| DVET1          | 2050 | 0              |
| DVET2          | 2050 | 0              |
| DVET3          | 2050 | 0              |
| DVET4          | 2050 | 0              |
| Finland        | 2050 | 97748.75       |
| France         | 2050 | 252036.7       |
| Ireland        | 2050 | 222688.87      |
| Italy          | 2050 | 165640.98      |
| Liechtenstein  | 2050 | 0              |
| Luxembourg     | 2050 | 0              |
| Netherlands    | 2050 | 91851.66       |
| Norway         | 2050 | 387828.81      |
| Poland         | 2050 | 49796.13       |
| Portugal       | 2050 | 37778.21       |
| Slovakia       | 2050 | 0              |
| Spain          | 2050 | 101755.97      |
| Sweden         | 2050 | 220970.25      |
| Switzerland    | 2050 | 0              |
| UK             | 2050 | 830014.1       |

Table S8.: Maximum installable capacity of photovoltaic [MW]

| Region         | Year | MaxInstallable |
|----------------|------|----------------|
| Austria        | 2020 | 11411.1        |
| Belgium        | 2020 | 19783.3        |
| Czech Republic | 2020 | 15503.57       |
| DAMP1          | 2020 | 1552.93        |
| DAMP2          | 2020 | 7028.99        |
| DAMP3          | 2020 | 4303.33        |
| DAMP4          | 2020 | 5563.17        |
| DAMP5          | 2020 | 6591.76        |
| DAMP6          | 2020 | 1953.05        |
| DEnBW1         | 2020 | 2612.88        |
| DEnBW2         | 2020 | 7352.5         |
| Denmark_E      | 2020 | 3746.77        |
| Denmark_W      | 2020 | 6018.86        |
| DTPS0          | 2020 | 0              |
| DTPS1          | 2020 | 3215.25        |
| DTPS2          | 2020 | 4443.87        |
| DTPS3          | 2020 | 6256.98        |
| DTPS4          | 2020 | 3854.5         |
| DTPS5          | 2020 | 5552.99        |
| DTPS6          | 2020 | 4805.93        |
| DVET0          | 2020 | 0              |
| DVET1          | 2020 | 10873.8        |
| DVET2          | 2020 | 1773.14        |
| DVET3          | 2020 | 7900.52        |
| DVET4          | 2020 | 7850.79        |
| Finland        | 2020 | 12335.32       |
| France         | 2020 | 88871.92       |
| Ireland        | 2020 | 4659.2         |
| Italy          | 2020 | 47728.95       |
| Liechtenstein  | 2020 | 62.69          |
| Luxembourg     | 2020 | 698.06         |
| Netherlands    | 2020 | 14345.41       |
| Norway         | 2020 | 3008.7         |
| Poland         | 2020 | 35372.88       |
| Portugal       | 2020 | 12744.79       |
| Slovakia       | 2020 | 8906.75        |
| Spain          | 2020 | 77702.93       |
| Sweden         | 2020 | 18005.82       |
| Switzerland    | 2020 | 2005.6         |
| UK             | 2020 | 58322.1        |
| Austria        | 2030 | 11411.1        |
| Belgium        | 2030 | 19783.3        |
| Czech Republic | 2030 | 15503.57       |
| DAMP1          | 2030 | 1552.93        |
| DAMP2          | 2030 | 7028.99        |
| DAMP3          | 2030 | 4303.33        |
| DAMP4          | 2030 | 5563.17        |
| DAMP5          | 2030 | 6591.76        |
| DAMP6          | 2030 | 1953.05        |
| DEnBW1         | 2030 | 2612.88        |
| DEnBW2         | 2030 | 7352.5         |
| Denmark_E      | 2030 | 3746.77        |
| Denmark_W      | 2030 | 6018.86        |
| DTPS0          | 2030 | 0              |
| DTPS1          | 2030 | 3215.25        |
| DTPS2          | 2030 | 4443.87        |
| DTPS3          | 2030 | 6256.98        |
| DTPS4          | 2030 | 3854.5         |
| DTPS5          | 2030 | 5552.99        |
| DTPS6          | 2030 | 4805.93        |
| DVET0          | 2030 | 0              |
| DVET1          | 2030 | 10873.8        |
| DVET2          | 2030 | 1773.14        |
| DVET3          | 2030 | 7900.52        |
| DVET4          | 2030 | 7850.79        |



Table S9.: Maximum installable capacity of photovoltaic (continued) [MW]

| Region         | Year | MaxInstallable |
|----------------|------|----------------|
| Finland        | 2030 | 12335.32       |
| France         | 2030 | 88871.92       |
| Ireland        | 2030 | 4659.2         |
| Italy          | 2030 | 47728.95       |
| Liechtenstein  | 2030 | 62.69          |
| Luxembourg     | 2030 | 698.06         |
| Netherlands    | 2030 | 14345.41       |
| Norway         | 2030 | 3008.7         |
| Poland         | 2030 | 35372.88       |
| Portugal       | 2030 | 12744.79       |
| Slovakia       | 2030 | 8906.75        |
| Spain          | 2030 | 77702.93       |
| Sweden         | 2030 | 18005.82       |
| Switzerland    | 2030 | 2005.6         |
| UK             | 2030 | 58322.1        |
| Austria        | 2050 | 11411.1        |
| Belgium        | 2050 | 19783.3        |
| Czech Republic | 2050 | 15503.57       |
| DAMP1          | 2050 | 1552.93        |
| DAMP2          | 2050 | 7028.99        |
| DAMP3          | 2050 | 4303.33        |
| DAMP4          | 2050 | 5563.17        |
| DAMP5          | 2050 | 6591.76        |
| DAMP6          | 2050 | 1953.05        |
| DEnBW1         | 2050 | 2612.88        |
| DEnBW2         | 2050 | 7352.5         |
| Denmark_E      | 2050 | 3746.77        |
| Denmark_W      | 2050 | 6018.86        |
| DTPS0          | 2050 | 0              |
| DTPS1          | 2050 | 3215.25        |
| DTPS2          | 2050 | 4443.87        |
| DTPS3          | 2050 | 6256.98        |
| DTPS4          | 2050 | 3854.5         |
| DTPS5          | 2050 | 5552.99        |
| DTPS6          | 2050 | 4805.93        |
| DVET0          | 2050 | 0              |
| DVET1          | 2050 | 10873.8        |
| DVET2          | 2050 | 1773.14        |
| DVET3          | 2050 | 7900.52        |
| DVET4          | 2050 | 7850.79        |
| Finland        | 2050 | 12335.32       |
| France         | 2050 | 88871.92       |
| Ireland        | 2050 | 4659.2         |
| Italy          | 2050 | 47728.95       |
| Liechtenstein  | 2050 | 62.69          |
| Luxembourg     | 2050 | 698.06         |
| Netherlands    | 2050 | 14345.41       |
| Norway         | 2050 | 3008.7         |
| Poland         | 2050 | 35372.88       |
| Portugal       | 2050 | 12744.79       |
| Slovakia       | 2050 | 8906.75        |
| Spain          | 2050 | 77702.93       |
| Sweden         | 2050 | 18005.82       |
| Switzerland    | 2050 | 2005.6         |
| UK             | 2050 | 58322.1        |

Table S10.: Maximum installable capacity of Run-of-river [MW]

| Region         | Year | MaxInstallable |
|----------------|------|----------------|
| Austria        | 2020 | 14281.07       |
| Belgium        | 2020 | 140            |
| Czech Republic | 2020 | 979.15         |
| DAMP1          | 2020 | 159.94         |
| DAMP2          | 2020 | 1132.66        |
| DAMP3          | 2020 | 92.25          |
| DAMP4          | 2020 | 154.14         |
| DAMP5          | 2020 | 543.57         |
| DAMP6          | 2020 | 379.96         |
| DEnBW1         | 2020 | 50.28          |
| DEnBW2         | 2020 | 1384.54        |
| Denmark_E      | 2020 | 0.48           |
| Denmark_W      | 2020 | 10.64          |
| DTPS0          | 2020 | 0              |
| DTPS1          | 2020 | 138.96         |
| DTPS2          | 2020 | 138.17         |
| DTPS3          | 2020 | 276.73         |
| DTPS4          | 2020 | 66.41          |
| DTPS5          | 2020 | 648.11         |
| DTPS6          | 2020 | 1118.94        |
| DVET0          | 2020 | 0              |
| DVET1          | 2020 | 324.64         |
| DVET2          | 2020 | 0.64           |
| DVET3          | 2020 | 85.12          |
| DVET4          | 2020 | 76.41          |
| Finland        | 2020 | 4058.46        |
| France         | 2020 | 23816.38       |
| Ireland        | 2020 | 166.03         |
| Italy          | 2020 | 38082.12       |
| Liechtenstein  | 2020 | 0.35           |
| Luxembourg     | 2020 | 44             |
| Netherlands    | 2020 | 68             |
| Norway         | 2020 | 34813.51       |
| Poland         | 2020 | 4593.45        |
| Portugal       | 2020 | 9714.26        |
| Slovakia       | 2020 | 2809.84        |
| Spain          | 2020 | 32143.05       |
| Sweden         | 2020 | 20363.56       |
| Switzerland    | 2020 | 7084.61        |
| UK             | 2020 | 4895           |
| Austria        | 2030 | 14281.07       |
| Belgium        | 2030 | 140            |
| Czech Republic | 2030 | 979.15         |
| DAMP1          | 2030 | 159.94         |
| DAMP2          | 2030 | 1132.66        |
| DAMP3          | 2030 | 92.25          |
| DAMP4          | 2030 | 154.14         |
| DAMP5          | 2030 | 543.57         |
| DAMP6          | 2030 | 379.96         |
| DEnBW1         | 2030 | 50.28          |
| DEnBW2         | 2030 | 1384.54        |
| Denmark_E      | 2030 | 0.48           |
| Denmark_W      | 2030 | 10.64          |
| DTPS0          | 2030 | 0              |
| DTPS1          | 2030 | 138.96         |
| DTPS2          | 2030 | 138.17         |
| DTPS3          | 2030 | 276.73         |
| DTPS4          | 2030 | 66.41          |
| DTPS5          | 2030 | 648.11         |
| DTPS6          | 2030 | 1118.94        |
| DVET0          | 2030 | 0              |
| DVET1          | 2030 | 324.64         |
| DVET2          | 2030 | 0.64           |
| DVET3          | 2030 | 85.12          |
| DVET4          | 2030 | 76.41          |

Table S11.: Maximum installable capacity of Run-of-river (continued) [MW]

| Region         | Year | MaxInstallable |
|----------------|------|----------------|
| Finland        | 2030 | 4058.46        |
| France         | 2030 | 23816.38       |
| Ireland        | 2030 | 166.03         |
| Italy          | 2030 | 38082.12       |
| Liechtenstein  | 2030 | 0.35           |
| Luxembourg     | 2030 | 44             |
| Netherlands    | 2030 | 68             |
| Norway         | 2030 | 34813.51       |
| Poland         | 2030 | 4593.45        |
| Portugal       | 2030 | 9714.26        |
| Slovakia       | 2030 | 2809.84        |
| Spain          | 2030 | 32143.05       |
| Sweden         | 2030 | 20363.56       |
| Switzerland    | 2030 | 7084.61        |
| UK             | 2030 | 4895           |
| Austria        | 2050 | 14281.07       |
| Belgium        | 2050 | 140            |
| Czech Republic | 2050 | 979.15         |
| DAMP1          | 2050 | 159.94         |
| DAMP2          | 2050 | 1132.66        |
| DAMP3          | 2050 | 92.25          |
| DAMP4          | 2050 | 154.14         |
| DAMP5          | 2050 | 543.57         |
| DAMP6          | 2050 | 379.96         |
| DEnBW1         | 2050 | 50.28          |
| DEnBW2         | 2050 | 1384.54        |
| Denmark_E      | 2050 | 0.48           |
| Denmark_W      | 2050 | 10.64          |
| DTPS0          | 2050 | 0              |
| DTPS1          | 2050 | 138.96         |
| DTPS2          | 2050 | 138.17         |
| DTPS3          | 2050 | 276.73         |
| DTPS4          | 2050 | 66.41          |
| DTPS5          | 2050 | 648.11         |
| DTPS6          | 2050 | 1118.94        |
| DVET0          | 2050 | 0              |
| DVET1          | 2050 | 324.64         |
| DVET2          | 2050 | 0.64           |
| DVET3          | 2050 | 85.12          |
| DVET4          | 2050 | 76.41          |
| Finland        | 2050 | 4058.46        |
| France         | 2050 | 23816.38       |
| Ireland        | 2050 | 166.03         |
| Italy          | 2050 | 38082.12       |
| Liechtenstein  | 2050 | 0.35           |
| Luxembourg     | 2050 | 44             |
| Netherlands    | 2050 | 68             |
| Norway         | 2050 | 34813.51       |
| Poland         | 2050 | 4593.45        |
| Portugal       | 2050 | 9714.26        |
| Slovakia       | 2050 | 2809.84        |
| Spain          | 2050 | 32143.05       |
| Sweden         | 2050 | 20363.56       |
| Switzerland    | 2050 | 7084.61        |
| UK             | 2050 | 4895           |

Table S12.: Maximum installable capacity of onshore wind [MW]

| Region         | Year | MaxInstallable |
|----------------|------|----------------|
| Austria        | 2020 | 14918.52       |
| Belgium        | 2020 | 3173.21        |
| CZECH REPUBLIC | 2020 | 13827.47       |
| DAMP1          | 2020 | 1381.81        |
| DAMP2          | 2020 | 811.97         |
| DAMP3          | 2020 | 1467.16        |
| DAMP4          | 2020 | 1428.29        |
| DAMP5          | 2020 | 2793.67        |
| DAMP6          | 2020 | 1664.52        |
| DEnBW1         | 2020 | 1150.05        |
| DEnBW2         | 2020 | 5881.02        |
| Denmark_E      | 2020 | 1437.52        |
| Denmark_W      | 2020 | 6381.29        |
| DTPS0          | 2020 | 0              |
| DTPS1          | 2020 | 2485.56        |
| DTPS2          | 2020 | 2943.34        |
| DTPS3          | 2020 | 4263.53        |
| DTPS4          | 2020 | 2503.54        |
| DTPS5          | 2020 | 3820.35        |
| DTPS6          | 2020 | 4646.14        |
| DVET0          | 2020 | 0              |
| DVET1          | 2020 | 8547.27        |
| DVET2          | 2020 | 165.8          |
| DVET3          | 2020 | 5077.54        |
| DVET4          | 2020 | 4386.77        |
| Finland        | 2020 | 70300.8        |
| France         | 2020 | 110017.05      |
| Ireland        | 2020 | 13348.48       |
| Italy          | 2020 | 62138.07       |
| Liechtenstein  | 2020 | 20.79          |
| Luxembourg     | 2020 | 342.88         |
| Netherlands    | 2020 | 5321.4         |
| Norway         | 2020 | 72966.56       |
| Poland         | 2020 | 58838.95       |
| Portugal       | 2020 | 21747.86       |
| Slovakia       | 2020 | 8226.62        |
| Spain          | 2020 | 130898.31      |
| Sweden         | 2020 | 89858.62       |
| Switzerland    | 2020 | 7078.99        |
| UK             | 2020 | 37062.63       |
| Austria        | 2030 | 14918.52       |
| Belgium        | 2030 | 3173.21        |
| Czech Republic | 2030 | 13827.47       |
| DAMP1          | 2030 | 1381.81        |
| DAMP2          | 2030 | 811.97         |
| DAMP3          | 2030 | 1467.16        |
| DAMP4          | 2030 | 1428.29        |
| DAMP5          | 2030 | 2793.67        |
| DAMP6          | 2030 | 1664.52        |
| DEnBW1         | 2030 | 1150.05        |
| DEnBW2         | 2030 | 5881.02        |
| Denmark_E      | 2030 | 1437.52        |
| Denmark_W      | 2030 | 6381.29        |
| DTPS0          | 2030 | 0              |
| DTPS1          | 2030 | 2485.56        |
| DTPS2          | 2030 | 2943.34        |
| DTPS3          | 2030 | 4263.53        |
| DTPS4          | 2030 | 2503.54        |
| DTPS5          | 2030 | 3820.35        |
| DTPS6          | 2030 | 4646.14        |
| DVET0          | 2030 | 0              |
| DVET1          | 2030 | 8547.27        |
| DVET2          | 2030 | 165.8          |
| DVET3          | 2030 | 5077.54        |
| DVET4          | 2030 | 4386.77        |

Table S13.: Maximum installable capacity of onshore wind (continued) [MW]

| Region         | Year | MaxInstallable |
|----------------|------|----------------|
| Finland        | 2030 | 70300.8        |
| France         | 2030 | 110017.05      |
| Ireland        | 2030 | 13348.48       |
| Italy          | 2030 | 62138.07       |
| Liechtenstein  | 2030 | 20.79          |
| Luxembourg     | 2030 | 342.88         |
| Netherlands    | 2030 | 5321.4         |
| Norway         | 2030 | 72966.56       |
| Poland         | 2030 | 58838.95       |
| Portugal       | 2030 | 21747.86       |
| Slovakia       | 2030 | 8226.62        |
| Spain          | 2030 | 130898.31      |
| Sweden         | 2030 | 89858.62       |
| Switzerland    | 2030 | 7078.99        |
| UK             | 2030 | 37062.63       |
| Austria        | 2050 | 14918.52       |
| Belgium        | 2050 | 3173.21        |
| CZECH REPUBLIC | 2050 | 13827.47       |
| DAMP1          | 2050 | 1381.81        |
| DAMP2          | 2050 | 811.97         |
| DAMP3          | 2050 | 1467.16        |
| DAMP4          | 2050 | 1428.29        |
| DAMP5          | 2050 | 2793.67        |
| DAMP6          | 2050 | 1664.52        |
| DEnBW1         | 2050 | 1150.05        |
| DEnBW2         | 2050 | 5881.02        |
| Denmark_E      | 2050 | 1437.52        |
| Denmark_W      | 2050 | 6381.29        |
| DTPS0          | 2050 | 0              |
| DTPS1          | 2050 | 2485.56        |
| DTPS2          | 2050 | 2943.34        |
| DTPS3          | 2050 | 4263.53        |
| DTPS4          | 2050 | 2503.54        |
| DTPS5          | 2050 | 3820.35        |
| DTPS6          | 2050 | 4646.14        |
| DVET0          | 2050 | 0              |
| DVET1          | 2050 | 8547.27        |
| DVET2          | 2050 | 165.8          |
| DVET3          | 2050 | 5077.54        |
| DVET4          | 2050 | 4386.77        |
| Finland        | 2050 | 70300.8        |
| France         | 2050 | 110017.05      |
| Ireland        | 2050 | 13348.48       |
| Italy          | 2050 | 62138.07       |
| Liechtenstein  | 2050 | 20.79          |
| Luxembourg     | 2050 | 342.88         |
| Netherlands    | 2050 | 5321.4         |
| Norway         | 2050 | 72966.56       |
| Poland         | 2050 | 58838.95       |
| Portugal       | 2050 | 21747.86       |
| Slovakia       | 2050 | 8226.62        |
| Spain          | 2050 | 130898.31      |
| Sweden         | 2050 | 89858.62       |
| Switzerland    | 2050 | 7078.99        |
| UK             | 2050 | 37062.63       |

Table S14.: Maximum installable capacity of CSP [MW]

| <b>Region</b> | <b>MaxInstallable</b> |
|---------------|-----------------------|
| Austria       | 0                     |
| Belgium       | 0                     |
| CzechRep      | 0                     |
| DAMP1         | 0                     |
| DAMP2         | 0                     |
| DAMP3         | 0                     |
| DAMP4         | 0                     |
| DAMP5         | 0                     |
| DAMP6         | 0                     |
| DEnBW1        | 0                     |
| DEnBW2        | 0                     |
| DTPS0         | 0                     |
| DTPS1         | 0                     |
| DTPS2         | 0                     |
| DTPS3         | 0                     |
| DTPS4         | 0                     |
| DTPS5         | 0                     |
| DTPS6         | 0                     |
| DVET0         | 0                     |
| DVET1         | 0                     |
| DVET2         | 0                     |
| DVET3         | 0                     |
| DVET4         | 0                     |
| Denmark_E     | 0                     |
| Denmark_W     | 0                     |
| Finland       | 0                     |
| France        | 18636                 |
| Ireland       | 0                     |
| Italy         | 103164                |
| Liechtenstein | 0                     |
| Luxemburg     | 0                     |
| Netherlands   | 0                     |
| Norway        | 0                     |
| Poland        | 0                     |
| Portugal      | 324299                |
| Slovakia      | 0                     |
| Spain         | 1241499               |
| Sweden        | 0                     |
| Switzerland   | 0                     |
| UK            | 0                     |

Table S15.: Maximum installable capacity of Hydrogen storage [MW]

| Region         | Year | MaxInstallableConverter | MaxInstallableStorage |
|----------------|------|-------------------------|-----------------------|
| Austria        | 2020 | 99999999                | 99999999              |
| Belgium        | 2020 | 99999999                | 99999999              |
| Czech Republic | 2020 | 99999999                | 99999999              |
| DAMP1          | 2020 | 99999999                | 99999999              |
| DAMP2          | 2020 | 99999999                | 99999999              |
| DAMP3          | 2020 | 99999999                | 99999999              |
| DAMP4          | 2020 | 99999999                | 99999999              |
| DAMP5          | 2020 | 99999999                | 99999999              |
| DAMP6          | 2020 | 99999999                | 99999999              |
| DEnBW1         | 2020 | 99999999                | 99999999              |
| DEnBW2         | 2020 | 99999999                | 99999999              |
| Denmark_E      | 2020 | 99999999                | 99999999              |
| Denmark_W      | 2020 | 99999999                | 99999999              |
| DTPS0          | 2020 | 99999999                | 99999999              |
| DTPS1          | 2020 | 99999999                | 99999999              |
| DTPS2          | 2020 | 99999999                | 99999999              |
| DTPS3          | 2020 | 99999999                | 99999999              |
| DTPS4          | 2020 | 99999999                | 99999999              |
| DTPS5          | 2020 | 99999999                | 99999999              |
| DTPS6          | 2020 | 99999999                | 99999999              |
| DVET0          | 2020 | 99999999                | 99999999              |
| DVET1          | 2020 | 99999999                | 99999999              |
| DVET2          | 2020 | 99999999                | 99999999              |
| DVET3          | 2020 | 99999999                | 99999999              |
| DVET4          | 2020 | 99999999                | 99999999              |
| Finland        | 2020 | 99999999                | 99999999              |
| France         | 2020 | 99999999                | 99999999              |
| Ireland        | 2020 | 99999999                | 99999999              |
| Italy          | 2020 | 99999999                | 99999999              |
| Liechtenstein  | 2020 | 99999999                | 99999999              |
| Luxemburg      | 2020 | 99999999                | 99999999              |
| Netherlands    | 2020 | 99999999                | 99999999              |
| Norway         | 2020 | 99999999                | 99999999              |
| Poland         | 2020 | 99999999                | 99999999              |
| Portugal       | 2020 | 99999999                | 99999999              |
| Slovakia       | 2020 | 99999999                | 99999999              |
| Spain          | 2020 | 99999999                | 99999999              |
| Sweden         | 2020 | 99999999                | 99999999              |
| Switzerland    | 2020 | 99999999                | 99999999              |
| UK             | 2020 | 99999999                | 99999999              |
| Austria        | 2030 | 99999999                | 9591000               |
| Belgium        | 2030 | 99999999                | 0                     |
| Czech Republic | 2030 | 99999999                | 0                     |
| DAMP1          | 2030 | 99999999                | 0                     |
| DAMP2          | 2030 | 99999999                | 1313012.408           |
| DAMP3          | 2030 | 99999999                | 0                     |
| DAMP4          | 2030 | 99999999                | 0                     |
| DAMP5          | 2030 | 99999999                | 0                     |
| DAMP6          | 2030 | 99999999                | 0                     |
| DEnBW1         | 2030 | 99999999                | 0                     |
| DEnBW2         | 2030 | 99999999                | 0                     |
| Denmark_E      | 2030 | 99999999                | 0                     |
| Denmark_W      | 2030 | 99999999                | 17972700              |
| DTPS0          | 2030 | 99999999                | 0                     |
| DTPS1          | 2030 | 99999999                | 383257.6759           |
| DTPS2          | 2030 | 99999999                | 75444983.24           |
| DTPS3          | 2030 | 99999999                | 3193813.966           |
| DTPS4          | 2030 | 99999999                | 780710.0805           |
| DTPS5          | 2030 | 99999999                | 0                     |
| DTPS6          | 2030 | 99999999                | 0                     |
| DVET0          | 2030 | 99999999                | 0                     |
| DVET1          | 2030 | 99999999                | 18808015.58           |
| DVET2          | 2030 | 99999999                | 0                     |
| DVET3          | 2030 | 99999999                | 19908107.05           |
| DVET4          | 2030 | 99999999                | 0                     |

Table S16.: Maximum installable capacity of Hydrogen storage (continued) [MW]

| Region         | Year | MaxInstallableConverter | MaxInstallableStorage |
|----------------|------|-------------------------|-----------------------|
| Finland        | 2030 | 99999999                | 0                     |
| France         | 2030 | 99999999                | 59909000              |
| Ireland        | 2030 | 99999999                | 9591000               |
| Italy          | 2030 | 99999999                | 11981800              |
| Liechtenstein  | 2030 | 99999999                | 0                     |
| Luxemburg      | 2030 | 99999999                | 0                     |
| Netherlands    | 2030 | 99999999                | 29954500              |
| Norway         | 2030 | 99999999                | 0                     |
| Poland         | 2030 | 99999999                | 149786400             |
| Portugal       | 2030 | 99999999                | 14372600              |
| Slovakia       | 2030 | 99999999                | 5990900               |
| Spain          | 2030 | 99999999                | 119831900             |
| Sweden         | 2030 | 99999999                | 0                     |
| Switzerland    | 2030 | 99999999                | 3600100               |
| UK             | 2030 | 99999999                | 35945400              |
| Austria        | 2050 | 99999999                | 9591000               |
| Belgium        | 2050 | 99999999                | 0                     |
| Czech Republic | 2050 | 99999999                | 0                     |
| DAMP1          | 2050 | 99999999                | 0                     |
| DAMP2          | 2050 | 99999999                | 1313012.408           |
| DAMP3          | 2050 | 99999999                | 0                     |
| DAMP4          | 2050 | 99999999                | 0                     |
| DAMP5          | 2050 | 99999999                | 0                     |
| DAMP6          | 2050 | 99999999                | 0                     |
| DEnBW1         | 2050 | 99999999                | 0                     |
| DEnBW2         | 2050 | 99999999                | 0                     |
| Denmark_E      | 2050 | 99999999                | 0                     |
| Denmark_W      | 2050 | 99999999                | 17972700              |
| DTPS0          | 2050 | 99999999                | 0                     |
| DTPS1          | 2050 | 99999999                | 383257.6759           |
| DTPS2          | 2050 | 99999999                | 75444983.24           |
| DTPS3          | 2050 | 99999999                | 3193813.966           |
| DTPS4          | 2050 | 99999999                | 780710.0805           |
| DTPS5          | 2050 | 99999999                | 0                     |
| DTPS6          | 2050 | 99999999                | 0                     |
| DVET0          | 2050 | 99999999                | 0                     |
| DVET1          | 2050 | 99999999                | 18808015.58           |
| DVET2          | 2050 | 99999999                | 0                     |
| DVET3          | 2050 | 99999999                | 19908107.05           |
| DVET4          | 2050 | 99999999                | 0                     |
| Finland        | 2050 | 99999999                | 0                     |
| France         | 2050 | 99999999                | 59909000              |
| Ireland        | 2050 | 99999999                | 9591000               |
| Italy          | 2050 | 99999999                | 11981800              |
| Luxemburg      | 2050 | 99999999                | 0                     |
| Liechtenstein  | 2050 | 99999999                | 29954500              |
| Netherlands    | 2050 | 99999999                | 29954500              |
| Norway         | 2050 | 99999999                | 0                     |
| Poland         | 2050 | 99999999                | 149786400             |
| Portugal       | 2050 | 99999999                | 14372600              |
| Slovakia       | 2050 | 99999999                | 5990900               |
| Spain          | 2050 | 99999999                | 119831900             |
| Sweden         | 2050 | 99999999                | 0                     |
| Switzerland    | 2050 | 99999999                | 3600100               |
| UK             | 2050 | 99999999                | 35945400              |



## D Technical Parameters

To allow for comparison of literature values, all cost values found in literature were transformed into €<sub>2014</sub> under consideration of the yearly averaged US-Dolar to Euro change rate and by assuming a yearly inflation rate of 1,8%.

The parameters are used under the following definitions:

**Lifetime:** The technological lifetime of the main components.

**Availability:** Percentage of available capacity in time, if just considering power plant operation limitations, due to e.g. maintenance or reparation work.

**Capacity Credit:** "By considering an extended time period [...] it is possible to evaluate how much capacity is replaced by variable renewables by looking at the difference between the peak demand and the peak residual demand. [...] The capacity credit is the peak demand less the peak residual demand, expressed as a percentage of the variable renewables installed." [IEA2011].

**Storage characteristics:** A differentiation between storage and converter technology is done for lifetime and amortisation time definitions. These correspond to the first and second number in S17, respectively. In case of Li-Ion Batteries the same life and amortisation time are assumed but a learning curve is included with values given for 2020, 2030 and 2050. This values can also be found in Table S28

Table S17.: Lifetime [Years]

| [NPS <sup>+</sup> 12] Database |              |    |    |    |    |    |    |     |    |    |    |    | [HHM11] |          | [Hun15]  | [Unt14] | [MW12] | [Pal13] | Final |  |
|--------------------------------|--------------|----|----|----|----|----|----|-----|----|----|----|----|---------|----------|----------|---------|--------|---------|-------|--|
| 2020                           |              |    |    |    |    |    |    |     |    |    |    |    | 2030    |          |          |         |        |         |       |  |
| Conventional Power Plants      | CCGT         | 25 | 30 | 30 | 30 | 30 | 30 | 30  | 30 | 30 | 30 | 30 | 30      | 30       | 30       |         |        |         |       |  |
|                                | GT_NGAS      | 25 | 30 | 30 | 30 | 30 | 30 | 30  | 30 | 20 | 30 | 30 | 30      | 30       | 30       |         |        |         |       |  |
|                                | IC           | 25 | 20 | 30 | 30 | 30 | -  | -   | -  | -  | -  | -  | -       | 30       | 30       |         |        |         |       |  |
|                                | ST_Coal      | 25 | 40 | 40 | 40 | 40 | 40 | 40  | 40 | 40 | 50 | 50 | 30      | 30       | 40       |         |        |         |       |  |
|                                | ST_Lignite   | 25 | 40 | 40 | 40 | 40 | 40 | 40  | 40 | 40 | 50 | 50 | 30      | 30       | 40       |         |        |         |       |  |
| Controllable RE                | ST_Nuclear   | 25 | 60 | 45 | 45 | 45 | 60 | 50  | 60 | 30 | 30 | 50 | 50      | 30       | 50       |         |        |         |       |  |
|                                | Biomass      | 25 | 20 | 30 | 30 | 30 | -  | -   | -  | -  | -  | -  | -       | 25       | 25       |         |        |         |       |  |
|                                | CSP          | -  | 25 | 30 | 30 | 30 | -  | -   | -  | -  | -  | -  | -       | 25       | 25       |         |        |         |       |  |
|                                | HydroRes     | 60 | -  | 50 | 50 | 50 | -  | 100 | -  | -  | -  | -  | -       | 60       | 60       |         |        |         |       |  |
|                                | RunOfRiver   | 60 | -  | -  | -  | -  | -  | -   | -  | -  | -  | -  | -       | 60       | 60       |         |        |         |       |  |
| Fluctuating RE                 | PV           | 20 | 25 | 25 | 25 | 25 | -  | -   | -  | -  | -  | -  | 25      | 25       | 25       |         |        |         |       |  |
|                                | WindOff      | 18 | 20 | 25 | 25 | 25 | -  | -   | -  | -  | -  | -  | 20      | 20       | 23       |         |        |         |       |  |
|                                | WindOn       | 18 | 20 | 25 | 25 | 25 | -  | -   | -  | -  | -  | -  | 20      | 20       | 23       |         |        |         |       |  |
|                                | HydroStorage | 30 | -  | -  | -  | -  | -  | -   | -  | -  | -  | -  | -       | 30/15    | 30/15    |         |        |         |       |  |
| Storage                        | LlonBattery  | 15 | -  | -  | -  | -  | -  | -   | -  | -  | -  | -  | -       | 21,22,25 | 21,22,25 |         |        |         |       |  |
|                                | Pstorage     | 60 | 60 | -  | -  | -  | -  | 100 | -  | -  | -  | -  | -       | 60/30    | 60/30    |         |        |         |       |  |

Table S18.: Amortisation Time [years]

|                                          |                     | <b>Final</b> |
|------------------------------------------|---------------------|--------------|
| <b>Conventional<br/>Power<br/>Plants</b> | <b>CCGT</b>         | 25           |
|                                          | <b>GT_NGAS</b>      | 25           |
|                                          | <b>IC</b>           | 25           |
|                                          | <b>ST_Coal</b>      | 25           |
|                                          | <b>ST_Lignite</b>   | 25           |
|                                          | <b>ST_Nuclear</b>   | 25           |
| <b>Controllable<br/>RE</b>               | <b>Biomass</b>      | 25           |
|                                          | <b>CSP</b>          | 25           |
|                                          | <b>HydroRes</b>     | 25           |
| <b>Fluctuating<br/>RE</b>                | <b>RunOfRiver</b>   | 25           |
|                                          | <b>PV</b>           | 20           |
|                                          | <b>WindOff</b>      | 20           |
|                                          | <b>WindOn</b>       | 20           |
| <b>Storage</b>                           | <b>HydroStorage</b> | 30/15        |
|                                          | <b>LilonBattery</b> | 21, 22, 25   |
|                                          | <b>Pstorage</b>     | 25/25        |

Table S19.: Availability [%]

|                           | [NPS <sup>+</sup> 12] | DLR<br>Database | [Unt14] | [SW07] | [Pal13] | [BPG <sup>+</sup> 15] | Final |      |
|---------------------------|-----------------------|-----------------|---------|--------|---------|-----------------------|-------|------|
| Conventional Power Plants | CCGT                  | 96              | 97.7    | 84.5   | -       | 100                   | -     | 96   |
|                           | GT_NGAS               | 94.8            | 97.7    | 84.5   | -       | 95                    | -     | 94.8 |
|                           | IC                    | 94.8            | 97.7    | -      | -       | -                     | -     | 94.8 |
|                           | ST_Coal               | 89.6            | 93.5    | 83.75  | -       | 93                    | 94    | 90   |
|                           | ST_Lignite            | 90.2            | 94      | 86.25  | -       | 93                    | 93.5  | 91   |
|                           | ST_Nuclear            | 90              | 94.5    | 84.5   | -       | 96                    | 94.5  | 94   |
| Controllable RE           | Biomass               | 95              | 88      | -      | -       | -                     | -     | 91   |
|                           | CSP                   | -               | 88      | -      | -       | -                     | -     | 90   |
|                           | HydroRes              | 98              | -       | 90.75  | -       | -                     | -     | 90   |
| Fluctuating RE            | RunOffRiver           | -               | -       | -      | -       | -                     | -     | -    |
|                           | PV                    | -               | -       | -      | -       | -                     | -     | -    |
|                           | WindOff               | -               | -       | -      | -       | -                     | -     | -    |
|                           | WindOn                | -               | -       | -      | -       | -                     | -     | -    |
| Storage                   | HydroStorage          | 95              | -       | -      | 70      | -                     | -     | 95   |
|                           | LilonBattery          | 98              | -       | -      | -       | -                     | -     | 98   |
|                           | Pstorage              | 98              | 90      | 95.25  | 70      | -                     | -     | 90   |

Table S20.: Capacity Credit [%]

|                                  |                     | [Pal13] |      | [BPG <sup>+</sup> 15] | [Str14] | Final        |
|----------------------------------|---------------------|---------|------|-----------------------|---------|--------------|
| <b>Conventional Power Plants</b> | <b>CCGT</b>         | 100     | 97.7 | 97.7                  | 90      | Availability |
|                                  | <b>GT_NGAS</b>      | 0.95    | 97.7 | 97.7                  | 90      | Availability |
|                                  | <b>IC</b>           | -       | -    | -                     | -       | Availability |
|                                  | <b>ST_Coal</b>      | 0.93    | 94   | 94                    | 90      | Availability |
|                                  | <b>ST_Lignite</b>   | 0.93    | 93.5 | 93.5                  | 90      | Availability |
|                                  | <b>ST_Nuclear</b>   | 0.96    | 94.5 | 94.5                  | 90      | Availability |
| <b>Controllable RE</b>           | <b>Biomass</b>      | -       | 88   | 65                    | 80      | 65           |
|                                  | <b>CSP</b>          | -       | -    | -                     | 90      | 90           |
|                                  | <b>HydroRes</b>     | -       | -    | -                     | 80      | 80           |
| <b>Fluctuating RE</b>            | <b>RunOfRiver</b>   | -       | 40   | 25                    | 25-47   | 30           |
|                                  | <b>PV</b>           | 0.6     | 0    | 0                     | 0       | 0            |
|                                  | <b>WindOff</b>      | 0.105   | 8    | 1                     | -       | 6            |
|                                  | <b>WindOn</b>       | 0.105   | 6    | 1                     | -       | 4            |
| <b>Storage</b>                   | <b>HydroStorage</b> | -       | -    | -                     | 0       | 80           |
|                                  | <b>LilonBattery</b> | -       | -    | -                     | 0       | 80           |
|                                  | <b>Pstorage</b>     | -       | 80   | 80                    | 0       | 80           |

Table S21.: Investment Costs 1 [€<sub>2014</sub>/kW]

|                                  |                     | [NPS <sup>+</sup> 12] |         |         | [HHM11] |         |
|----------------------------------|---------------------|-----------------------|---------|---------|---------|---------|
|                                  |                     | 2020                  | 2030    | 2050    | 2020    | 2030    |
| <b>Conventional Power Plants</b> | <b>CCGT</b>         | 765.31                | -       | -       | 1540.07 | 1199.62 |
|                                  | <b>GT_NGAS</b>      | 437.32                | -       | -       | 770.03  | 735.67  |
|                                  | <b>IC</b>           | 437.32                | -       | -       | 821.59  | 785.07  |
|                                  | <b>ST_Coal</b>      | 1421.29               | -       | -       | 1540.07 | 1472.41 |
|                                  | <b>ST_Lignite</b>   | 1639.95               | -       | -       | 1540.07 | 1472.41 |
|                                  | <b>ST_Nuclear</b>   | 5466.49               | -       | -       | 3522.61 | 3476.43 |
| <b>Controllable RE</b>           | <b>Biomass</b>      | 2733.25               | -       | -       | 211.57  | 1913.81 |
|                                  | <b>CSP</b>          | 1636.67               | 1461.74 | 1364.44 | 4081.08 | 3508.65 |
|                                  | <b>HydroRes</b>     | 1606.06               | 1647.60 | 1711.01 | 2025.50 | 1953.55 |
| <b>Fluctuating RE</b>            | <b>RunOfRiver</b>   | 5280.63               | 5356.07 | 5499.29 | -       | -       |
|                                  | <b>PV</b>           | 1314.15               | 1086.74 | 987.25  | 1895.55 | 1440.19 |
|                                  | <b>WindOff</b>      | 2295.93               | 1967.94 | 1421.29 | 2887.90 | 2620.48 |
|                                  | <b>WindOn</b>       | 1126.10               | 1071.43 | 983.97  | 1141.63 | 1089.00 |
| <b>Storage</b>                   | <b>HydroStorage</b> | 1804.16               | 1705.76 | 1640.17 | -       | -       |
|                                  | <b>LilonBattery</b> | 437.32                | 300.66  | 218.66  | -       | -       |
|                                  | <b>Pstorage</b>     | 710.64                | 710.64  | 710.64  | -       | -       |

Table S22.: Investment Costs 2 [€<sub>2014</sub>/kW]

|                                  |                     | [Hun15] |         |                 |         | [Pal13] |
|----------------------------------|---------------------|---------|---------|-----------------|---------|---------|
|                                  |                     |         | 2020    | [Unt14]<br>2030 | 2050    |         |
| <b>Conventional Power Plants</b> | <b>CCGT</b>         | 845.40  | 859.17  | 859.17          | 859.17  | 799.49  |
|                                  | <b>GT_NGAS</b>      | 400.39  | 429.59  | 429.59          | 429.59  | 530.07  |
|                                  | <b>IC</b>           | -       | -       | -               | -       | -       |
|                                  | <b>ST_Coal</b>      | 1578.08 | 1610.95 | 1610.95         | 1610.95 | 2266.94 |
|                                  | <b>ST_Lignite</b>   | 1803.52 | 2094.24 | 2094.24         | 2094.24 | 2266.94 |
|                                  | <b>ST_Nuclear</b>   | 3382.78 | 3390.52 | 3390.52         | 3390.52 | 4252.50 |
| <b>Controllable RE</b>           | <b>Biomass</b>      | -       | -       | -               | -       | -       |
|                                  | <b>CSP</b>          | -       | -       | -               | -       | -       |
|                                  | <b>HydroRes</b>     | -       | -       | -               | -       | -       |
| <b>Fluctuating RE</b>            | <b>RunOfRiver</b>   | -       | -       | -               | -       | -       |
|                                  | <b>PV</b>           | -       | -       | -               | -       | 3790.18 |
|                                  | <b>WindOff</b>      | -       | -       | -               | -       | 4762.64 |
|                                  | <b>WindOn</b>       | -       | -       | -               | -       | 1943.32 |
| <b>Storage</b>                   | <b>HydroStorage</b> | -       | -       | -               | -       | -       |
|                                  | <b>LilonBattery</b> | -       | -       | -               | -       | -       |
|                                  | <b>Pstorage</b>     | -       | -       | -               | -       | -       |

Table S23.: Investment Costs 3 [€<sub>2014</sub>/kW]

|                                  |                     | [BPG <sup>+</sup> 15] | Final   |         |         |
|----------------------------------|---------------------|-----------------------|---------|---------|---------|
|                                  |                     |                       | 2020    | 2030    | 2050    |
| <b>Conventional Power Plants</b> | <b>CCGT</b>         | 765.31                | 850.00  | 850.00  | 850.00  |
|                                  | <b>GT_NGAS</b>      | 355.32                | 437.32  | 437.32  | 437.32  |
|                                  | <b>IC</b>           | -                     | 821.59  | 785.07  | 750.00  |
|                                  | <b>ST_Coal</b>      | 1847.68               | 1500.00 | 1500.00 | 1500.00 |
|                                  | <b>ST_Lignite</b>   | 1639.95               | 1639.95 | 1639.95 | 1639.95 |
|                                  | <b>ST_Nuclear</b>   | 5466.49               | 5000.00 | 5000.00 | 5000.00 |
| <b>Controllable RE</b>           | <b>Biomass</b>      | -                     | 2733.25 | 2733.25 | 2733.25 |
|                                  | <b>CSP</b>          | -                     | 1636.67 | 1461.74 | 1364.44 |
|                                  | <b>HydroRes</b>     | -                     | 1606.06 | 1647.60 | 1711.01 |
| <b>Fluctuating RE</b>            | <b>RunOfRiver</b>   | -                     | 5280.63 | 5356.07 | 5499.29 |
|                                  | <b>PV</b>           | -                     | 1314.15 | 1086.74 | 987.25  |
|                                  | <b>WindOff</b>      | -                     | 2295.93 | 1967.94 | 1421.29 |
|                                  | <b>WindOn</b>       | -                     | 1126.10 | 1071.43 | 983.97  |
| <b>Storage</b>                   | <b>HydroStorage</b> | -                     | 1804.16 | 1705.76 | 1640.17 |
|                                  | <b>LilonBattery</b> | -                     | 437.32  | 300.66  | 218.66  |
|                                  | <b>Pstorage</b>     | -                     | 710.64  | 710.64  | 710.64  |

Table S24.: Variable Costs [€<sub>2014</sub>/kWh]

|                           | [NPS <sup>+</sup> 12] | [HHM11]   | [Hun15]   | [MW12]    | [Pal13] | [BPG <sup>+</sup> 15] | Final     |
|---------------------------|-----------------------|-----------|-----------|-----------|---------|-----------------------|-----------|
|                           |                       | 2020      | 2030      |           |         |                       |           |
| Conventional Power Plants | CCGT                  | 0.0003    | 0.0021    | 0.0054    | 0.0022  | 0.0008                | 0.0025    |
|                           | GT_NGAS               | 0.0003    | 0.0011    | 0.0011    | 0.0023  | 0.0016                | 0.0027    |
|                           | IC                    | 0.0001    | 0.0011    | 0.0011    | -       | -                     | 0.0011    |
|                           | ST_Coal               | 0.0001    | 0.0011    | 0.0011    | 0.0045  | 0.0016                | 0.0027    |
|                           | ST_Lignite            | 0.0001    | 0.0011    | 0.0011    | 0.0049  | -                     | 0.0031    |
| Controllable RE           | ST_Nuclear            | 0.0001    | 0.0129    | 0.0129    | 0.0006  | 0.0032                | 0.0052    |
|                           | Biomass               | 0.0000    | 0.0097    | 0.0097    | -       | -                     | 0.0097    |
|                           | CSP                   | 0.0000    | 0.0000    | 0.0000    | -       | -                     | 0.0000001 |
|                           | HydroRes              | 0.0000    | 0.0086    | 0.0086    | -       | -                     | 0.0000001 |
|                           | RunOffRiver           | 0.0000000 | -         | -         | -       | -                     | 0.0000001 |
| Fluctuating RE            | PV                    | 0.0000001 | 0.0000000 | 0.0000000 | -       | -                     | 0.0000001 |
|                           | WindOff               | 0.0000001 | 0.0000000 | 0.0000000 | -       | -                     | 0.0000001 |
|                           | WindOn                | 0.0000001 | 0.0000000 | 0.0000000 | -       | -                     | 0.0000001 |
| Storage                   | HydroStorage          | 0.0000000 | -         | -         | -       | -                     | 0.0000001 |
|                           | LilonBattery          | 0.0000000 | -         | -         | -       | -                     | 0.0000001 |
|                           | Pstorage              | 0.0000000 | -         | -         | -       | -                     | 0.0000001 |

Table S25.: Tear and Wear Costs [€<sub>2014</sub>/kW]

|                                  |                     | [NPS <sup>+</sup> 12] | [Hun15] | [BPG <sup>+</sup> 15] | Final  |
|----------------------------------|---------------------|-----------------------|---------|-----------------------|--------|
| <b>Conventional Power Plants</b> | <b>CCGT</b>         | 0.0005                | 0.0094  | 0.0005                | 0.0017 |
|                                  | <b>GT_NGAS</b>      | 0.0005                | 0.0094  | 0.0005                | 0.0002 |
|                                  | <b>IC</b>           | 0.0005                | -       | -                     | 0.0009 |
|                                  | <b>ST_Coal</b>      | 0.0016                | 0.0059  | 0.0016                | 0.0024 |
|                                  | <b>ST_Lignite</b>   | 0.0016                | 0.0059  | 0.0016                | 0.0042 |
|                                  | <b>ST_Nuclear</b>   | 0.0016                | 0.0023  | 0.0016                | 0.0023 |
| <b>Controllable RE</b>           | <b>Biomass</b>      | -                     | -       | -                     | -      |
|                                  | <b>CSP</b>          | -                     | -       | -                     | -      |
|                                  | <b>HydroRes</b>     | -                     | -       | -                     | -      |
|                                  | <b>RunOfRiver</b>   | -                     | -       | -                     | -      |
| <b>Fluctuating RE</b>            | <b>PV</b>           | -                     | -       | -                     | -      |
|                                  | <b>WindOff</b>      | -                     | -       | -                     | -      |
|                                  | <b>WindOn</b>       | -                     | -       | -                     | -      |
|                                  | <b>HydroStorage</b> | -                     | -       | -                     | -      |
| <b>Storage</b>                   | <b>LilonBattery</b> | -                     | -       | -                     | -      |
|                                  | <b>Pstorage</b>     | -                     | -       | -                     | -      |

 Table S26.: Emission factors per fuel [NPS<sup>+</sup>12, WAE12]

| <b>Fuel</b> | <b>Emission factor</b> |
|-------------|------------------------|
| Biomass     | 0                      |
| Coal        | 0.3348                 |
| Lignite     | 0.3996                 |
| Natural Gas | 0.2016                 |
| Nuclear     | 0                      |
| Oil         | 0.2640                 |

Table S27.: Efficiencies by technology and age group

|             | <b>Lignite</b> | <b>Coal</b> | <b>CCGT</b> | <b>Gas Turbine</b> | <b>IC</b> | <b>Nuclear</b> |
|-------------|----------------|-------------|-------------|--------------------|-----------|----------------|
| <b>1970</b> | 0.355          | 0.387       | 0.409       | 0.234              | 0.457     | 0.324          |
| <b>1980</b> | 0.380          | 0.407       | 0.429       | 0.274              | 0.457     | 0.324          |
| <b>1990</b> | 0.395          | 0.417       | 0.509       | 0.324              | 0.457     | 0.324          |
| <b>2000</b> | 0.425          | 0.467       | 0.559       | 0.374              | 0.457     | 0.324          |
| <b>2010</b> | 0.455          | 0.495       | 0.590       | 0.400              | 0.457     | 0.324          |
| <b>2020</b> | 0.495          | 0.540       | 0.610       | 0.440              | 0.457     | 0.324          |
| <b>2030</b> | 0.520          | 0.550       | 0.630       | 0.460              | 0.457     | 0.324          |
| <b>2040</b> | 0.520          | 0.550       | 0.630       | 0.470              | 0.457     | 0.324          |
| <b>2050</b> | 0.520          | 0.550       | 0.630       | 0.470              | 0.457     | 0.324          |



Table S28.: Technology Parameters, Storage 1 (based on DLR internal assessment of various sources [AAG<sup>+</sup>12, CCY<sup>+</sup>09, FLLS12, DFF<sup>+</sup>09, JWM07, HEB<sup>+</sup>12, Sau09, MM12, Eur03])

| Technology      | Year | Invest<br>Storage | Invest<br>Con-<br>verter | AmorTime |           | LifeTime |           |
|-----------------|------|-------------------|--------------------------|----------|-----------|----------|-----------|
|                 |      |                   |                          | Storage  | Converter | Storage  | Converter |
| HydrogenStorage | 2020 | 0.69              | 1639.95                  | 30       | 15        | 30       | 15        |
| HydrogenStorage | 2030 | 0.71              | 1530.62                  | 30       | 15        | 30       | 15        |
| HydrogenStorage | 2050 | 0.77              | 1311.96                  | 30       | 15        | 30       | 15        |
| LilonBattery    | 2020 | 327.99            | 109.33                   | 21       | 21        | 21       | 21        |
| LilonBattery    | 2030 | 245.99            | 54.66                    | 22       | 22        | 22       | 22        |
| LilonBattery    | 2050 | 163.99            | 54.66                    | 25       | 25        | 25       | 25        |
| PumpedStorage   | 2020 | 10.93             | 579.45                   | 25       | 25        | 60       | 30        |
| PumpedStorage   | 2030 | 10.93             | 546.65                   | 25       | 25        | 60       | 30        |
| PumpedStorage   | 2050 | 10.93             | 491.98                   | 25       | 25        | 60       | 30        |

Table S29.: Technology Parameters, Storage 2 (based on DLR internal assessment of various sources [AAG<sup>+</sup>12, CCY<sup>+</sup>09, FLS12, DFF<sup>+</sup>09, JWM07, HEB<sup>+</sup>12, Sau09, MM12, Eur03])

| Technology      | Year | Storage To Converter Ratio | Eta Charge | Eta Dis-charge | Self Dis-charge Rate | Availability | CapCredit |
|-----------------|------|----------------------------|------------|----------------|----------------------|--------------|-----------|
| HydrogenStorage | 2020 | 200                        | 0.71       | 0.60           | 0.000000             | 0.95         | 0.8       |
| HydrogenStorage | 2030 | 200                        | 0.73       | 0.62           | 0.000000             | 0.95         | 0.8       |
| HydrogenStorage | 2050 | 200                        | 0.75       | 0.62           | 0.000000             | 0.95         | 0.8       |
| LilonBattery    | 2020 | 10                         | 0.93       | 0.93           | 0.000071             | 0.98         | 0.8       |
| LilonBattery    | 2030 | 10                         | 0.94       | 0.94           | 0.000071             | 0.98         | 0.8       |
| LilonBattery    | 2050 | 10                         | 0.97       | 0.97           | 0.000011             | 0.98         | 0.8       |
| PumpedStorage   | 2020 | 7                          | 0.89       | 0.89           | 0.000005             | 0.9          | 0.8       |
| PumpedStorage   | 2030 | 7                          | 0.89       | 0.89           | 0.000005             | 0.9          | 0.8       |
| PumpedStorage   | 2050 | 7                          | 0.91       | 0.91           | 0.000005             | 0.9          | 0.8       |

## E Variable Factors: Literature Values

To allow for comparison between literature values, all cost values found in literature were transformed into  $\text{€}_{2014}$  under consideration of the yearly averaged US-Dollar to Euro change rate and by assuming a yearly inflation rate of 1,8%. In case of the demand development, values found in literature referred to relative value changes, or were based on electricity consumption values from years previous to 2014. Therefore, on base of the provided data the relative changes were considered and applied on the available 2014 value. For the evaluation of other parameters, if no values were specifically given for the in this study modeled years, interpolation between given values was done. An overview of the literature and used values is given in the following tables.

### **Variations consistency**

For analysis of the effect of single parameters on the system, only one parameter was varied, whereas the others were assumed to remain as defined in the base scenario trend. After analysing the consistency of the corresponding descriptor-state combinations, some scenarios appeared to be less probable or inconsistent. High fuel prices are only present in the 25 consistent scenarios in relation with a global development into a “Fortress World”, where international order is based on military power. In such case, the agreement on common political measures is very restricted, so that rather low CO<sub>2</sub>-allowance prices could be expected. In case of medium fuel prices, low demand is unlikely to be expected, if considering it in combination with the base scenario assumptions. These imply economic and population growth, and high RE-share; and exclude social values development towards consume renouncement. In these cases, the affected parameters should be varied jointly to ensure consistency. However, analysis of the impact of single parameters on the system is pursued. This should, hence, be taken into account by hindsight, if probabilities are assigned to single paths.

Table S30.: Final Electricity Consumption Development [TWh]

| <b>Source</b>        | <b>2014</b> | <b>2020</b> | <b>2030</b> | <b>2050</b> |
|----------------------|-------------|-------------|-------------|-------------|
| [ENT15]              | 3176.80     | -           | -           | -           |
| [Eur11a]             | -           | -           | -           | 3131.86     |
|                      | -           | -           | -           | 3392.85     |
| [Unt14]              | -           | 3292.27     | 3494.11     | 3935.69     |
|                      | -           | -           | -           | -           |
|                      | -           | -           | -           | -           |
| [ZLM10]              | -           | 3474.24     | 3574.79     | 5254.39     |
| <b>Max</b>           | 3176.80     | 3474.24     | 3574.79     | 5254.39     |
| <b>Min</b>           | 3176.80     | 2954.82     | 3006.23     | 2979.95     |
| <b>Base Scenario</b> | 3176.80     | 3127.96     | 3195.75     | 3738.10     |
| <b>High</b>          | 3176.80     | 3301.10     | 3385.27     | 4496.24     |
| <b>Low</b>           | 3176.80     | 2954.82     | 3006.23     | 2979.95     |

Table S31.: Final Electricity Consumption Development per European region [TWh]

| Region         | Year | Base Scenario | High   | Low    |
|----------------|------|---------------|--------|--------|
| Austria        | 2020 | 75.06         | 79.21  | 70.9   |
| Belgium        | 2020 | 90.65         | 95.67  | 85.64  |
| Czech Republic | 2020 | 67.15         | 70.87  | 63.43  |
| Denmark_E      | 2020 | 13.45         | 14.2   | 12.71  |
| Denmark_W      | 2020 | 22.61         | 23.87  | 21.36  |
| Finland        | 2020 | 90.22         | 95.22  | 85.23  |
| France         | 2020 | 504.39        | 532.31 | 476.48 |
| Ireland        | 2020 | 28.38         | 29.95  | 26.81  |
| Italy          | 2020 | 334.02        | 352.51 | 315.54 |
| Liechtenstein  | 2020 | 0.22          | 0.23   | 0.2    |
| Luxemburg      | 2020 | 6.82          | 7.2    | 6.45   |
| Netherlands    | 2020 | 120.11        | 126.76 | 113.47 |
| Norway         | 2020 | 135.6         | 143.11 | 128.1  |
| Poland         | 2020 | 159.11        | 167.91 | 150.3  |
| Portugal       | 2020 | 52.64         | 55.55  | 49.72  |
| Slovakia       | 2020 | 28.27         | 29.83  | 26.7   |
| Spain          | 2020 | 279.22        | 294.68 | 263.77 |
| Sweden         | 2020 | 146.87        | 155    | 138.74 |
| Switzerland    | 2020 | 68.23         | 72.01  | 64.46  |
| UK             | 2020 | 358.07        | 377.89 | 338.25 |
| Austria        | 2030 | 76.68         | 81.23  | 72.14  |
| Belgium        | 2030 | 92.62         | 98.11  | 87.13  |
| Czech Republic | 2030 | 68.61         | 72.68  | 64.54  |
| Denmark_E      | 2030 | 13.74         | 14.56  | 12.93  |
| Denmark_W      | 2030 | 23.1          | 24.47  | 21.73  |
| Finland        | 2030 | 92.18         | 97.64  | 86.71  |
| France         | 2030 | 515.33        | 545.89 | 484.76 |
| Ireland        | 2030 | 28.99         | 30.71  | 27.27  |
| Italy          | 2030 | 341.26        | 361.5  | 321.03 |
| Liechtenstein  | 2030 | 0.22          | 0.23   | 0.21   |
| Luxemburg      | 2030 | 6.97          | 7.38   | 6.56   |
| Netherlands    | 2030 | 122.72        | 130    | 115.44 |
| Norway         | 2030 | 138.54        | 146.76 | 130.33 |
| Poland         | 2030 | 162.55        | 172.19 | 152.91 |
| Portugal       | 2030 | 53.78         | 56.97  | 50.59  |
| Slovakia       | 2030 | 28.88         | 30.59  | 27.17  |
| Spain          | 2030 | 285.27        | 302.19 | 268.35 |
| Sweden         | 2030 | 150.05        | 158.95 | 141.15 |
| Switzerland    | 2030 | 69.71         | 73.85  | 65.58  |
| UK             | 2030 | 365.83        | 387.52 | 344.13 |
| Austria        | 2050 | 89.7          | 107.89 | 71.51  |
| Belgium        | 2050 | 108.34        | 130.31 | 86.36  |
| Czech Republic | 2050 | 80.25         | 96.53  | 63.97  |
| Denmark_E      | 2050 | 16.08         | 19.34  | 12.82  |
| Denmark_W      | 2050 | 27.02         | 32.51  | 21.54  |
| Finland        | 2050 | 107.82        | 129.69 | 85.95  |
| France         | 2050 | 602.78        | 725.03 | 480.53 |
| Ireland        | 2050 | 33.91         | 40.79  | 27.03  |
| Italy          | 2050 | 399.18        | 480.14 | 318.22 |
| Liechtenstein  | 2050 | 0.26          | 0.31   | 0.21   |
| Luxemburg      | 2050 | 8.15          | 9.81   | 6.5    |
| Netherlands    | 2050 | 143.54        | 172.66 | 114.43 |
| Norway         | 2050 | 162.05        | 194.92 | 129.19 |
| Poland         | 2050 | 190.14        | 228.7  | 151.58 |
| Portugal       | 2050 | 62.91         | 75.66  | 50.15  |
| Slovakia       | 2050 | 33.78         | 40.63  | 26.93  |
| Spain          | 2050 | 333.68        | 401.36 | 266.01 |
| Sweden         | 2050 | 175.51        | 211.11 | 139.92 |
| Switzerland    | 2050 | 81.54         | 98.08  | 65.01  |
| UK             | 2050 | 427.91        | 514.7  | 341.13 |

Table S32.: Final Electricity Consumption Development per German region [TWh]

| Region | Year | Base Scenario | High  | Low   |
|--------|------|---------------|-------|-------|
| DAMP1  | 2020 | 8.89          | 9.38  | 8.4   |
| DAMP2  | 2020 | 41.78         | 44.09 | 39.47 |
| DAMP3  | 2020 | 25.78         | 27.21 | 24.35 |
| DAMP4  | 2020 | 32.18         | 33.97 | 30.4  |
| DAMP5  | 2020 | 37.71         | 39.79 | 35.62 |
| DAMP6  | 2020 | 11.64         | 12.29 | 11    |
| DEnBW1 | 2020 | 15.33         | 16.17 | 14.48 |
| DEnBW2 | 2020 | 49.26         | 51.99 | 46.53 |
| DTPS0  | 2020 | 0             | 0     | 0     |
| DTPS1  | 2020 | 16.15         | 17.05 | 15.26 |
| DTPS2  | 2020 | 24.6          | 25.96 | 23.24 |
| DTPS3  | 2020 | 36.43         | 38.45 | 34.42 |
| DTPS4  | 2020 | 22.78         | 24.04 | 21.52 |
| DTPS5  | 2020 | 31.78         | 33.54 | 30.02 |
| DTPS6  | 2020 | 28.05         | 29.61 | 26.5  |
| DVET0  | 2020 | 0             | 0     | 0     |
| DVET1  | 2020 | 61.3          | 64.7  | 57.91 |
| DVET2  | 2020 | 10.85         | 11.45 | 10.25 |
| DVET3  | 2020 | 46.82         | 49.42 | 44.23 |
| DVET4  | 2020 | 45.51         | 48.03 | 42.99 |
| DAMP1  | 2030 | 9.08          | 9.62  | 8.54  |
| DAMP2  | 2030 | 42.69         | 45.22 | 40.16 |
| DAMP3  | 2030 | 26.34         | 27.9  | 24.78 |
| DAMP4  | 2030 | 32.88         | 34.83 | 30.93 |
| DAMP5  | 2030 | 38.52         | 40.81 | 36.24 |
| DAMP6  | 2030 | 11.89         | 12.6  | 11.19 |
| DEnBW1 | 2030 | 15.66         | 16.59 | 14.73 |
| DEnBW2 | 2030 | 50.33         | 53.31 | 47.34 |
| DTPS0  | 2030 | 0             | 0     | 0     |
| DTPS1  | 2030 | 16.5          | 17.48 | 15.52 |
| DTPS2  | 2030 | 25.13         | 26.62 | 23.64 |
| DTPS3  | 2030 | 37.22         | 39.43 | 35.02 |
| DTPS4  | 2030 | 23.28         | 24.66 | 21.9  |
| DTPS5  | 2030 | 32.47         | 34.4  | 30.54 |
| DTPS6  | 2030 | 28.66         | 30.36 | 26.96 |
| DVET0  | 2030 | 0             | 0     | 0     |
| DVET1  | 2030 | 62.63         | 66.35 | 58.92 |
| DVET2  | 2030 | 11.08         | 11.74 | 10.43 |
| DVET3  | 2030 | 47.84         | 50.68 | 45    |
| DVET4  | 2030 | 46.5          | 49.25 | 43.74 |
| DAMP1  | 2050 | 10.63         | 12.78 | 8.47  |
| DAMP2  | 2050 | 49.93         | 60.06 | 39.8  |
| DAMP3  | 2050 | 30.81         | 37.06 | 24.56 |
| DAMP4  | 2050 | 38.46         | 46.26 | 30.66 |
| DAMP5  | 2050 | 45.06         | 54.2  | 35.92 |
| DAMP6  | 2050 | 13.91         | 16.73 | 11.09 |
| DEnBW1 | 2050 | 18.31         | 22.03 | 14.6  |
| DEnBW2 | 2050 | 58.87         | 70.81 | 46.93 |
| DTPS0  | 2050 | 0             | 0     | 0     |
| DTPS1  | 2050 | 19.3          | 23.22 | 15.39 |
| DTPS2  | 2050 | 29.39         | 35.36 | 23.43 |
| DTPS3  | 2050 | 43.54         | 52.37 | 34.71 |
| DTPS4  | 2050 | 27.23         | 32.75 | 21.7  |
| DTPS5  | 2050 | 37.98         | 45.68 | 30.28 |
| DTPS6  | 2050 | 33.53         | 40.32 | 26.73 |
| DVET0  | 2050 | 0             | 0     | 0     |
| DVET1  | 2050 | 73.26         | 88.12 | 58.4  |
| DVET2  | 2050 | 12.96         | 15.59 | 10.33 |
| DVET3  | 2050 | 55.96         | 67.31 | 44.61 |
| DVET4  | 2050 | 54.39         | 65.42 | 43.36 |

Table S33.: Usable areas: Literature Values

| Source              | Technology | Area Type                            | [Sch12] | [Hel10]                | [Hoo04]     | [Ste14] |
|---------------------|------------|--------------------------------------|---------|------------------------|-------------|---------|
| <b>PV</b>           |            | agricultural land                    | 0.0003  | 0.10 - 0.35            | 0.01        | 0       |
|                     |            | grassland                            | 0.0003  | 0.35                   | 0.01 - 0.05 | 1       |
|                     |            | bare areas                           | 0.3300  | 0.10 - 0.80            | 0.05        | 1       |
| <b>Wind Onshore</b> |            | sparsely vegetated areas             | 0.3300  | 0.80                   | 0.01        | 1       |
|                     |            | bare areas                           | 0.3300  | 0.10 - 0.80            | 1.00        | 1       |
|                     |            | sparsely vegetated areas             | 0.3300  | 0.80                   | 0.90        | 1       |
|                     |            | grassland                            | 0.0300  | 0.35                   | 0.50 - 0.80 | 1       |
|                     |            | agricultural areas                   | 0.0300  | 0.1 - 0.35             | 0.70        | 0       |
|                     |            | shrub cover                          | 0.0300  | 0.50                   | 0.50        | 1       |
|                     |            | mosaic (cropland, shrub, tree cover) | 0.0300  | 0.50                   | 0.10 - 0.70 | 1       |
|                     |            | forest                               | 0.0300  | 0.10                   | 0.10        | 0       |
|                     |            | open ocean (5km distance from coast) | 0.16    | - (30 GW in Germany)   | -           | 0.75    |
|                     |            | bare and sparsely vegetated areas    | 0.33    | - (60 TWh/a in Europe) | -           | 1       |
| <b>CSP</b>          |            |                                      |         |                        |             |         |

Table S34.: Usable Areas: Base Scenario, Minimum and Maximum values

| Technology    | Area Type                                                  | Min    | Base Scenario | Max  |
|---------------|------------------------------------------------------------|--------|---------------|------|
| PV            | agricultural and grassland                                 | 0.0003 | 0.0003        | 0.35 |
|               | bare and sparsely vegetated areas                          | 0.01   | 0.33          | 0.8  |
| Wind Onshore  | agricultural land, grassland, shrubland, mosaic and forest | 0.03   | 0.03          | 0.8  |
|               | bare and sparsely vegetated areas                          | 0.1    | 0.33          | 1    |
| Wind offshore | open ocean (5km distance from coast)                       |        | 0.16          |      |
| CSP           | bare and sparsely vegetated areas                          |        | 0.0003        |      |



Table S35.: Coal Prices Development [€<sub>2014</sub>/MWh]

| Source                | 2014 | 2020  | 2030  | 2050  |
|-----------------------|------|-------|-------|-------|
| [Inf15]               | 6.52 | -     | -     | -     |
| [Hun15]               | -    | 4.23  | -0.48 | -     |
| [Unt14]               | -    | 14.39 | 14.82 | 15.79 |
| [Eur11a]              | -    | 17.59 | 20.45 | 17.90 |
|                       | -    | 9.80  | 10.65 | 10.34 |
|                       | -    | 12.84 | 14.59 | 14.99 |
| [BCB <sup>+</sup> 11] | -    | 12.17 | 12.52 | -     |
| [NBH <sup>+</sup> 14] | -    | 19.51 | 23.88 | 29.85 |
|                       | -    | 18.65 | 21.11 | 24.30 |
|                       | -    | 17.78 | 18.34 | 18.75 |
| <b>Max</b>            | 6.52 | 19.51 | 23.88 | 29.85 |
| <b>Min</b>            | 6.52 | 4.23  | 10.65 | 10.34 |
| <b>Base Scenario</b>  | 6.52 | 11.84 | 16.94 | 16.75 |
| <b>High</b>           | 6.52 | 19.08 | 22.49 | 27.08 |
| <b>Low</b>            | 6.52 | 6.89  | 12.04 | 11.88 |

Table S36.: Gas Prices Development [€<sub>2014</sub>/MWh]

| Source                | 2014  | 2020  | 2030  | 2050  |
|-----------------------|-------|-------|-------|-------|
| [Inf15]               | 20.95 | -     | -     | -     |
| [Hun15]               | -     | 37.57 | -4.79 | -     |
| [Unt14]               | -     | 30.18 | 32.33 | 36.62 |
| [Eur11a]              | -     | 38.26 | 45.43 | 57.73 |
|                       | -     | 19.56 | 22.78 | 24.21 |
|                       | -     | 27.79 | 34.28 | 44.04 |
| [BCB <sup>+</sup> 11] | -     | 29.89 | 33.63 | -     |
| [NBH <sup>+</sup> 14] | -     | 42.98 | 53.85 | 64.76 |
|                       | -     | 40.79 | 46.79 | 52.32 |
|                       | -     | 38.59 | 39.73 | 39.89 |
| <b>Max</b>            | 20.95 | 42.98 | 53.85 | 64.76 |
| <b>Min</b>            | 20.95 | 19.56 | 22.78 | 24.21 |
| <b>Base Scenario</b>  | 20.95 | 31.17 | 36.34 | 38.39 |
| <b>High</b>           | 20.95 | 42.98 | 52.25 | 55.06 |
| <b>Low</b>            | 20.95 | 21.02 | 24.44 | 23.68 |

Table S37.: Lignite Prices Development [ $\text{€}_{2014}/\text{MWh}$ ]

| Source                | 2014 | 2020  | 2030  | 2050  |
|-----------------------|------|-------|-------|-------|
| [Inf15]               | 3.38 | -     | -     | -     |
| [Hun15]               | -    | 3.87  | 3.87  | -     |
| [Unt14]               | -    | 1.50  | 1.50  | 1.50  |
| [Eur11a]              | -    | -     | -     | -     |
|                       | -    | -     | -     | -     |
|                       | -    | -     | -     | -     |
| [NBH <sup>+</sup> 14] | -    | 19.51 | 23.88 | 29.85 |
|                       | -    | 18.65 | 21.11 | 24.30 |
|                       | -    | 17.78 | 18.34 | 18.75 |
| <b>Max</b>            | 3.38 | 7.08  | 7.87  | 11.02 |
| <b>Min</b>            | 3.38 | 1.50  | 1.50  | 1.50  |
| <b>Base Scenario</b>  | 3.38 | 4.78  | 4.86  | 5.43  |
| <b>High</b>           | 3.38 | 6.99  | 7.52  | 10.04 |
| <b>Low</b>            | 3.38 | 2.10  | 2.10  | 2.10  |

Table S38.: Oil Prices Development [ $\text{€}_{2014}/\text{MWh}$ ]

| Source                | 2014  | 2020   | 2030   | 2050   |
|-----------------------|-------|--------|--------|--------|
| [Inf15]               | 46.30 | -      | -      | -      |
| [Hun15]               | -     | 56.60  | 79.59  | -      |
| [Unt14]               | -     | 106.32 | 118.14 | 124.58 |
| [Eur11a]              | -     | 59.16  | 66.82  | 72.64  |
|                       | -     | 35.27  | 40.95  | 37.55  |
|                       | -     | 39.56  | 47.39  | 56.75  |
| [BCB <sup>+</sup> 11] | -     | 77.07  | 83.25  | -      |
| [NBH <sup>+</sup> 14] | -     | 106.32 | 118.14 | 116.00 |
|                       | -     | 62.33  | 72.69  | 72.88  |
|                       | -     | 35.27  | 40.95  | 37.55  |
| <b>Max</b>            | 46.30 | 106.32 | 118.14 | 116.00 |
| <b>Min</b>            | 46.30 | 35.27  | 40.95  | 37.55  |
| <b>Base Scenario</b>  | 46.30 | 62.33  | 72.69  | 76.77  |
| <b>High</b>           | 46.30 | 93.13  | 104.50 | 110.12 |
| <b>Low</b>            | 46.30 | 42.03  | 48.88  | 47.35  |

Table S39.: Interest Rate [%]

| Source                | 2014 | 2020  | 2030  | 2050  |
|-----------------------|------|-------|-------|-------|
| [NPS <sup>+</sup> 12] | 6.00 | 6.00  | 6.00  | 6.00  |
|                       | -    | 15.00 | 15.00 | 15.00 |
| [Hun15]               | -    | 5.00  | 5.00  | 5.00  |
|                       | -    | 9.00  | 9.00  | 9.00  |
| [Pal13]               | -    | 9.00  | 9.00  | 9.00  |
| [SW07]                | -    | 8.00  | 8.00  | 8.00  |
| [HHM11]               | -    | 7.00  | 7.00  | 7.00  |
| [OEC12]               | -    | 1.88  | 2.08  | 1.58  |
| <b>Max</b>            | 6.00 | 15.00 | 15.00 | 15.00 |
| <b>Min</b>            | 6.00 | 1.88  | 2.08  | 1.58  |
| <b>Base Scenario</b>  | 6.00 | 6.00  | 6.00  | 6.00  |
| <b>High</b>           | 6.00 | 8.50  | 11.00 | 11.00 |
| <b>Low</b>            | 6.00 | 4.04  | 2.08  | 2.08  |

Table S40.: CO<sub>2</sub> Allowance Prices Development [€<sub>2014</sub>/tCO<sub>2</sub>]

| Source                | 2014 | 2020       | 2030       | 2050       |
|-----------------------|------|------------|------------|------------|
| [EEX15]               | 6.01 | -          | -          | -          |
| [ZLM10]               | -    | 36.41      | 32.78      | 49.02      |
| [Hun15]               | -    | 17.61      | 53.54      |            |
|                       | -    | -          | 31.65      |            |
| [Unt14]               | -    | 26.85      | 37.59      | 52.84      |
| [Eur11a]              | -    | 20.03      | 44.52      | 55.65      |
|                       | -    | 16.69      | 35.62      | 56.76      |
|                       | -    | 16.69      | 27.82      | 260.44     |
|                       | -    | 27.82      | 57.87      | 294.94     |
|                       | -    | 27.82      | 38.95      | 317.20     |
|                       | -    | 27.82      | 61.21      | 300.50     |
|                       | -    | 22.26      | 70.12      | 345.02     |
| [BCB <sup>+</sup> 11] | -    | 25.29      | 33.72      | 37.94      |
|                       | -    | 37.94      | 80.09      | 101.17     |
| <b>Max</b>            | 6.01 | 37.94      | 80.09      | 345.02     |
| <b>Min</b>            | 6.01 | 16.69      | 27.82      | 37.94      |
| <b>Base Scenario</b>  | 6.01 | 27.3162865 | 53.9577885 | 191.480575 |
| <b>High</b>           | 6.01 | 37.9378996 | 80.0911213 | 345.02325  |
| <b>Low</b>            | 6.01 | 25.1361627 | 43.7449811 | 134.567724 |

## **F   Simulation Results**

The results presented here additionally comprise results obtained using a static implementation of the REMix model, which reveal technology lock-in effects when optimising using a myopic approach.

## E.1. Static vs Myopic

Table S41.: Net Power Generation [TWh], Storage

| Year | Approach | Hydrogen Storage | Pumped Storage | Li-Ion Battery |
|------|----------|------------------|----------------|----------------|
| 2020 | Static   | 0.00             | 23.15          | 0.13           |
| 2030 | Static   | 0.00             | 23.45          | 3.20           |
|      | Myopic   | 0.00             | 23.35          | 2.61           |
| 2050 | Static   | 202.91           | 29.27          | 22.48          |
|      | Myopic   | 206.80           | 30.43          | 19.77          |

Table S42.: Net Power Generation [TWh], Conventional Technologies

| Year | Approach | Nuclear | Coal   | Lignite | CCGT   | Gas Turbine | IC   |
|------|----------|---------|--------|---------|--------|-------------|------|
| 2020 | Static   | 899.78  | 262.60 | 543.40  | 275.09 | 8.59        | 0.02 |
| 2030 | Static   | 641.81  | 73.46  | 494.72  | 231.62 | 11.38       | 0.04 |
|      | Myopic   | 643.60  | 69.53  | 522.52  | 215.73 | 8.88        | 0.04 |
| 2050 | Static   | 57.56   | 0.89   | 0.14    | 36.98  | 10.46       | 0.00 |
|      | Myopic   | 48.32   | 1.32   | 6.70    | 35.04  | 3.13        | 0.00 |

Table S43.: Net Power Generation [TWh], Controllable Renewable Energies

| Year | Approach | Biomass | CSP  | Hydro Reservoir |
|------|----------|---------|------|-----------------|
| 2020 | Static   | 1.32    | 5.95 | 158.57          |
| 2030 | Static   | 1.67    | 5.90 | 167.80          |
|      | Myopic   | 1.66    | 5.91 | 167.32          |
| 2050 | Static   | 23.37   | 0.00 | 177.71          |
|      | Myopic   | 23.56   | 0.00 | 177.48          |

Table S44.: Net Power Generation [TWh], Fluctuating Renewable Energies

| Year | Approach | Run Of River | Wind Onshore | Wind Offshore | Photovoltaic |
|------|----------|--------------|--------------|---------------|--------------|
| 2020 | Static   | 338.44       | 59.94        | 553.16        | 51.65        |
| 2030 | Static   | 338.45       | 448.99       | 638.39        | 181.45       |
|      | Myopic   | 338.48       | 438.10       | 669.08        | 153.75       |
| 2050 | Static   | 322.96       | 2961.43      | 302.18        | 192.45       |
|      | Myopic   | 323.54       | 2896.37      | 387.07        | 187.25       |

Table generated by Excel2LaTeX from sheet 'TablesLatex'

Table S45.: Total Installed Capacities [GW], Storage

| Year | Approach | Hydrogen Storage | Pumped Storage | Li-Ion Battery |
|------|----------|------------------|----------------|----------------|
| 2020 | Static   | 0.00             | 34.01          | 0.32           |
| 2030 | Static   | 0.00             | 34.01          | 9.02           |
|      | Myopic   | 0.00             | 34.01          | 7.37           |
| 2050 | Static   | 131.44           | 34.01          | 33.00          |
|      | Myopic   | 133.48           | 34.01          | 30.72          |

Table S46.: Total Installed Capacities [GW], Conventional Technologies

| Year | Approach | Nuclear | Coal  | Lignite | CCGT   | Gas Turbine | IC   |
|------|----------|---------|-------|---------|--------|-------------|------|
| 2020 | Static   | 120.13  | 53.02 | 76.80   | 159.10 | 29.78       | 9.07 |
| 2030 | Static   | 83.55   | 23.53 | 75.78   | 114.98 | 30.30       | 3.81 |
|      | Myopic   | 83.55   | 23.53 | 80.95   | 114.98 | 28.28       | 3.81 |
| 2050 | Static   | 9.11    | 5.93  | 3.92    | 12.70  | 80.77       | 0.00 |
|      | Myopic   | 7.62    | 5.93  | 71.66   | 12.25  | 20.75       | 0.00 |

Table S47.: Total Installed Capacities [GW], Controllable Renewable Energies

| Year | Approach | Biomass | CSP  | Hydro Reservoir |
|------|----------|---------|------|-----------------|
| 2020 | Static   | 24.07   | 2.20 | 56.74           |
| 2030 | Static   | 24.07   | 2.20 | 57.57           |
|      | Myopic   | 24.07   | 2.20 | 57.57           |
| 2050 | Static   | 24.07   | 0.00 | 58.57           |
|      | Myopic   | 24.07   | 0.00 | 58.57           |

Table S48.: Total Installed Capacities [GW], Fluctuating Renewable Energies

| Year | Approach | Run Of River | Wind Onshore | Wind Offshore | Photovoltaic |
|------|----------|--------------|--------------|---------------|--------------|
| 2020 | Static   | 105.78       | 253.87       | 14.53         | 41.93        |
| 2030 | Static   | 105.78       | 280.37       | 110.12        | 145.91       |
|      | Myopic   | 105.78       | 302.23       | 106.77        | 123.07       |
| 2050 | Static   | 105.78       | 143.58       | 798.06        | 157.07       |
|      | Myopic   | 105.78       | 187.55       | 778.78        | 151.66       |

Table S49.: Averaged Full Load Hours [h], Storage

| Year | Approach | Hydrogen Storage | Pumped Storage | Li-Ion Battery |
|------|----------|------------------|----------------|----------------|
| 2020 | Static   | 141.60           | 716.16         | 1024.60        |
| 2030 | Static   | 30.56            | 710.35         | 492.07         |
|      | Myopic   | 106.97           | 710.11         | 504.52         |
| 2050 | Static   | 1463.21          | 845.70         | 688.90         |
|      | Myopic   | 1472.25          | 876.49         | 674.30         |

Table S50.: Averaged Full Load Hours [h], Conventional Technologies

| Year | Approach | Nuclear | Coal    | Lignite | CCGT    | Gas Turbine | IC    |
|------|----------|---------|---------|---------|---------|-------------|-------|
| 2020 | Static   | 7202.67 | 4633.12 | 6573.13 | 1603.90 | 195.92      | 7.72  |
| 2030 | Static   | 7333.62 | 2498.50 | 6770.93 | 2322.44 | 210.11      | 15.52 |
|      | Myopic   | 7364.88 | 2499.78 | 6672.36 | 2255.30 | 201.91      | 15.03 |
| 2050 | Static   | 6240.44 | 750.28  | 663.49  | 2288.50 | 103.19      | 25.56 |
|      | Myopic   | 5916.04 | 300.38  | 115.89  | 2247.03 | 189.03      | 16.91 |

Table S51.: Averaged Full Load Hours [h], Controllable Renewable Energies

| Year | Approach | Biomass | CSP     | Hydro Reservoir |
|------|----------|---------|---------|-----------------|
| 2020 | Static   | 52.52   | 1298.48 | 3139.60         |
| 2030 | Static   | 60.46   | 1074.43 | 3235.53         |
|      | Myopic   | 59.30   | 1013.99 | 3229.15         |
| 2050 | Static   | 1143.22 | 2727.92 | 3329.64         |
|      | Myopic   | 1149.39 | 2547.11 | 3325.56         |

Table S52.: Averaged Full Load Hours [h], Fluctuating Renewable Energies

| Year | Approach | Run Of River | Wind Onshore | Wind Offshore | Photovoltaic |
|------|----------|--------------|--------------|---------------|--------------|
| 2020 | Static   | 3098.66      | 2064.52      | 3105.27       | 1046.88      |
| 2030 | Static   | 3098.37      | 1994.70      | 2831.10       | 1047.40      |
|      | Myopic   | 3097.77      | 2012.68      | 3075.22       | 1047.55      |
| 2050 | Static   | 2967.87      | 1809.99      | 3372.23       | 933.30       |
|      | Myopic   | 2970.85      | 1853.04      | 3303.80       | 908.53       |

Table S53.: Installed Transmission Capacities [GW], From - To Region 1

|             |                 | <b>Austria</b> |                  | <b>BeNeLux</b> |                | <b>Denmark_W</b> |  |
|-------------|-----------------|----------------|------------------|----------------|----------------|------------------|--|
| <b>Year</b> | <b>Approach</b> | <b>Germany</b> | <b>Denmark_W</b> | <b>France</b>  | <b>Germany</b> | <b>Germany</b>   |  |
| 2020        | Static          | 4.93           | 0.70             | 3.40           | 1.28           | 0.73             |  |
| 2030        | Static          | 16.19          | 3.16             | 3.40           | 20.11          | 1.60             |  |
|             | Myopic          | 17.74          | 2.77             | 3.40           | 20.11          | 1.51             |  |
| 2050        | Static          | 22.29          | 20.74            | 3.40           | 35.44          | 46.73            |  |
|             | Myopic          | 23.36          | 17.71            | 3.40           | 37.17          | 47.51            |  |

Table S54.: Installed Transmission Capacities [GW], From - To Region 2

|             |                 | <b>France</b>  |                | <b>Iberia</b> | <b>Italy</b>   |               |
|-------------|-----------------|----------------|----------------|---------------|----------------|---------------|
| <b>Year</b> | <b>Approach</b> | <b>BeNeLux</b> | <b>Germany</b> | <b>France</b> | <b>Austria</b> | <b>France</b> |
| 2020        | Static          | -              | 3.20           | 3.30          | 0.22           | 2.58          |
| 2030        | Static          | 2.41           | 11.50          | 21.62         | 5.55           | 17.58         |
|             | Myopic          | 2.41           | 10.75          | 21.52         | 7.45           | 17.36         |
| 2050        | Static          | 26.73          | 12.94          | 25.24         | 10.86          | 34.18         |
|             | Myopic          | 22.23          | 13.21          | 26.42         | 10.64          | 34.50         |

Table S55.: Installed Transmission Capacities [GW], From - To Region 3

|             |                 | <b>Nordel</b>  |                  |                | <b>PolCzeSlk</b> |                |                |
|-------------|-----------------|----------------|------------------|----------------|------------------|----------------|----------------|
| <b>Year</b> | <b>Approach</b> | <b>BeNeLux</b> | <b>Denmark_W</b> | <b>Germany</b> | <b>PolCzeSlk</b> | <b>Austria</b> | <b>Germany</b> |
| 2020        | Static          | 0.70           | 2.60             | 4.00           | 0.60             | 0.60           | 2.60           |
| 2030        | Static          | 1.40           | 2.60             | 4.00           | 1.67             | 3.08           | 7.23           |
|             | Myopic          | 1.40           | 2.60             | 4.00           | 1.20             | 3.18           | 7.30           |
| 2050        | Static          | 1.40           | 12.32            | 5.75           | 40.21            | 9.45           | 8.65           |
|             | Myopic          | 1.40           | 12.03            | 4.00           | 37.88            | 7.75           | 9.48           |

Table S56.: Installed Transmission Capacities [GW], From - To Region 4

|             |                 | <b>Switzerland</b> |               |                | <b>UK_IE</b> |                |               |               |
|-------------|-----------------|--------------------|---------------|----------------|--------------|----------------|---------------|---------------|
| <b>Year</b> | <b>Approach</b> | <b>Austria</b>     | <b>France</b> | <b>Germany</b> | <b>Italy</b> | <b>BeNeLux</b> | <b>France</b> | <b>Nordel</b> |
| 2020        | Static          | 0.47               | 3.20          |                | 1.81         | 2.00           | 3.00          | 1.40          |
| 2030        | Static          | 0.47               | 5.56          | 6.26           | 2.81         | 4.11           | 11.53         | 2.33          |
|             | Myopic          | 0.47               | 5.65          | 6.24           | 2.81         | 4.77           | 12.04         | 2.44          |
| 2050        | Static          | 0.47               | 8.39          | 8.04           | 2.81         | 46.00          | 48.00         | 8.35          |
|             | Myopic          | 0.48               | 8.39          | 8.04           | 2.81         | 46.41          | 56.04         | 8.14          |



Table S57.: Total Installed Capacities per Region [GW], Storage

| Year | Approach | Region      | Hydrogen Storage | Li-Ion Battery | Pumped Storage |
|------|----------|-------------|------------------|----------------|----------------|
| 2020 | Static   | Austria     | 0.00             | 0.00           | 33.53          |
|      |          | BeNeLux     | 0.00             | 0.00           | 13.30          |
|      |          | Denmark_W   | 0.00             | 0.37           | -              |
|      |          | France      | 0.00             | 0.00           | 49.72          |
|      |          | Germany     | 0.00             | 0.00           | 69.51          |
|      |          | Iberia      | 0.00             | 0.00           | 69.33          |
|      |          | Italy       | 0.00             | 0.00           | 65.76          |
|      |          | Nordel      | 0.00             | 0.08           | 15.97          |
|      |          | PolCzeSlk   | 0.00             | 0.57           | 38.50          |
|      |          | Switzerland | 0.00             | 0.00           | 15.33          |
|      |          | UK_IE       | 0.00             | 1.78           | 3.21           |
| 2030 | Myopic   | Austria     | 0.00             | 0.00           | 33.53          |
|      |          | BeNeLux     | 0.00             | 0.20           | 13.30          |
|      |          | Denmark_W   | 0.00             | 7.79           | -              |
|      |          | France      | 0.00             | 0.00           | 49.72          |
|      |          | Germany     | 0.00             | 0.00           | 69.51          |
|      |          | Iberia      | 0.00             | 0.00           | 69.33          |
|      |          | Italy       | 0.00             | 0.00           | 65.76          |
|      |          | Nordel      | 0.00             | 3.84           | 15.97          |
|      |          | PolCzeSlk   | 0.00             | 0.68           | 38.50          |
|      |          | Switzerland | 0.00             | 0.00           | 15.33          |
|      |          | UK_IE       | 0.00             | 70.73          | 3.21           |
|      | Static   | Austria     | 0.00             | 0.00           | 33.53          |
|      |          | BeNeLux     | 0.00             | 0.33           | 13.30          |
|      |          | Denmark_W   | 0.00             | 9.31           | -              |
|      |          | France      | 0.00             | 0.00           | 49.72          |
|      |          | Germany     | 0.00             | 0.12           | 69.51          |
|      |          | Iberia      | 0.00             | 0.00           | 69.33          |
|      |          | Italy       | 0.00             | 0.00           | 65.76          |
|      |          | Nordel      | -                | 11.36          | 15.97          |
|      |          | PolCzeSlk   | 0.00             | 0.29           | 38.50          |
|      |          | Switzerland | 0.00             | 0.00           | 15.33          |
|      |          | UK_IE       | 0.00             | 86.16          | 3.21           |
| 2050 | Myopic   | Austria     | 0.06             | 0.33           | 33.53          |
|      |          | BeNeLux     | 35.70            | 3.13           | 13.30          |
|      |          | Denmark_W   | 253.58           | 7.88           | -              |
|      |          | France      | 31.43            | 0.40           | 49.72          |
|      |          | Germany     | 115.15           | 16.20          | 69.51          |
|      |          | Iberia      | 23.82            | 131.38         | 69.33          |
|      |          | Italy       | 0.49             | 107.74         | 65.76          |
|      |          | Nordel      | -                | 18.30          | 15.97          |
|      |          | PolCzeSlk   | 54.48            | 10.91          | 38.50          |
|      |          | Switzerland | 0.04             | 2.59           | 15.33          |
|      |          | UK_IE       | 682.95           | 69.04          | 3.21           |
|      | Static   | Austria     | 0.00             | 0.00           | 33.53          |
|      |          | BeNeLux     | 29.54            | 2.51           | 13.30          |
|      |          | Denmark_W   | 272.05           | 1.32           | -              |
|      |          | France      | 43.98            | 0.97           | 49.72          |
|      |          | Germany     | 124.74           | 34.35          | 69.51          |
|      |          | Iberia      | 19.17            | 156.68         | 69.33          |
|      |          | Italy       | 0.00             | 110.51         | 65.76          |
|      |          | Nordel      | -                | 28.91          | 15.97          |
|      |          | PolCzeSlk   | 53.17            | 43.33          | 38.50          |
|      |          | Switzerland | 0.00             | 1.27           | 15.33          |
|      |          | UK_IE       | 681.98           | 10.53          | 3.21           |

Table S58.: Total Installed Capacities per Region [GW], Conventional Technologies

| Year | Approach | Region      | Nuclear | Coal   | Lignite | CCGT   | Gas Turbine | IC    |
|------|----------|-------------|---------|--------|---------|--------|-------------|-------|
| 2020 | Static   | Austria     | 0.00    | 13.31  | 1.87    | 48.24  | 3.31        | 0.46  |
|      |          | BeNeLux     | 63.04   | 34.95  | 38.92   | 185.67 | 24.15       | 6.68  |
|      |          | Denmark_W   | 0.00    | 17.68  | 0.32    | 12.16  | 1.68        | 8.79  |
|      |          | France      | 724.70  | 20.78  | 14.77   | 63.20  | 45.43       | 8.36  |
|      |          | Germany     | 93.96   | 220.00 | 261.42  | 164.07 | 37.90       | 9.86  |
|      |          | Iberia      | 79.91   | 70.97  | 24.83   | 354.19 | 34.01       | 37.09 |
|      |          | Italy       | -       | 66.43  | 149.87  | 492.98 | 53.96       | 7.77  |
|      |          | Nordel      | 139.92  | 29.43  | 73.74   | 32.97  | 88.29       | 3.92  |
|      |          | PolCzeSlk   | 66.15   | 71.35  | 228.63  | 23.67  | 17.65       | 2.56  |
|      |          | Switzerland | 29.26   | 0.00   | 0.00    | 2.23   | 1.24        | 0.15  |
| 2030 | Myopic   | UK_IE       | 124.45  | 38.29  | 30.96   | 370.68 | 38.04       | 14.10 |
|      |          | Austria     | 0.00    | 0.51   | 18.76   | 38.63  | 0.00        | 0.31  |
|      |          | BeNeLux     | 0.00    | 23.06  | 101.82  | 112.93 | 20.84       | 3.14  |
|      |          | Denmark_W   | 0.00    | 9.43   | 1.38    | 0.69   | 1.76        | 3.02  |
|      |          | France      | 590.49  | 0.14   | 0.00    | 59.50  | 24.27       | 1.87  |
|      |          | Germany     | -       | 91.65  | 275.99  | 126.22 | 35.37       | 4.76  |
|      |          | Iberia      | 79.91   | 15.28  | 14.17   | 329.04 | 15.85       | 13.47 |
|      |          | Italy       | -       | 63.73  | 149.87  | 392.69 | 14.60       | 4.41  |
|      |          | Nordel      | 80.38   | 6.16   | 73.74   | 21.08  | 109.11      | 0.60  |
|      |          | PolCzeSlk   | 66.33   | 48.42  | 188.27  | 23.50  | 17.71       | 2.06  |
|      | Static   | Switzerland | 14.03   | 0.00   | 2.46    | 1.86   | 0.02        | 0.02  |
|      |          | UK_IE       | 88.04   | 0.47   | 51.58   | 206.74 | 90.87       | 8.24  |
|      |          | Austria     | 0.00    | 0.51   | 22.47   | 38.58  | 0.00        | 0.31  |
|      |          | BeNeLux     | 16.55   | 23.06  | 100.91  | 115.21 | 18.66       | 3.14  |
|      |          | Denmark_W   | 0.00    | 9.43   | 1.14    | 0.70   | 3.58        | 3.02  |
|      |          | France      | 590.49  | 0.14   | 0.00    | 59.50  | 24.27       | 1.87  |
|      |          | Germany     | -       | 91.65  | 260.25  | 134.52 | 38.56       | 4.76  |
|      |          | Iberia      | 79.91   | 15.28  | 2.86    | 329.04 | 15.85       | 13.47 |
|      |          | Italy       | -       | 63.73  | 105.20  | 392.69 | 14.60       | 4.41  |
|      |          | Nordel      | 80.38   | 6.16   | 22.14   | 24.22  | 127.47      | 0.60  |
|      |          | PolCzeSlk   | 89.44   | 48.42  | 142.50  | 42.70  | 15.60       | 2.06  |
|      |          | Switzerland | 14.03   | 0.00   | 3.36    | 1.86   | 0.02        | 0.02  |
|      |          | UK_IE       | 88.04   | 0.47   | 47.12   | 206.21 | 92.84       | 8.24  |
|      | Myopic   | Austria     | 0.00    | 0.00   | 18.76   | 5.50   | 0.96        | 0.00  |
|      |          | BeNeLux     | 0.01    | 8.80   | 101.83  | 8.20   | 24.15       | 0.00  |
|      |          | Denmark_W   | 0.01    | 0.00   | 1.38    | 0.69   | 1.78        | 0.00  |
|      |          | France      | 19.16   | 0.00   | 0.00    | 24.86  | 85.48       | 0.00  |
|      |          | Germany     | -       | 55.32  | 201.31  | 65.79  | 41.51       | 0.00  |
|      |          | Iberia      | 48.03   | 0.00   | 11.32   | 35.04  | 4.27        | 0.00  |
|      |          | Italy       | -       | 0.00   | 149.87  | 143.69 | 80.37       | 0.00  |
|      |          | Nordel      | 0.00    | 0.00   | 73.74   | 3.57   | 32.32       | 0.00  |
|      |          | PolCzeSlk   | 32.32   | 1.10   | 163.64  | 42.68  | 14.80       | 0.00  |
|      |          | Switzerland | -       | 0.00   | 2.46    | 1.34   | 2.85        | 0.00  |
|      | Static   | UK_IE       | 0.00    | 0.00   | 51.58   | 7.59   | 90.43       | 0.00  |
|      |          | Austria     | 0.00    | 0.00   | 0.00    | 6.21   | 36.45       | 0.00  |
|      |          | BeNeLux     | 0.00    | 8.80   | 0.00    | 7.91   | 37.37       | 0.00  |
|      |          | Denmark_W   | 0.00    | 0.00   | 0.00    | 0.00   | 0.00        | 0.00  |
|      |          | France      | 27.32   | 0.00   | 0.00    | 26.82  | 286.98      | 0.00  |
|      |          | Germany     | -       | 55.31  | 32.15   | 77.74  | 137.75      | 0.00  |
|      |          | Iberia      | 57.87   | 0.00   | 0.00    | 34.99  | 3.84        | 0.00  |
|      |          | Italy       | -       | 0.00   | 0.00    | 146.22 | 256.65      | 0.00  |
|      |          | Nordel      | 0.00    | 0.00   | 0.00    | 0.00   | 2.27        | 0.00  |
|      |          | PolCzeSlk   | 30.08   | 1.09   | 10.92   | 51.30  | 156.31      | 0.00  |
|      |          | Switzerland | -       | 0.00   | 0.00    | 1.45   | 13.14       | 0.00  |
|      |          | UK_IE       | 0.00    | 0.00   | 0.00    | 0.00   | 36.33       | 0.00  |

Table S59.: Total Installed Capacities per Region [GW], Controllable Renewables

| Year | Approach | Region      | Biomass | CSP   | Hydro Reservoir |
|------|----------|-------------|---------|-------|-----------------|
| 2020 | Static   | Austria     | 6.76    | -     | 56.40           |
|      |          | BeNeLux     | 27.50   | -     | -               |
|      |          | Denmark_W   | 4.94    | -     | -               |
|      |          | France      | 12.75   | 0.14  | 135.49          |
|      |          | Germany     | 38.33   | -     | 3.85            |
|      |          | Iberia      | 13.85   | 24.02 | 170.93          |
|      |          | Italy       | 22.21   | 0.00  | 25.85           |
|      |          | Nordel      | 79.88   | -     | 114.24          |
|      |          | PolCzeSlk   | 8.03    | -     | 10.81           |
|      |          | Switzerland | 4.85    | -     | 105.01          |
|      |          | UK_IE       | 45.65   | -     | 1.62            |
| 2030 | Myopic   | Austria     | 6.76    | -     | 60.50           |
|      |          | BeNeLux     | 27.50   | -     | -               |
|      |          | Denmark_W   | 4.94    | -     | -               |
|      |          | France      | 12.75   | 0.14  | 135.49          |
|      |          | Germany     | 38.33   | -     | 3.85            |
|      |          | Iberia      | 13.85   | 24.02 | 170.93          |
|      |          | Italy       | 22.21   | 0.00  | 25.85           |
|      |          | Nordel      | 79.88   | -     | 114.24          |
|      |          | PolCzeSlk   | 8.03    | -     | 10.81           |
|      |          | Switzerland | 4.85    | -     | 110.00          |
|      |          | UK_IE       | 45.65   | -     | 1.62            |
|      | Static   | Austria     | 6.76    | -     | 60.50           |
|      |          | BeNeLux     | 27.50   | -     | -               |
|      |          | Denmark_W   | 4.94    | -     | -               |
|      |          | France      | 12.75   | 0.14  | 135.49          |
|      |          | Germany     | 38.33   | -     | 3.85            |
|      |          | Iberia      | 13.85   | 24.02 | 170.93          |
|      |          | Italy       | 22.21   | 0.00  | 25.85           |
|      |          | Nordel      | 79.88   | -     | 114.24          |
|      |          | PolCzeSlk   | 8.03    | -     | 10.81           |
|      |          | Switzerland | 4.85    | -     | 110.00          |
|      |          | UK_IE       | 45.65   | -     | 1.62            |
| 2050 | Myopic   | Austria     | 6.76    | -     | 60.50           |
|      |          | BeNeLux     | 27.50   | -     | -               |
|      |          | Denmark_W   | 4.94    | -     | -               |
|      |          | France      | 12.75   | 0.01  | 135.49          |
|      |          | Germany     | 38.33   | -     | 3.85            |
|      |          | Iberia      | 13.85   | 0.02  | 170.93          |
|      |          | Italy       | 22.21   | 0.02  | 36.85           |
|      |          | Nordel      | 79.88   | -     | 114.24          |
|      |          | PolCzeSlk   | 8.03    | -     | 10.81           |
|      |          | Switzerland | 4.85    | -     | 110.00          |
|      |          | UK_IE       | 45.65   | -     | 1.62            |
|      | Static   | Austria     | 6.76    | -     | 60.50           |
|      |          | BeNeLux     | 27.50   | -     | -               |
|      |          | Denmark_W   | 4.94    | -     | -               |
|      |          | France      | 12.75   | 0.00  | 135.49          |
|      |          | Germany     | 38.33   | -     | 3.85            |
|      |          | Iberia      | 13.85   | 0.00  | 170.93          |
|      |          | Italy       | 22.21   | 0.00  | 36.85           |
|      |          | Nordel      | 79.88   | -     | 114.24          |
|      |          | PolCzeSlk   | 8.03    | -     | 10.81           |
|      |          | Switzerland | 4.85    | -     | 110.00          |
|      |          | UK_IE       | 45.65   | -     | 1.62            |

Table S60.: Total Installed Capacities per Region [GW], Fluctuating Renewables

| Year | Approach | Region      | Run Of River | Wind Onshore | Wind Offshore | Photovoltaic |
|------|----------|-------------|--------------|--------------|---------------|--------------|
| 2020 | Static   | Austria     | 42.57        | 37.56        | -             | 0.09         |
|      |          | BeNeLux     | 2.77         | 103.84       | 53.65         | 1.16         |
|      |          | Denmark_W   | 0.11         | 66.67        | 4.81          | 0.04         |
|      |          | France      | 175.81       | 348.58       | 0.00          | 12.81        |
|      |          | Germany     | 43.55        | 600.51       | 46.78         | 42.88        |
|      |          | Iberia      | 180.08       | 573.58       | 0.08          | 334.54       |
|      |          | Italy       | 169.95       | 254.89       | 0.00          | 66.93        |
|      |          | Nordel      | 423.74       | 133.13       | 6.16          | 0.04         |
|      |          | PolCzeSlk   | 34.17        | 106.42       | 0.55          | 4.64         |
|      |          | Switzerland | 35.80        | 0.74         | -             | 14.19        |
|      |          | UK_IE       | 55.08        | 500.99       | 49.90         | 20.09        |
| 2030 | Myopic   | Austria     | 42.57        | 33.79        | -             | 6.51         |
|      |          | BeNeLux     | 2.77         | 103.84       | 160.77        | 0.74         |
|      |          | Denmark_W   | 0.11         | 74.98        | 30.22         | 0.02         |
|      |          | France      | 175.81       | 793.36       | 0.00          | 12.47        |
|      |          | Germany     | 43.55        | 651.17       | 460.63        | 32.89        |
|      |          | Iberia      | 180.08       | 454.74       | 0.00          | 883.11       |
|      |          | Italy       | 169.95       | 190.10       | 0.00          | 392.10       |
|      |          | Nordel      | 423.74       | 118.33       | 246.86        | 0.04         |
|      |          | PolCzeSlk   | 34.17        | 418.24       | 0.00          | 3.42         |
|      |          | Switzerland | 35.80        | 0.00         | -             | 15.23        |
|      |          | UK_IE       | 55.08        | 592.33       | 156.19        | 20.07        |
|      | Static   | Austria     | 42.57        | 33.10        | -             | 7.47         |
|      |          | BeNeLux     | 2.77         | 103.84       | 134.49        | 0.74         |
|      |          | Denmark_W   | 0.11         | 74.98        | 35.96         | 0.02         |
|      |          | France      | 175.81       | 822.80       | 0.00          | 12.47        |
|      |          | Germany     | 43.55        | 651.17       | 449.33        | 32.89        |
|      |          | Iberia      | 180.08       | 399.83       | 0.00          | 948.88       |
|      |          | Italy       | 169.95       | 78.45        | 0.00          | 520.94       |
|      |          | Nordel      | 423.74       | 60.91        | 315.39        | 0.04         |
|      |          | PolCzeSlk   | 34.17        | 403.34       | 0.00          | 3.42         |
|      |          | Switzerland | 35.80        | 0.00         | -             | 15.91        |
|      |          | UK_IE       | 55.08        | 592.33       | 160.53        | 20.07        |
| 2050 | Myopic   | Austria     | 42.57        | 9.35         | -             | 93.32        |
|      |          | BeNeLux     | 2.77         | 48.97        | 362.90        | 0.01         |
|      |          | Denmark_W   | 0.11         | 74.98        | 947.88        | 0.01         |
|      |          | France      | 175.81       | 580.77       | 1028.97       | 11.70        |
|      |          | Germany     | 43.55        | 147.09       | 820.01        | 117.31       |
|      |          | Iberia      | 180.08       | 72.95        | 552.13        | 1062.76      |
|      |          | Italy       | 169.95       | 423.01       | 4.56          | 544.66       |
|      |          | Nordel      | 423.74       | 33.91        | 1572.35       | 0.01         |
|      |          | PolCzeSlk   | 34.17        | 346.42       | 36.37         | 5.57         |
|      |          | Switzerland | 35.80        | 0.09         | -             | 23.86        |
|      |          | UK_IE       | 55.08        | 592.33       | 2586.91       | 0.01         |
|      | Static   | Austria     | 42.57        | 4.08         | -             | 93.29        |
|      |          | BeNeLux     | 2.77         | 51.05        | 358.61        | 0.00         |
|      |          | Denmark_W   | 0.11         | 74.98        | 983.59        | 0.00         |
|      |          | France      | 175.81       | 364.84       | 1216.23       | 0.00         |
|      |          | Germany     | 43.55        | 32.06        | 845.90        | 129.11       |
|      |          | Iberia      | 180.08       | 137.15       | 510.87        | 1062.76      |
|      |          | Italy       | 169.95       | 432.09       | 4.55          | 549.13       |
|      |          | Nordel      | 423.74       | 0.00         | 1685.42       | 0.00         |
|      |          | PolCzeSlk   | 34.17        | 36.34        | 171.86        | 0.45         |
|      |          | Switzerland | 35.80        | 0.08         | -             | 23.42        |
|      |          | UK_IE       | 55.08        | 592.33       | 2450.33       | 0.00         |

Table S61.: Net Power Generation per Region [TWh], Conventional Technologies

| Year | Approach | Region      | Hydrogen Storage | Pumped Storage | Li-Ion Battery |
|------|----------|-------------|------------------|----------------|----------------|
| 2020 | Static   | Austria     | -                | 0.28           | 0.00           |
|      |          | BeNeLux     | 0.00             | 0.94           | 0.00           |
|      |          | Denmark_W   | 0.00             | -              | 0.00           |
|      |          | France      | 0.00             | 4.58           | 0.00           |
|      |          | Germany     | 0.00             | 6.28           | 0.00           |
|      |          | Iberia      | -                | 2.61           | 0.00           |
|      |          | Italy       | -                | 3.05           | 0.00           |
|      |          | Nordel      | 0.00             | 2.02           | 0.00           |
|      |          | PolCzeSlk   | 0.00             | 3.07           | 0.02           |
|      |          | Switzerland | -                | 0.01           | 0.00           |
|      |          | UK_IE       | 0.00             | 0.32           | 0.11           |
| 2030 | Myopic   | Austria     | 0.00             | 1.43           | 0.00           |
|      |          | BeNeLux     | 0.00             | 1.03           | 0.00           |
|      |          | Denmark_W   | 0.00             | -              | 0.39           |
|      |          | France      | 0.00             | 3.03           | 0.00           |
|      |          | Germany     | 0.00             | 4.73           | 0.00           |
|      |          | Iberia      | 0.00             | 5.07           | 0.00           |
|      |          | Italy       | 0.00             | 3.33           | 0.00           |
|      |          | Nordel      | -                | 1.25           | 0.00           |
|      |          | PolCzeSlk   | 0.00             | 2.60           | 0.02           |
|      |          | Switzerland | 0.00             | 0.61           | 0.00           |
|      |          | UK_IE       | 0.00             | 0.28           | 2.20           |
|      | Static   | Austria     | 0.00             | 1.37           | 0.00           |
|      |          | BeNeLux     | 0.00             | 0.99           | 0.00           |
|      |          | Denmark_W   | 0.00             | -              | 0.38           |
|      |          | France      | 0.00             | 2.99           | 0.00           |
|      |          | Germany     | 0.00             | 4.66           | 0.00           |
|      |          | Iberia      | 0.00             | 5.42           | 0.00           |
|      |          | Italy       | 0.00             | 3.11           | 0.00           |
|      |          | Nordel      | -                | 1.40           | 0.08           |
|      |          | PolCzeSlk   | 0.00             | 2.64           | 0.00           |
|      |          | Switzerland | 0.00             | 0.61           | 0.00           |
|      |          | UK_IE       | 0.00             | 0.26           | 2.74           |
| 2050 | Myopic   | Austria     | 0.00             | 2.60           | 0.00           |
|      |          | BeNeLux     | 4.58             | 0.98           | 0.00           |
|      |          | Denmark_W   | 49.72            | -              | 0.29           |
|      |          | France      | 7.06             | 3.67           | 0.00           |
|      |          | Germany     | 18.66            | 5.48           | 0.00           |
|      |          | Iberia      | 4.21             | 5.80           | 8.99           |
|      |          | Italy       | 0.00             | 5.62           | 8.30           |
|      |          | Nordel      | -                | 1.29           | 0.54           |
|      |          | PolCzeSlk   | 9.54             | 3.49           | 0.36           |
|      |          | Switzerland | 0.00             | 1.29           | 0.00           |
|      |          | UK_IE       | 113.04           | 0.22           | 1.29           |
|      | Static   | Austria     | 0.00             | 2.60           | 0.00           |
|      |          | BeNeLux     | 2.88             | 0.96           | 0.00           |
|      |          | Denmark_W   | 50.57            | -              | 0.00           |
|      |          | France      | 7.59             | 3.46           | 0.00           |
|      |          | Germany     | 18.22            | 5.39           | 0.54           |
|      |          | Iberia      | 3.36             | 5.57           | 10.90          |
|      |          | Italy       | 0.00             | 5.38           | 8.69           |
|      |          | Nordel      | -                | 1.21           | 0.62           |
|      |          | PolCzeSlk   | 8.95             | 3.25           | 1.71           |
|      |          | Switzerland | 0.00             | 1.24           | 0.01           |
|      |          | UK_IE       | 111.34           | 0.22           | 0.00           |

Table S62.: Net Power Generation per Region [TWh], Conventional Technologies

| Year | Approach | Region      | Nuclear | Coal   | Lignite | CCGT  | Gas Turbine | IC   |
|------|----------|-------------|---------|--------|---------|-------|-------------|------|
| 2020 | Static   | Austria     | -       | 5.19   | 0.00    | 12.51 | 0.00        | -    |
|      |          | BeNeLux     | 44.98   | 19.42  | 26.03   | 43.62 | 0.16        | 0.00 |
|      |          | Denmark_W   | 0.00    | 5.89   | 0.00    | 1.42  | 0.05        | 0.00 |
|      |          | France      | 483.13  | 1.28   | 3.62    | 1.26  | 0.00        | -    |
|      |          | Germany     | 66.95   | 102.04 | 164.49  | 37.04 | 1.23        | 0.00 |
|      |          | Iberia      | 55.47   | 37.42  | 8.54    | 34.76 | 0.00        | -    |
|      |          | Italy       | -       | 40.97  | 124.49  | 66.33 | 0.00        | -    |
|      |          | Nordel      | 99.06   | 8.08   | 46.85   | 6.09  | 6.47        | 0.00 |
|      |          | PolCzeSlk   | 47.23   | 25.37  | 154.16  | 2.80  | 0.43        | 0.01 |
|      |          | Switzerland | 20.89   | 0.00   | 0.00    | 0.00  | 0.00        | -    |
|      |          | UK_IE       | 82.08   | 16.95  | 15.22   | 69.26 | 0.24        | 0.00 |
| 2030 | Myopic   | Austria     | 0.00    | 0.08   | 17.61   | 7.92  | 0.00        | 0.00 |
|      |          | BeNeLux     | 0.00    | 6.37   | 77.04   | 26.80 | 0.16        | 0.01 |
|      |          | Denmark_W   | 0.00    | 1.38   | 0.00    | 0.00  | 0.00        | 0.01 |
|      |          | France      | 416.83  | 0.01   | 0.00    | 6.85  | 0.12        | 0.00 |
|      |          | Germany     | -       | 30.85  | 136.41  | 24.04 | 0.28        | 0.01 |
|      |          | Iberia      | 55.84   | 1.40   | 1.42    | 39.33 | 0.02        | 0.00 |
|      |          | Italy       | -       | 16.95  | 117.18  | 52.54 | 0.02        | 0.00 |
|      |          | Nordel      | 55.45   | 0.97   | 42.02   | 3.07  | 6.14        | 0.00 |
|      |          | PolCzeSlk   | 46.36   | 11.43  | 106.51  | 3.73  | 0.31        | 0.00 |
|      |          | Switzerland | 10.01   | 0.00   | 0.00    | 0.38  | 0.00        | 0.00 |
|      | Static   | UK_IE       | 59.11   | 0.10   | 24.34   | 51.06 | 1.83        | 0.01 |
|      |          | Austria     | 0.00    | 0.07   | 22.81   | 7.56  | 0.00        | 0.00 |
|      |          | BeNeLux     | 0.00    | 6.34   | 85.65   | 26.46 | 0.15        | 0.01 |
|      |          | Denmark_W   | 0.00    | 1.41   | 0.00    | 0.00  | 0.00        | 0.01 |
|      |          | France      | 416.25  | 0.01   | 0.00    | 6.28  | 0.15        | 0.00 |
|      |          | Germany     | -       | 31.07  | 147.00  | 23.78 | 0.28        | 0.01 |
|      |          | Iberia      | 55.51   | 1.25   | 1.43    | 40.56 | 0.02        | 0.00 |
|      |          | Italy       | -       | 20.41  | 81.87   | 68.32 | 0.04        | 0.00 |
|      |          | Nordel      | 54.51   | 1.08   | 14.27   | 3.44  | 8.63        | 0.00 |
|      |          | PolCzeSlk   | 46.36   | 11.72  | 107.21  | 3.79  | 0.29        | 0.00 |
| 2050 | Myopic   | Switzerland | 10.01   | 0.00   | 2.06    | 0.37  | 0.00        | 0.00 |
|      |          | UK_IE       | 59.17   | 0.10   | 32.41   | 51.05 | 1.81        | 0.01 |
|      |          | Austria     | 0.00    | 0.00   | 0.47    | 0.00  | 0.00        | 0.00 |
|      |          | BeNeLux     | 0.00    | 0.14   | 1.11    | 0.00  | 0.00        | 0.00 |
|      |          | Denmark_W   | 0.00    | 0.00   | 0.00    | 0.00  | 0.00        | 0.00 |
|      |          | France      | 0.00    | 0.00   | 0.00    | 0.00  | 0.00        | 0.00 |
|      |          | Germany     | -       | 1.15   | 1.46    | 0.00  | 0.00        | 0.00 |
|      |          | Iberia      | 35.64   | 0.00   | 0.00    | 0.00  | 0.00        | 0.00 |
|      |          | Italy       | -       | 0.00   | 1.88    | 35.02 | 2.21        | 0.00 |
|      |          | Nordel      | 0.00    | 0.00   | 0.26    | 0.00  | 0.22        | 0.00 |
|      | Static   | PolCzeSlk   | 12.68   | 0.03   | 1.32    | 0.02  | 0.06        | 0.00 |
|      |          | Switzerland | -       | 0.00   | 0.00    | 0.00  | 0.11        | 0.00 |
|      |          | UK_IE       | 0.00    | 0.00   | 0.19    | 0.00  | 0.52        | 0.00 |
|      |          | Austria     | -       | 0.00   | 0.00    | 0.00  | 0.42        | 0.00 |
|      |          | BeNeLux     | 0.00    | 0.07   | 0.00    | 0.00  | 0.00        | 0.00 |
|      |          | Denmark_W   | 0.00    | 0.00   | 0.00    | 0.00  | 0.00        | 0.00 |
|      |          | France      | 0.00    | 0.00   | 0.00    | 0.00  | 2.18        | 0.00 |
|      |          | Germany     | -       | 0.79   | 0.10    | 0.00  | 1.12        | 0.00 |
|      |          | Iberia      | 44.96   | 0.00   | 0.00    | 0.00  | 0.00        | 0.00 |
|      |          | Italy       | -       | 0.00   | 0.00    | 36.98 | 4.55        | 0.00 |
|      |          | Nordel      | 0.00    | 0.00   | 0.00    | 0.00  | 0.00        | 0.00 |
|      |          | PolCzeSlk   | 12.60   | 0.03   | 0.04    | 0.00  | 2.10        | 0.00 |
|      |          | Switzerland | -       | 0.00   | 0.00    | 0.00  | 0.09        | 0.00 |
|      |          | UK_IE       | 0.00    | 0.00   | 0.00    | 0.00  | 0.00        | 0.00 |

Table S63.: Net Power Generation per Region [TWh], Controllable Renewable Energies

| Year | Approach | Region      | Biomass | CSP  | Hydro Reservoir |
|------|----------|-------------|---------|------|-----------------|
| 2020 | Static   | Austria     | -       | -    | 20.75           |
|      |          | BeNeLux     | 0.01    | -    | -               |
|      |          | Denmark_W   | 0.02    | -    | -               |
|      |          | France      | -       | 0.03 | 31.25           |
|      |          | Germany     | 0.27    | -    | 1.75            |
|      |          | Iberia      | -       | 5.92 | 22.91           |
|      |          | Italy       | -       | 0.00 | 5.77            |
|      |          | Nordel      | 0.91    | -    | 45.62           |
|      |          | PolCzeSlk   | 0.03    | -    | 2.28            |
|      |          | Switzerland | -       | -    | 27.78           |
|      |          | UK_IE       | 0.09    | -    | 0.46            |
| 2030 | Myopic   | Austria     | 0.05    | -    | 24.86           |
|      |          | BeNeLux     | 0.16    | -    | -               |
|      |          | Denmark_W   | 0.03    | -    | -               |
|      |          | France      | 0.03    | 0.03 | 31.25           |
|      |          | Germany     | 0.30    | -    | 1.75            |
|      |          | Iberia      | 0.00    | 5.88 | 22.93           |
|      |          | Italy       | 0.02    | 0.00 | 5.77            |
|      |          | Nordel      | 0.75    | -    | 44.99           |
|      |          | PolCzeSlk   | 0.08    | -    | 2.28            |
|      |          | Switzerland | 0.02    | -    | 33.03           |
|      |          | UK_IE       | 0.22    | -    | 0.46            |
|      | Static   | Austria     | 0.04    | -    | 24.98           |
|      |          | BeNeLux     | 0.17    | -    | -               |
|      |          | Denmark_W   | 0.03    | -    | -               |
|      |          | France      | 0.03    | 0.03 | 31.25           |
|      |          | Germany     | 0.31    | -    | 1.75            |
|      |          | Iberia      | 0.01    | 5.86 | 22.93           |
|      |          | Italy       | 0.02    | 0.00 | 5.77            |
|      |          | Nordel      | 0.73    | -    | 45.45           |
|      |          | PolCzeSlk   | 0.08    | -    | 2.28            |
|      |          | Switzerland | 0.02    | -    | 32.92           |
|      |          | UK_IE       | 0.22    | -    | 0.46            |
| 2050 | Myopic   | Austria     | 0.88    | -    | 27.81           |
|      |          | BeNeLux     | 2.90    | -    | -               |
|      |          | Denmark_W   | 0.49    | -    | -               |
|      |          | France      | 1.32    | 0.00 | 31.07           |
|      |          | Germany     | 4.66    | -    | 1.74            |
|      |          | Iberia      | 1.12    | 0.00 | 22.81           |
|      |          | Italy       | 2.82    | 0.00 | 8.19            |
|      |          | Nordel      | 5.81    | -    | 45.59           |
|      |          | PolCzeSlk   | 1.28    | -    | 2.25            |
|      |          | Switzerland | 0.54    | -    | 37.57           |
|      |          | UK_IE       | 1.74    | -    | 0.44            |
|      | Static   | Austria     | 0.88    | -    | 27.99           |
|      |          | BeNeLux     | 2.90    | -    | -               |
|      |          | Denmark_W   | 0.49    | -    | -               |
|      |          | France      | 1.32    | 0.00 | 31.05           |
|      |          | Germany     | 4.73    | -    | 1.74            |
|      |          | Iberia      | 1.10    | 0.00 | 22.81           |
|      |          | Italy       | 2.80    | 0.00 | 8.19            |
|      |          | Nordel      | 5.67    | -    | 45.57           |
|      |          | PolCzeSlk   | 1.24    | -    | 2.25            |
|      |          | Switzerland | 0.55    | -    | 37.67           |
|      |          | UK_IE       | 1.69    | -    | 0.44            |

Table S64.: Net Power Generation per Region [TWh], Fluctuating Renewable Energies

| Year | Approach | Region      | Run Of River | Wind Onshore | Wind Offshore | Photovoltaic |
|------|----------|-------------|--------------|--------------|---------------|--------------|
| 2020 | Static   | Austria     | 15.65        | -            | 5.10          | 0.01         |
|      |          | BeNeLux     | 0.76         | 21.11        | 24.26         | 0.10         |
|      |          | Denmark_W   | 0.03         | 1.83         | 19.46         | 0.00         |
|      |          | France      | 40.53        | 0.00         | 65.31         | 1.23         |
|      |          | Germany     | 20.41        | 15.79        | 128.04        | 3.82         |
|      |          | Iberia      | 26.62        | 0.02         | 80.22         | 39.70        |
|      |          | Italy       | 37.95        | 0.00         | 34.83         | 3.24         |
|      |          | Nordel      | 164.11       | 1.96         | 23.14         | 0.00         |
|      |          | PolCzeSlk   | 7.29         | 0.16         | 18.75         | 0.43         |
|      |          | Switzerland | 9.47         | -            | 0.08          | 1.50         |
|      |          | UK_IE       | 15.62        | 19.07        | 153.98        | 1.60         |
| 2030 | Myopic   | Austria     | 15.65        | -            | 5.21          | 0.01         |
|      |          | BeNeLux     | 0.76         | 60.53        | 24.21         | 0.07         |
|      |          | Denmark_W   | 0.03         | 14.50        | 19.42         | 0.00         |
|      |          | France      | 40.53        | 0.00         | 134.70        | 1.20         |
|      |          | Germany     | 20.32        | 215.41       | 127.64        | 2.92         |
|      |          | Iberia      | 26.71        | 0.00         | 62.20         | 107.64       |
|      |          | Italy       | 37.95        | 0.00         | 26.12         | 38.38        |
|      |          | Nordel      | 164.10       | 78.28        | 19.14         | 0.00         |
|      |          | PolCzeSlk   | 7.28         | 0.00         | 83.19         | 0.32         |
|      |          | Switzerland | 9.47         | -            | 0.00          | 1.61         |
|      |          | UK_IE       | 15.67        | 69.37        | 167.25        | 1.60         |
|      | Static   | Austria     | 15.65        | -            | 5.21          | 0.01         |
|      |          | BeNeLux     | 0.76         | 55.27        | 24.21         | 0.07         |
|      |          | Denmark_W   | 0.03         | 15.24        | 19.42         | 0.00         |
|      |          | France      | 40.53        | 0.00         | 145.90        | 1.20         |
|      |          | Germany     | 20.34        | 205.16       | 127.70        | 2.93         |
|      |          | Iberia      | 26.70        | 0.00         | 51.49         | 118.33       |
|      |          | Italy       | 37.95        | 0.00         | 9.11          | 55.39        |
|      |          | Nordel      | 164.06       | 110.41       | 5.79          | 0.00         |
|      |          | PolCzeSlk   | 7.28         | 0.00         | 82.30         | 0.32         |
|      |          | Switzerland | 9.47         | -            | 0.00          | 1.61         |
|      |          | UK_IE       | 15.69        | 62.90        | 167.26        | 1.60         |
| 2050 | Myopic   | Austria     | 15.60        | -            | 1.69          | 12.15        |
|      |          | BeNeLux     | 0.70         | 132.36       | 5.06          | 0.00         |
|      |          | Denmark_W   | 0.02         | 402.97       | 17.01         | 0.00         |
|      |          | France      | 40.08        | 374.11       | 83.73         | 0.00         |
|      |          | Germany     | 20.27        | 296.32       | 17.38         | 0.00         |
|      |          | Iberia      | 26.36        | 138.73       | 0.00          | 117.36       |
|      |          | Italy       | 37.91        | 0.00         | 52.75         | 55.36        |
|      |          | Nordel      | 152.30       | 540.98       | 4.53          | 0.00         |
|      |          | PolCzeSlk   | 7.22         | 0.00         | 66.74         | 0.00         |
|      |          | Switzerland | 9.41         | -            | 0.00          | 2.37         |
|      |          | UK_IE       | 13.66        | 1010.91      | 138.18        | 0.00         |
|      | Static   | Austria     | 15.60        | -            | 0.00          | 12.15        |
|      |          | BeNeLux     | 0.69         | 113.94       | 10.61         | 0.00         |
|      |          | Denmark_W   | 0.02         | 419.12       | 16.98         | 0.00         |
|      |          | France      | 40.00        | 416.98       | 58.97         | 0.00         |
|      |          | Germany     | 20.26        | 296.29       | 0.00          | 4.76         |
|      |          | Iberia      | 26.37        | 126.09       | 12.35         | 117.37       |
|      |          | Italy       | 37.90        | 0.00         | 52.74         | 55.36        |
|      |          | Nordel      | 151.80       | 576.72       | 0.00          | 0.00         |
|      |          | PolCzeSlk   | 7.22         | 44.29        | 11.36         | 0.43         |
|      |          | Switzerland | 9.41         | -            | 0.00          | 2.37         |
|      |          | UK_IE       | 13.68        | 968.00       | 139.16        | 0.00         |



## F.2. Sensitivity Study with Static Approach

Table S65.: Total Installed Capacities [GW], Storage

| Year | Scenario         | Hydrogen Storage | Pumped Storage | Li-Ion Battery |
|------|------------------|------------------|----------------|----------------|
| 2020 | Base             | 0.00             | 34.01          | 0.32           |
|      | CO2PricesHigh    | 0.00             | 34.01          | 0.34           |
|      | CO2PricesLow     | 0.00             | 34.01          | 0.09           |
|      | DemandHigh       | 0.00             | 34.01          | 0.30           |
|      | DemandLow        | 0.00             | 34.01          | 0.00           |
|      | FuelPricesHigh   | 0.00             | 34.01          | 0.27           |
|      | FuelPricesLow    | 0.00             | 34.01          | 0.33           |
|      | InterestRateHigh | 0.00             | 34.01          | 0.37           |
|      | InterestRateLow  | 0.00             | 34.01          | 0.27           |
|      | UsableAreaHigh   | 0.00             | 34.01          | 0.40           |
|      | UsableAreaLow    | 0.00             | 34.01          | 0.11           |
| 2030 | Base             | 0.00             | 34.01          | 9.02           |
|      | CO2PricesHigh    | 0.00             | 34.01          | 11.22          |
|      | CO2PricesLow     | 0.00             | 34.01          | 6.44           |
|      | DemandHigh       | 0.00             | 34.01          | 9.19           |
|      | DemandLow        | 0.00             | 34.01          | 8.69           |
|      | FuelPricesHigh   | 0.00             | 34.01          | 12.06          |
|      | FuelPricesLow    | 0.00             | 34.01          | 9.56           |
|      | InterestRateHigh | 0.00             | 34.01          | 10.01          |
|      | InterestRateLow  | 0.00             | 34.01          | 9.72           |
|      | UsableAreaHigh   | 0.00             | 34.01          | 13.30          |
|      | UsableAreaLow    | 0.00             | 34.01          | 8.36           |
| 2050 | Base             | 131.44           | 34.01          | 33.00          |
|      | CO2PricesHigh    | 153.54           | 34.01          | 34.13          |
|      | CO2PricesLow     | 80.73            | 34.01          | 30.80          |
|      | DemandHigh       | 159.03           | 34.01          | 49.76          |
|      | DemandLow        | 96.09            | 34.01          | 26.15          |
|      | FuelPricesHigh   | 157.63           | 34.01          | 34.18          |
|      | FuelPricesLow    | 2.46             | 34.01          | 33.17          |
|      | InterestRateHigh | 48.89            | 34.01          | 31.09          |
|      | InterestRateLow  | 135.95           | 34.01          | 30.81          |
|      | UsableAreaHigh   | 133.08           | 34.01          | 58.24          |
|      | UsableAreaLow    | 125.80           | 34.01          | 29.06          |

Table S66.: Total Installed Capacities [GW], Conventional Technologies

| Year | Scenario         | Nuclear | Coal  | Lignite | CCGT   | Gas Turbine | IC   |
|------|------------------|---------|-------|---------|--------|-------------|------|
| 2020 | Base             | 120.13  | 53.02 | 76.80   | 159.10 | 29.78       | 9.07 |
|      | CO2PricesHigh    | 120.13  | 53.02 | 51.50   | 159.10 | 33.18       | 9.07 |
|      | CO2PricesLow     | 120.13  | 53.02 | 80.16   | 159.10 | 29.53       | 9.07 |
|      | DemandHigh       | 120.13  | 53.02 | 95.45   | 159.10 | 31.51       | 9.07 |
|      | DemandLow        | 120.13  | 53.02 | 61.68   | 159.10 | 28.09       | 9.07 |
|      | FuelPricesHigh   | 120.13  | 53.02 | 123.90  | 159.10 | 26.58       | 9.07 |
|      | FuelPricesLow    | 120.13  | 53.02 | 36.83   | 159.10 | 47.39       | 9.07 |
|      | InterestRateHigh | 120.13  | 53.02 | 53.04   | 159.10 | 32.31       | 9.07 |
|      | InterestRateLow  | 120.13  | 53.02 | 91.22   | 159.10 | 28.32       | 9.07 |
|      | UsableAreaHigh   | 120.13  | 53.02 | 75.89   | 159.10 | 29.91       | 9.07 |
|      | UsableAreaLow    | 120.13  | 53.02 | 78.87   | 159.10 | 29.06       | 9.07 |
| 2030 | Base             | 83.55   | 23.53 | 75.78   | 114.98 | 30.30       | 3.81 |
|      | CO2PricesHigh    | 83.55   | 23.53 | 13.20   | 135.20 | 43.45       | 3.81 |
|      | CO2PricesLow     | 83.55   | 23.53 | 122.00  | 114.98 | 16.81       | 3.81 |
|      | DemandHigh       | 83.55   | 23.53 | 90.89   | 114.98 | 40.22       | 3.81 |
|      | DemandLow        | 83.55   | 23.53 | 60.28   | 114.98 | 22.01       | 3.81 |
|      | FuelPricesHigh   | 115.42  | 23.53 | 32.33   | 114.98 | 16.94       | 3.81 |
|      | FuelPricesLow    | 83.55   | 23.53 | 13.20   | 170.78 | 50.18       | 3.81 |
|      | InterestRateHigh | 83.55   | 23.53 | 72.32   | 119.41 | 52.53       | 3.81 |
|      | InterestRateLow  | 91.50   | 23.53 | 73.01   | 114.98 | 15.55       | 3.81 |
|      | UsableAreaHigh   | 83.55   | 23.53 | 79.21   | 114.98 | 31.33       | 3.81 |
|      | UsableAreaLow    | 83.55   | 23.53 | 75.72   | 114.98 | 32.13       | 3.81 |
| 2050 | Base             | 9.11    | 5.93  | 3.92    | 12.70  | 80.77       | 0.00 |
|      | CO2PricesHigh    | 9.48    | 5.93  | 3.92    | 0.00   | 67.83       | 0.00 |
|      | CO2PricesLow     | 3.77    | 5.93  | 3.92    | 64.63  | 98.33       | 0.00 |
|      | DemandHigh       | 13.47   | 5.93  | 3.92    | 20.87  | 108.49      | 0.00 |
|      | DemandLow        | 5.31    | 5.93  | 3.92    | 6.74   | 57.59       | 0.00 |
|      | FuelPricesHigh   | 9.36    | 5.93  | 3.92    | 0.00   | 63.49       | 0.00 |
|      | FuelPricesLow    | 2.02    | 5.93  | 3.92    | 136.52 | 136.17      | 0.00 |
|      | InterestRateHigh | 2.02    | 5.93  | 3.92    | 85.86  | 121.70      | 0.00 |
|      | InterestRateLow  | 48.00   | 5.93  | 3.92    | 0.00   | 67.10       | 0.00 |
|      | UsableAreaHigh   | 2.69    | 5.93  | 3.92    | 13.07  | 76.14       | 0.00 |
|      | UsableAreaLow    | 10.04   | 5.93  | 3.92    | 12.26  | 89.47       | 0.00 |

Table S67.: Total Installed Capacities [GW], Controllable Renewables

| <b>Year</b> | <b>Scenario</b>  | <b>Biomass</b> | <b>CSP</b> | <b>Hydro Reservoir</b> |
|-------------|------------------|----------------|------------|------------------------|
| 2020        | Base             | 24.07          | 2.20       | 56.74                  |
|             | CO2PricesHigh    | 24.07          | 2.20       | 56.74                  |
|             | CO2PricesLow     | 24.07          | 2.20       | 56.74                  |
|             | DemandHigh       | 24.07          | 2.20       | 56.74                  |
|             | DemandLow        | 24.07          | 2.20       | 56.74                  |
|             | FuelPricesHigh   | 24.07          | 2.20       | 56.74                  |
|             | FuelPricesLow    | 24.07          | 2.20       | 56.74                  |
|             | InterestRateHigh | 24.07          | 2.20       | 56.74                  |
|             | InterestRateLow  | 24.07          | 2.20       | 56.74                  |
|             | UsableAreaHigh   | 24.07          | 2.20       | 56.74                  |
|             | UsableAreaLow    | 24.07          | 2.20       | 56.74                  |
| 2030        | Base             | 24.07          | 2.20       | 57.57                  |
|             | CO2PricesHigh    | 24.07          | 2.20       | 57.57                  |
|             | CO2PricesLow     | 24.07          | 2.20       | 57.57                  |
|             | DemandHigh       | 24.07          | 2.20       | 57.57                  |
|             | DemandLow        | 24.07          | 2.20       | 57.57                  |
|             | FuelPricesHigh   | 24.07          | 2.20       | 57.57                  |
|             | FuelPricesLow    | 24.07          | 2.20       | 57.57                  |
|             | InterestRateHigh | 24.07          | 2.20       | 57.57                  |
|             | InterestRateLow  | 24.07          | 2.20       | 57.57                  |
|             | UsableAreaHigh   | 24.07          | 2.20       | 57.57                  |
|             | UsableAreaLow    | 24.07          | 2.20       | 57.57                  |
| 2050        | Base             | 24.07          | 0.00       | 58.57                  |
|             | CO2PricesHigh    | 24.07          | 0.00       | 58.57                  |
|             | CO2PricesLow     | 24.07          | 0.00       | 58.57                  |
|             | DemandHigh       | 24.07          | 0.00       | 58.57                  |
|             | DemandLow        | 24.07          | 0.00       | 58.57                  |
|             | FuelPricesHigh   | 24.07          | 0.00       | 58.57                  |
|             | FuelPricesLow    | 24.07          | 0.00       | 58.57                  |
|             | InterestRateHigh | 24.07          | 0.00       | 58.57                  |
|             | InterestRateLow  | 24.07          | 0.00       | 58.57                  |
|             | UsableAreaHigh   | 24.07          | 0.00       | 58.57                  |
|             | UsableAreaLow    | 24.07          | 0.00       | 58.57                  |

Table S68.: Total Installed Capacities [GW], Fluctuating Renewables

| Year | Scenario         | Run Of River | Wind Onshore | Wind Offshore | Photovoltaic |
|------|------------------|--------------|--------------|---------------|--------------|
| 2020 | Base             | 105.78       | 253.87       | 14.53         | 41.93        |
|      | CO2PricesHigh    | 105.78       | 256.74       | 14.53         | 41.31        |
|      | CO2PricesLow     | 105.78       | 250.52       | 14.53         | 43.98        |
|      | DemandHigh       | 105.78       | 257.87       | 14.55         | 39.35        |
|      | DemandLow        | 105.78       | 246.66       | 14.42         | 45.76        |
|      | FuelPricesHigh   | 105.78       | 240.32       | 14.53         | 60.33        |
|      | FuelPricesLow    | 105.78       | 243.41       | 14.53         | 35.02        |
|      | InterestRateHigh | 105.78       | 259.97       | 14.53         | 26.46        |
|      | InterestRateLow  | 105.78       | 223.92       | 14.53         | 79.50        |
|      | UsableAreaHigh   | 105.78       | 267.59       | 7.57          | 41.96        |
|      | UsableAreaLow    | 105.78       | 226.04       | 23.71         | 41.80        |
|      | Base             | 105.78       | 280.37       | 110.12        | 145.91       |
| 2030 | CO2PricesHigh    | 105.78       | 334.64       | 163.92        | 145.91       |
|      | CO2PricesLow     | 105.78       | 242.31       | 51.79         | 139.34       |
|      | DemandHigh       | 105.78       | 307.07       | 119.07        | 145.86       |
|      | DemandLow        | 105.78       | 256.67       | 99.92         | 145.83       |
|      | FuelPricesHigh   | 105.78       | 316.86       | 167.07        | 151.46       |
|      | FuelPricesLow    | 105.78       | 244.70       | 48.03         | 145.91       |
|      | InterestRateHigh | 105.78       | 250.73       | 53.68         | 124.54       |
|      | InterestRateLow  | 105.78       | 320.98       | 120.01        | 148.42       |
|      | UsableAreaHigh   | 105.78       | 389.20       | 32.77         | 158.30       |
|      | UsableAreaLow    | 105.78       | 277.24       | 129.33        | 111.36       |
| 2050 | Base             | 105.78       | 143.58       | 798.06        | 157.07       |
|      | CO2PricesHigh    | 105.78       | 143.67       | 812.41        | 156.62       |
|      | CO2PricesLow     | 105.78       | 145.69       | 739.28        | 151.66       |
|      | DemandHigh       | 105.78       | 201.09       | 975.86        | 214.74       |
|      | DemandLow        | 105.78       | 144.67       | 572.66        | 145.07       |
|      | FuelPricesHigh   | 105.78       | 142.98       | 813.07        | 156.62       |
|      | FuelPricesLow    | 105.78       | 153.18       | 593.43        | 145.52       |
|      | InterestRateHigh | 105.78       | 125.77       | 707.55        | 139.80       |
|      | InterestRateLow  | 105.78       | 117.47       | 731.76        | 156.62       |
|      | UsableAreaHigh   | 105.78       | 266.88       | 672.79        | 274.53       |
|      | UsableAreaLow    | 105.78       | 140.02       | 810.49        | 159.92       |

### F.3. Sensitivity Study with Myopic Approach

Table S69.: Total Installed Capacities [GW], Storage

| Year | Scenario         | Hydrogen Storage | Pumped Storage | Li-Ion Battery |
|------|------------------|------------------|----------------|----------------|
| 2030 | Base             | 0.00             | 34.01          | 7.37           |
|      | CO2PricesHigh    | 0.00             | 34.01          | 8.76           |
|      | CO2PricesLow     | 0.00             | 34.01          | 6.38           |
|      | DemandHigh       | 0.00             | 34.01          | 7.16           |
|      | DemandLow        | 0.00             | 34.01          | 6.73           |
|      | FuelPricesHigh   | 0.00             | 34.01          | 0.27           |
|      | FuelPricesLow    | 0.00             | 34.01          | 8.59           |
|      | InterestRateHigh | 0.00             | 34.01          | 9.52           |
|      | InterestRateLow  | 0.00             | 34.01          | 8.52           |
|      | UsableAreaHigh   | 0.00             | 34.01          | 12.51          |
|      | UsableAreaLow    | 0.00             | 34.01          | 7.45           |
| 2050 | Base             | 133.48           | 34.01          | 30.72          |
|      | CO2PricesHigh    | 152.11           | 34.01          | 31.99          |
|      | CO2PricesLow     | 71.01            | 34.01          | 28.82          |
|      | DemandHigh       | 159.70           | 34.01          | 49.39          |
|      | DemandLow        | 94.87            | 34.01          | 24.47          |
|      | FuelPricesHigh   | 140.27           | 34.01          | 26.04          |
|      | FuelPricesLow    | 2.05             | 34.01          | 33.09          |
|      | InterestRateHigh | 46.91            | 34.01          | 31.50          |
|      | InterestRateLow  | 137.83           | 34.01          | 31.65          |
|      | UsableAreaHigh   | 130.98           | 34.01          | 52.77          |
|      | UsableAreaLow    | 128.48           | 34.01          | 27.47          |

Table S70.: Total Installed Capacities [GW], Conventional Technologies

| Year | Scenario         | Nuclear | Coal  | Lignite | CCGT   | Gas Turbine | IC   |
|------|------------------|---------|-------|---------|--------|-------------|------|
| 2030 | Base             | 83.55   | 23.53 | 80.95   | 114.98 | 28.28       | 3.81 |
|      | CO2PricesHigh    | 83.55   | 23.53 | 40.48   | 117.28 | 41.21       | 3.81 |
|      | CO2PricesLow     | 83.55   | 23.53 | 124.04  | 114.98 | 17.16       | 3.81 |
|      | DemandHigh       | 83.55   | 23.53 | 98.22   | 114.98 | 36.94       | 3.81 |
|      | DemandLow        | 83.55   | 23.53 | 64.91   | 114.98 | 22.18       | 3.81 |
|      | FuelPricesHigh   | 83.55   | 23.53 | 112.88  | 114.98 | 12.52       | 3.81 |
|      | FuelPricesLow    | 83.55   | 23.53 | 25.81   | 159.16 | 51.40       | 3.81 |
|      | InterestRateHigh | 83.55   | 23.53 | 76.60   | 116.61 | 50.60       | 3.81 |
|      | InterestRateLow  | 83.72   | 23.53 | 87.07   | 114.98 | 14.26       | 3.81 |
|      | UsableAreaHigh   | 83.55   | 23.53 | 84.63   | 114.98 | 26.57       | 3.81 |
|      | UsableAreaLow    | 83.55   | 23.53 | 82.44   | 114.98 | 29.28       | 3.81 |
| 2050 | Base             | 7.62    | 5.93  | 71.66   | 12.25  | 20.75       | 0.00 |
|      | CO2PricesHigh    | 7.70    | 5.93  | 31.19   | 2.30   | 46.34       | 0.00 |
|      | CO2PricesLow     | 3.32    | 5.93  | 114.76  | 44.58  | 29.14       | 0.00 |
|      | DemandHigh       | 12.53   | 5.93  | 88.93   | 20.56  | 31.86       | 0.00 |
|      | DemandLow        | 4.19    | 5.93  | 55.62   | 7.83   | 11.85       | 0.00 |
|      | FuelPricesHigh   | 7.95    | 5.94  | 103.60  | 0.02   | 0.04        | 0.02 |
|      | FuelPricesLow    | 2.02    | 5.93  | 16.52   | 138.33 | 123.28      | 0.00 |
|      | InterestRateHigh | 2.02    | 5.93  | 67.31   | 87.22  | 65.47       | 0.00 |
|      | InterestRateLow  | 41.52   | 5.94  | 77.80   | 0.04   | 6.41        | 0.03 |
|      | UsableAreaHigh   | 2.02    | 5.93  | 75.34   | 14.92  | 14.96       | 0.00 |
|      | UsableAreaLow    | 8.62    | 5.93  | 73.15   | 10.90  | 28.81       | 0.00 |

Table S71.: Total Installed Capacities [GW], Controllable Renewables

| <b>Year</b> | <b>Scenario</b>  | <b>Biomass</b> | <b>CSP</b> | <b>Hydro Reservoir</b> |
|-------------|------------------|----------------|------------|------------------------|
| 2030        | Base             | 24.07          | 2.20       | 57.57                  |
|             | CO2PricesHigh    | 24.07          | 2.20       | 57.57                  |
|             | CO2PricesLow     | 24.07          | 2.20       | 57.57                  |
|             | DemandHigh       | 24.07          | 2.20       | 57.57                  |
|             | DemandLow        | 24.07          | 2.20       | 57.57                  |
|             | FuelPricesHigh   | 24.07          | 2.20       | 57.57                  |
|             | FuelPricesLow    | 24.07          | 2.20       | 57.57                  |
|             | InterestRateHigh | 24.07          | 2.20       | 57.57                  |
|             | InterestRateLow  | 24.07          | 2.20       | 57.57                  |
|             | UsableAreaHigh   | 24.07          | 2.20       | 57.57                  |
|             | UsableAreaLow    | 24.07          | 2.20       | 57.57                  |
| 2050        | Base             | 24.07          | 0.00       | 58.57                  |
|             | CO2PricesHigh    | 24.07          | 0.00       | 58.57                  |
|             | CO2PricesLow     | 24.07          | 0.00       | 58.57                  |
|             | DemandHigh       | 24.07          | 0.00       | 58.57                  |
|             | DemandLow        | 24.07          | 0.00       | 58.57                  |
|             | FuelPricesHigh   | 24.07          | 0.02       | 58.57                  |
|             | FuelPricesLow    | 24.07          | 0.00       | 58.57                  |
|             | InterestRateHigh | 24.07          | 0.00       | 58.57                  |
|             | InterestRateLow  | 24.07          | 0.04       | 58.57                  |
|             | UsableAreaHigh   | 24.07          | 0.00       | 58.57                  |
|             | UsableAreaLow    | 24.07          | 0.00       | 58.57                  |

Table S72.: Total Installed Capacities [GW], Fluctuating Renewables

| Year | Scenario         | Run Of River | Wind Onshore | Wind Offshore | Photovoltaic |
|------|------------------|--------------|--------------|---------------|--------------|
| 2030 | Base             | 105.78       | 302.23       | 106.77        | 123.07       |
|      | CO2PricesHigh    | 105.78       | 358.84       | 155.12        | 123.86       |
|      | CO2PricesLow     | 105.78       | 258.18       | 50.07         | 125.13       |
|      | DemandHigh       | 105.78       | 315.94       | 116.41        | 137.04       |
|      | DemandLow        | 105.78       | 287.28       | 97.33         | 110.05       |
|      | FuelPricesHigh   | 105.78       | 335.64       | 157.58        | 143.22       |
|      | FuelPricesLow    | 105.78       | 268.98       | 48.55         | 116.09       |
|      | InterestRateHigh | 105.78       | 273.07       | 50.07         | 107.40       |
|      | InterestRateLow  | 105.78       | 331.41       | 116.64        | 147.53       |
|      | UsableAreaHigh   | 105.78       | 413.52       | 32.22         | 124.70       |
|      | UsableAreaLow    | 105.78       | 285.77       | 123.90        | 108.51       |
| 2050 | Base             | 105.78       | 187.55       | 778.78        | 151.66       |
|      | CO2PricesHigh    | 105.78       | 243.63       | 760.26        | 151.66       |
|      | CO2PricesLow     | 105.78       | 150.38       | 737.43        | 151.66       |
|      | DemandHigh       | 105.78       | 221.94       | 964.99        | 216.15       |
|      | DemandLow        | 105.78       | 187.53       | 549.85        | 144.35       |
|      | FuelPricesHigh   | 105.78       | 243.25       | 751.41        | 168.91       |
|      | FuelPricesLow    | 105.78       | 164.05       | 592.15        | 144.34       |
|      | InterestRateHigh | 105.78       | 146.48       | 693.62        | 142.21       |
|      | InterestRateLow  | 105.78       | 249.20       | 671.68        | 151.74       |
|      | UsableAreaHigh   | 105.78       | 336.70       | 634.76        | 270.01       |
|      | UsableAreaLow    | 105.78       | 199.17       | 777.15        | 166.53       |



# List of Tables

|                                                                                                                                                                                                                        |    |
|------------------------------------------------------------------------------------------------------------------------------------------------------------------------------------------------------------------------|----|
| S1. Social descriptors selected by ZIRIUS in [WJPH15] . . . . .                                                                                                                                                        | 4  |
| S2. Selected representative power system model parameters . . . . .                                                                                                                                                    | 5  |
| S3. Descriptors-DSM . . . . .                                                                                                                                                                                          | 6  |
| S4. DMM: Descriptors to REMix parameters . . . . .                                                                                                                                                                     | 7  |
| S5. REMix Parameters-DSM: Indirect Influences . . . . .                                                                                                                                                                | 8  |
| S6. Maximum installable capacity of offshore wind [MW] . . . . .                                                                                                                                                       | 14 |
| S7. Maximum installable capacity of offshore wind (continued) [MW] . . . . .                                                                                                                                           | 15 |
| S8. Maximum installable capacity of photovoltaic [MW] . . . . .                                                                                                                                                        | 16 |
| S9. Maximum installable capacity of photovoltaic (continued) [MW] . . . . .                                                                                                                                            | 17 |
| S10. Maximum installable capacity of Run-of-river [MW] . . . . .                                                                                                                                                       | 18 |
| S11. Maximum installable capacity of Run-of-river (continued) [MW] . . . . .                                                                                                                                           | 19 |
| S12. Maximum installable capacity of onshore wind [MW] . . . . .                                                                                                                                                       | 20 |
| S13. Maximum installable capacity of onshore wind (continued) [MW] . . . . .                                                                                                                                           | 21 |
| S14. Maximum installable capacity of CSP [MW] . . . . .                                                                                                                                                                | 22 |
| S15. Maximum installable capacity of Hydrogen storage [MW] . . . . .                                                                                                                                                   | 23 |
| S16. Maximum installable capacity of Hydrogen storage (continued) [MW] . . . . .                                                                                                                                       | 24 |
| S17. Lifetime [Years] . . . . .                                                                                                                                                                                        | 26 |
| S18. Amortisation Time [years] . . . . .                                                                                                                                                                               | 27 |
| S19. Availability [%] . . . . .                                                                                                                                                                                        | 28 |
| S20. Capacity Credit [%] . . . . .                                                                                                                                                                                     | 29 |
| S21. Investment Costs 1 [€ <sub>2014</sub> /kW] . . . . .                                                                                                                                                              | 29 |
| S22. Investment Costs 2 [€ <sub>2014</sub> /kW] . . . . .                                                                                                                                                              | 30 |
| S23. Investment Costs 3 [€ <sub>2014</sub> /kW] . . . . .                                                                                                                                                              | 30 |
| S24. Variable Costs [€ <sub>2014</sub> /kWh] . . . . .                                                                                                                                                                 | 31 |
| S25. Tear and Wear Costs [€ <sub>2014</sub> /kW] . . . . .                                                                                                                                                             | 32 |
| S26. Emission factors per fuel [NPS <sup>+</sup> 12, WAE12] . . . . .                                                                                                                                                  | 32 |
| S27. Efficiencies by technology and age group . . . . .                                                                                                                                                                | 32 |
| S28. Technology Parameters, Storage 1 (based on DLR internal assessment of various<br>sources [AAG <sup>+</sup> 12, CCY <sup>+</sup> 09, FLLS12, DFF <sup>+</sup> 09, JWM07, HEB <sup>+</sup> 12, Sau09, MM12, Eur03]) | 33 |
| S29. Technology Parameters, Storage 2 (based on DLR internal assessment of various<br>sources [AAG <sup>+</sup> 12, CCY <sup>+</sup> 09, FLLS12, DFF <sup>+</sup> 09, JWM07, HEB <sup>+</sup> 12, Sau09, MM12, Eur03]) | 34 |
| S30. Final Electricity Consumption Development [TWh] . . . . .                                                                                                                                                         | 36 |
| S31. Final Electricity Consumption Development per European region [TWh] . . . . .                                                                                                                                     | 37 |
| S32. Final Electricity Consumption Development per German region [TWh] . . . . .                                                                                                                                       | 38 |
| S33. Usable areas: Literature Values . . . . .                                                                                                                                                                         | 39 |

|                                                                                                               |    |
|---------------------------------------------------------------------------------------------------------------|----|
| S34. Usable Areas: Base Scenario, Minimum and Maximum values . . . . .                                        | 40 |
| S35. Coal Prices Development [€ <sub>2014</sub> /MWh] . . . . .                                               | 41 |
| S36. Gas Prices Development [€ <sub>2014</sub> /MWh] . . . . .                                                | 41 |
| S37. Lignite Prices Development [€ <sub>2014</sub> /MWh] . . . . .                                            | 42 |
| S38. Oil Prices Development [€ <sub>2014</sub> /MWh] . . . . .                                                | 42 |
| S39. Interest Rate [%] . . . . .                                                                              | 43 |
| S40. CO <sub>2</sub> Allowance Prices Development [€ <sub>2014</sub> /t <sub>CO<sub>2</sub></sub> ] . . . . . | 43 |
| S41. Net Power Generation [TWh], Storage . . . . .                                                            | 45 |
| S42. Net Power Generation [TWh], Conventional Technologies . . . . .                                          | 45 |
| S43. Net Power Generation [TWh], Controllable Renewable Energies . . . . .                                    | 45 |
| S44. Net Power Generation [TWh], Fluctuating Renewable Energies . . . . .                                     | 45 |
| S45. Total Installed Capacities [GW], Storage . . . . .                                                       | 46 |
| S46. Total Installed Capacities [GW], Conventional Technologies . . . . .                                     | 46 |
| S47. Total Installed Capacities [GW], Controllable Renewable Energies . . . . .                               | 46 |
| S48. Total Installed Capacities [GW], Fluctuating Renewable Energies . . . . .                                | 46 |
| S49. Averaged Full Load Hours [h], Storage . . . . .                                                          | 47 |
| S50. Averaged Full Load Hours [h], Conventional Technologies . . . . .                                        | 47 |
| S51. Averaged Full Load Hours [h], Controllable Renewable Energies . . . . .                                  | 47 |
| S52. Averaged Full Load Hours [h], Fluctuating Renewable Energies . . . . .                                   | 47 |
| S53. Installed Transmission Capacities [GW], From - To Region 1 . . . . .                                     | 48 |
| S54. Installed Transmission Capacities [GW], From - To Region 2 . . . . .                                     | 48 |
| S55. Installed Transmission Capacities [GW], From - To Region 3 . . . . .                                     | 48 |
| S56. Installed Transmission Capacities [GW], From - To Region 4 . . . . .                                     | 48 |
| S57. Total Installed Capacities per Region [GW], Storage . . . . .                                            | 49 |
| S58. Total Installed Capacities per Region [GW], Conventional Technologies . . . . .                          | 50 |
| S59. Total Installed Capacities per Region [GW], Controllable Renewables . . . . .                            | 51 |
| S60. Total Installed Capacities per Region [GW], Fluctuating Renewables . . . . .                             | 52 |
| S61. Net Power Generation per Region [TWh], Conventional Technologies . . . . .                               | 53 |
| S62. Net Power Generation per Region [TWh], Conventional Technologies . . . . .                               | 54 |
| S63. Net Power Generation per Region [TWh], Controllable Renewable Energies . . . . .                         | 55 |
| S64. Net Power Generation per Region [TWh], Fluctuating Renewable Energies . . . . .                          | 56 |
| S65. Total Installed Capacities [GW], Storage . . . . .                                                       | 57 |
| S66. Total Installed Capacities [GW], Conventional Technologies . . . . .                                     | 58 |
| S67. Total Installed Capacities [GW], Controllable Renewables . . . . .                                       | 59 |
| S68. Total Installed Capacities [GW], Fluctuating Renewables . . . . .                                        | 60 |
| S69. Total Installed Capacities [GW], Storage . . . . .                                                       | 61 |
| S70. Total Installed Capacities [GW], Conventional Technologies . . . . .                                     | 62 |
| S71. Total Installed Capacities [GW], Controllable Renewables . . . . .                                       | 63 |
| S72. Total Installed Capacities [GW], Fluctuating Renewables . . . . .                                        | 64 |

# Bibliography

- [AAG<sup>+</sup>12] ADAMEK, Dr. F. ; AUNDRUP, Thomas ; GLAUNSINGER, Wolfgang ; KLEIMAIER, Dr. M. ; LANDINGER, Hubert ; LEUTHOLD, Dr. M. ; LUNZ, Benedikt ; MOSER, Dr. Ing. A. ; PAPE, Dr. C. ; PLUNTKE, Helge ; ROTERING, Niklas ; SAUER, Dr.-Ing. Dirk U. ; STERNER, Dr.-Ing. M. ; OW, Dr.-Ing. Wolfram W.: Energiespeicher f r die Energiewende: Speicherbedarf und Auswirkungen f r das  bertragungsnetz f r Szenarien bis 2050 / VDE. 2012. – Study
- [BCB<sup>+</sup>11] BIROL, Fatih ; COZZI, Laura ; BROMHEAD, Amos ; CORBEN, John ; BARONI, Marco ; GOULD, Tim ; OLEJARNIK, Pawel ; DORNER, Dan: World Energy Outlook 2011 / International Energy Agency (IEA). 2011. – Annual Report. – ISBN: 978 92 64 12413 4
- [BPG<sup>+</sup>15] BORGGREFE, Frieder ; PREGGER, Thomas ; GILS, Hans C. ; CAO, Karl-Ki n ; DEISENROTH, Marc ; BOTHOR, Sebastian ; BLES, Markus ; FAHL, Ulrich ; STEURER, Martin ; WIESMETH, Michael: Kurzstudie zur Kapazit tsentwicklung in S ddeutschland bis 2025 unter Ber cksichtigung der Situation in Deutschland und den europ ischen Nachbarstaaten / Deutsches Zentrum f r Luft- und Raumfahrt (DLR) and Institut f r Energiewirtschaft und Rationelle Energieanwendung (IER). 2015. – Political Report
- [CCY<sup>+</sup>09] CHEN, Haisheng ; CONG, Than N. ; YANG, Wei ; TAN, Chunqing ; LI, Yongliang ; DING, Yulong: Progress in electrical energy storage system: A critical review. In: *Progress in Natural Science* 19 (2009), S. 291 312
- [DFF<sup>+</sup>09] DLR ; FORSCHUNGSINSTITUT J  LICH ; FRAUNHOFER ISE ; FRAUNHOFER ISI ; FRAUNHOFER UMSICHT ; IFHT ; KIT: Energietechnologien 2050  Schwerpunkte f r Forschung und Entwicklung / Bundesministerium f r Wirtschaft und Technologie (BMWi). 2009. – Political Report
- [EEX15] EEX: *EU Emission Allowances - Secondary Market*. <https://www.eex.com/de/marktdaten/umweltprodukte/spotmarkt/european-emission-allowances#!/2014/07/01>. Version: July 2015
- [ENT14] ENTSOE-E: *10-Year Network Development Plan*. [https://www.entsoe.eu/Documents/TYNDP%20documents/TYNDP%202014/141031%20TYNDP%202014%20Report\\_.pdf](https://www.entsoe.eu/Documents/TYNDP%20documents/TYNDP%202014/141031%20TYNDP%202014%20Report_.pdf). Version: 2014
- [ENT15] ENTSOE-E: *Statistical Factsheet 2014*. [https://www.entsoe.eu/Documents/Publications/Statistics/Factsheet/entsoe\\_sfs2014\\_web.pdf](https://www.entsoe.eu/Documents/Publications/Statistics/Factsheet/entsoe_sfs2014_web.pdf). Version: April 2015

- [Eur03] EUROPEAN COMMISSION: *Investigation of storage technologies for intermittent renewable energies : evaluation and recommended r&d strategies (INVESTIRE NETWORK)*. [http://cordis.europa.eu/project/rcn/56929\\_en.html](http://cordis.europa.eu/project/rcn/56929_en.html). Version: 2003
- [Eur11a] EUROPEAN COMMISSION: *A Roadmap for moving to a competitive low carbon economy in 2050*. Communication from the Commission to the European Parliament, the Council, the European Economic and Social Committee and the Committee of the Regions. <http://eur-lex.europa.eu/legal-content/EN/TXT/?uri=CELEX:52011DC0112>. Version: March 2011
- [Eur11b] EUROPEAN ENVIRONMENT AGENCY (EEA): *National Renewable Energy Action Plan (NREAP) data from Member States*. <http://www.eea.europa.eu/data-and-maps/figures/national-renewable-energy-action-plan>. Version: November 2011
- [FLLS12] FUCHS, Georg ; LUNZ, Benedikt ; LEUTHOLD, Dr. M. ; SAUER, Prof. Dr. Dirk U.: *Technology Overview on Electricity Storage: Overview on the potential and on the deployment perspectives of electricity storage technologies / Institute for Power Electronics and Electrical Drives (ISEA), RWTH Aachen University on behalf of Smart Energy for Europe Platform GmbH (SEFEP)*. Jngerstr. 17-19, 52066 Aachen, Germany, June 2012. – Technical Report
- [HEB<sup>+</sup>12] HARTMANN, Niklas ; ELTROP, Ludger ; BAUER, Nikolaus ; SALZER, Johannes ; SCHWARZ, Simon ; SCHMIDT, Maike: *Stromspeicherpotenziale fr Deutschland / Zentrum fr Energieforschung Stuttgart*. 2012. – Technical Report
- [Hel10] HELD, 2010: D. Anne: *Modelling the future development of renewable energy technologies in the European electricity sector using agent-based simulation*, Diss., 2010
- [HHM11] HEWICKER, Christian (.; HOGAN, Michael (.; MOGREN, Arne (.: *Power Perspectives 2030 - On the road to a decarbonized power sector / KEMA and The Energy Future Lab at Imperial College London and The Regulatory Assistance Project (RAP) and E3G*. 2011. – Political Report
- [Hoo04] HOOGWIJK, Monique: *On the global and regional potential of renewable energy sources*, Diss., 2004
- [Hun15] HUNDT, Matthias: *Investitionsplanung unter unsicheren Einflussgrßen: Thermische Kraftwerke als Realoptionen*, Institut fr Energiewirtschaft und Rationelle Energieanwendung, Universitt Stuttgart, Ph.D. Thesis, 2015
- [Inf15] INFOMINE: *Price and Price Charts*. <http://www.infomine.com/investment/metal-prices/>. Version: August 2015
- [JWM07] JOSSEN, Andreas ; WOHLFAHRT-MEHRENS, Margret: *Overview on current status of lithium-Ion batteries / Zentrum fr Sonnenenergie- und Wasserstoff-Forschung (ZSW)*. 2007. – Second International Renewable Energy Storage Conference

## Bibliography

---

- [MM12] MAHNKE, Eva ; MÄHLENHOFF, Jörg: Renewables Spezial: Strom speichern / Agentur für Erneuerbare Energien e. V. 2012. – Technical Report
- [MW12] MILLS, Andrew ; WISER, Ryan: Changes in the Economic Value of Variable Generation at High Penetration Levels: A Pilot Case Study of California / Ernest Orlando Lawrence Berkeley National Laboratory. 2012. – Research Report
- [NBH<sup>+</sup>14] NOACK, Christoph ; BURGGRAF, Dr. F. ; HOSSEINY, Seyed S. ; LETTENMEIER, Philipp ; KOLB, Svenja ; BELZ, Dr. S. ; KALLO, Dr. J. ; FRIEDRICH, Prof. K. A. ; PREGGER, Dr. T. ; CAO, Karl K. ; HEIDE, Dr. D. ; NAEGLER, Dr. T. ; BORGGREFE, Frieder: Studie über die Planung einer Demonstrationsanlage zur Wasserstoff-Kraftstoffgewinnung durch Elektrolyse mit Zwischenspeicherung in Salzkavernen unter Druck / Deutsches Zentrum für Luft- und Raumfahrt e.V. (DLR), Institut für Technische Thermodynamik und Ludwig-Bölkow-Systemtechnik GmbH (LBST) and Fraunhofer-Institut für Solare Energiesysteme ISE and KBB Underground Technologies GmbH. 2014. – Political Report
- [NPS<sup>+</sup>12] NITSCH, J. ; PREGGER, T. ; SCHOLZ, Y. ; NAEGLER, T. ; STERNER, M. ; GERHARDT, N. ; OEHSSEN, A. ; PAPE, C. von ; SAINT-DRENAN, Y.-M. ; WENZEL, B.: Schlussbericht- Langfristszenarien und Strategien für den Ausbau der erneubaren Energien in Deutschland bei Berücksichtigung der Entwicklung in Europa und global / Deutsches Zentrum für Luft- und Raumfahrt (DLR), Fraunhofer Institut für Windenergie und Energiesystemtechnik (IWES), Ingenieurbüro für neue Energien (IFNE). 2012. – Political Report
- [OEC12] OECD: OECD Economic Outlook, Volume 2012 Issue 1. (2012). [http://dx.doi.org/10.1787/eco\\_outlook-v2012-1-en](http://dx.doi.org/10.1787/eco_outlook-v2012-1-en). – DOI 10.1787/eco\_outlook-v2012-1-en
- [Pal13] PALMINTIER, Bryan S.: *Incorporating Operational Flexibility Into Electric Generation Planning: Impacts and Methods for System Design and Policy Analysis*, Massachusetts Institute of Technology, Ph.D. Thesis, February 2013
- [pla15] PLATTS: World Electric Power Plants Database / The McGraw-Hill Companies, Inc. 2015. – Database. – ISBN 1-56760-260-6
- [Sau09] SAUER, Dirk U.: Vergleich von Betriebskosten verschiedener Speichertechnologien und nicht-klassischer Alternativen / Institut für Stromrichtertechnik und Elektrische Antriebe (ISEA), RWTH Aachen University. 2009. – Technical Report
- [Sch12] SCHOLZ, Dipl.-Ing. Y.: *Renewable energy based electricity supply at low costs: Development of the REMix model and application for Europe*, Institut für Thermodynamik und Wärmetechnik, Universität Stuttgart, Ph.D. Thesis, 2012
- [Ste14] STETTER, Daniel: *Enhancement of the REMix energy model – global renewable energy potentials optimized power plant siting and scenario validation*, Diss., 2014

- [Str14] STREICHER, Kai N.: *Sustainable energy system pathways: Development and assessment of an indicatorbased model approach to enhance sustainability of future energy technology pathways in Germany (SEnSys)*, Linköping University, Master Thesis, 2014
- [SW07] SWIDER, Derk J. ; WEBER, Christoph: The costs of wind's intermittency in Germany: application of a stochastic electricity market model. In: *EUROPEAN TRANSACTIONS ON ELECTRICAL POWER* 17 (2007), S. 151–172
- [Tre15] TREUHERZ, David: The impact of various meteorological years on system reliability in a German energy scenario for 2025 / Deutsches Zentrum für Luft- und Raumfahrt. 2015. – Bachelor Thesis
- [Unt14] UNTEUTSCH, Michaela: *Essays on the Economics of Renewable Energy Policy*, Wirtschafts- und Sozialwissenschaftlichen Fakultät, Universität zu Köln, Ph.D. Thesis, 2014
- [WAE12] WAERTSILAE: *Power Plants Product Catalogue*, April 2012
- [WJPH15] WEIMER-JEHLE, Wolfgang ; PREHOFER, Sigrid ; HAUSER, Wolfgang: Kontextszenarien der deutschen Energiewende - Eine Datenerhebung zur Analyse gesellschaftlich-politischer Rahmenbedingungen einer sozio-technischen Transformation / ZIRIUS - Zentrum für interdisziplinäre Risiko- und Innovationsforschung, Universität Stuttgart. 2015. – Working Paper
- [Wor15] WORLD NUCLEAR ASSOCIATION: *Country Profiles*. <http://www.world-nuclear.org/info/Country-Profiles/>. Version: 2015
- [ZLM10] ZERVOS, Prof. A. ; LINS, Christine ; MUTH, Josche: RE-thinking 2050 - A 100% Renewable Energy Vision for the European Union / European Renewable Energy Council. 2010. – Report
